# Supplementary material for: Demographic and clinical characteristics of patients with delirium: analysis of a nationwide Japanese medical database
Source: PubMed Central journal article supplement — BMJ Open. 2022 Sep 14;12(9):e060630. doi: 10.1136/bmjopen-2021-060630 (PMC9476131; doi:10.1136/bmjopen-2021-060630), 2022-09-14
Supplement: bmjopen-2021-060630.draft_revisions.pdf [file bmjopen-2021-060630.draft_revisions.pdf]

# BMJ Open

BMJ Open is committed to open peer review. As part of this commitment we make the peer review history of every article we publish publicly available.

When an article is published we post the peer reviewers' comments and the authors' responses online. We also post the versions of the paper that were used during peer review. These are the versions that the peer review comments apply to.

The versions of the paper that follow are the versions that were submitted during the peer review process. They are not the versions of record or the final published versions. They should not be cited or distributed as the published version of this manuscript.

BMJ Open is an open access journal and the full, final, typeset and author-corrected version of record of the manuscript is available on our site with no access controls, subscription charges or pay-per-view fees (<http://bmjopen.bmj.com>).

If you have any questions on BMJ Open's open peer review process please email [info.bmjopen@bmj.com](mailto:info.bmjopen@bmj.com)

# BMJ Open

## Demographic and clinical characteristics of patients with delirium: analysis of a nationwide Japanese medical database

|                               |                                                                                                                                                                                                                                                                                                                                                   |
|-------------------------------|---------------------------------------------------------------------------------------------------------------------------------------------------------------------------------------------------------------------------------------------------------------------------------------------------------------------------------------------------|
| Journal:                      | <i>BMJ Open</i>                                                                                                                                                                                                                                                                                                                                   |
| Manuscript ID                 | bmjopen-2021-060630                                                                                                                                                                                                                                                                                                                               |
| Article Type:                 | Original research                                                                                                                                                                                                                                                                                                                                 |
| Date Submitted by the Author: | 21-Jan-2022                                                                                                                                                                                                                                                                                                                                       |
| Complete List of Authors:     | Ueda, Naoya; MSD KK<br>Igarashi, Masakazu; MSD KK<br>Okuyama, Kotoba; MSD KK<br>Sano, Hideki; MSD KK<br>Takahashi, Kanae; MSD KK<br>P. Qureshi, Zaina; Merck & Co Inc<br>Tokita, Shigeru; MSD KK<br>Ogawa, Asao; National Cancer Center Japan<br>Okumura, Yasuyuki; Ippan Shadan Hojin Rinsho Ekigaku Kenkyu Suishin Kiko<br>Okuda, Shoki; MSD KK |
| Keywords:                     | Delirium & cognitive disorders < PSYCHIATRY, PSYCHIATRY, EPIDEMIOLOGY                                                                                                                                                                                                                                                                             |
|                               |                                                                                                                                                                                                                                                                                                                                                   |

SCHOLARONE™  
Manuscripts

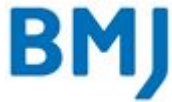

I, the Submitting Author has the right to grant and does grant on behalf of all authors of the Work (as defined in the below author licence), an exclusive licence and/or a non-exclusive licence for contributions from authors who are: i) UK Crown employees; ii) where BMJ has agreed a CC-BY licence shall apply, and/or iii) in accordance with the terms applicable for US Federal Government officers or employees acting as part of their official duties; on a worldwide, perpetual, irrevocable, royalty-free basis to BMJ Publishing Group Ltd ("BMJ") its licensees and where the relevant Journal is co-owned by BMJ to the co-owners of the Journal, to publish the Work in this journal and any other BMJ products and to exploit all rights, as set out in our [licence](#).

The Submitting Author accepts and understands that any supply made under these terms is made by BMJ to the Submitting Author unless you are acting as an employee on behalf of your employer or a postgraduate student of an affiliated institution which is paying any applicable article publishing charge ("APC") for Open Access articles. Where the Submitting Author wishes to make the Work available on an Open Access basis (and intends to pay the relevant APC), the terms of reuse of such Open Access shall be governed by a Creative Commons licence – details of these licences and which [Creative Commons](#) licence will apply to this Work are set out in our licence referred to above.

Other than as permitted in any relevant BMJ Author's Self Archiving Policies, I confirm this Work has not been accepted for publication elsewhere, is not being considered for publication elsewhere and does not duplicate material already published. I confirm all authors consent to publication of this Work and authorise the granting of this licence.

**Title:**

Demographic and clinical characteristics of patients with delirium: analysis of a nationwide Japanese medical database

**Authors:**

Naoya Ueda<sup>1</sup>, Masakazu Igarashi<sup>1</sup>, Kotoba Okuyama<sup>1</sup>, Hideki Sano<sup>1</sup>, Kanae Takahashi<sup>2</sup>, Zaina P. Qureshi<sup>3</sup>, Shigeru Tokita<sup>1</sup>, Asao Ogawa<sup>4</sup>, Yasuyuki Okumura<sup>5</sup>, Shoki Okuda<sup>1</sup>

**Affiliations:**

<sup>1</sup>Medical Affairs, MSD K.K., Tokyo, Japan

<sup>2</sup>Japan Development, MSD K.K., Tokyo, Japan

<sup>3</sup>Center for Observational and Real-world Evidence (CORE), Merck & Co., Inc., Kenilworth, NJ, USA

<sup>4</sup>Division of Psycho-Oncology, Exploratory Oncology Research and Clinical Trial Center, National Cancer Center, Chiba, Japan

<sup>5</sup>Initiative for Clinical Epidemiological Research, Tokyo, Japan

**Corresponding author:**

Shoki Okuda, PhD

Address: MSD K.K., Kitanomaru Square, 1-13-12 Kudan-kita, Chiyoda-ku

Tokyo 102-8667, Japan

Email: shoki.okuda@merck.com

Telephone: +81-3-6272-0136

1  
2  
3 **Word count**  
4

5 **Abstract** - 296 words (word count limit: 300)  
6

7  
8 **Main text** - 3,648 words (word count limit: 4,000)  
9

10 **Numbers:**  
11

12 Tables - 4  
13

14 Figures - 1  
15

16 References - 45  
17  
18  
19  
20  
21  
22  
23  
24  
25  
26  
27  
28  
29  
30  
31  
32  
33  
34  
35  
36  
37  
38  
39  
40  
41  
42  
43  
44  
45  
46  
47  
48  
49  
50  
51  
52  
53  
54  
55  
56  
57  
58  
59  
60

For peer review only

## ABSTRACT

**Objectives:** Delirium commonly occurs during hospitalization and is associated with increased mortality, especially in elderly patients. This study aimed to determine the demographic and clinical characteristics of patients with delirium in the Japanese real-world clinical setting using a nationwide database comprising claims and discharge abstract data.

**Design:** This was an observational, cross-sectional, retrospective study in hospitalized patients with an incident delirium identified by a diagnosis based on International Classification of Diseases, 10th revision codes or initiating antipsychotics recommended for delirium treatment in Japan during their hospitalization.

**Setting:** Patients from the Medical Data Vision database including more than 400 acute care hospitals in Japan were evaluated from admission to discharge.

**Participants:** Of the 32,910,227 patients who were included in the database between April 2012 and September 2020, 145,219 patients met the criteria for delirium.

**Primary and secondary outcome measures:** Demographic and baseline characteristics, comorbidities, clinical profiles, and pharmacological treatments were evaluated in patients with delirium.

**Results:** The mean (standard deviation [SD]) patient age was 76.5 (13.8) years. More than half of the patients (n=82,159; 56.6%) were male. The most frequent comorbidity was circulatory disease, observed in 81,954 (56.4%) patients. Potentially inappropriate medications (PIMs) with risk of delirium including benzodiazepines and opioids were prescribed to 76,798 (52.9%) patients. Approximately three-fourths of these patients (56,949; 74.2%) were prescribed  $\geq 4$  PIMs. The most prescribed treatment for delirium was injectable haloperidol (n=82,490; 56.8%). Mean (SD) length of hospitalization was 16.0 (12.1) days.

**Conclusions:** The study results provide comprehensive details of the clinical characteristics of patients with delirium and treatment patterns with antipsychotics in the Japanese acute care setting. In this patient population, the prescription rate of injectable haloperidol and PIMs was high, suggesting the need for improved understanding among healthcare providers about the appropriate management of delirium, which may benefit patients.

**ARTICLE SUMMARY - Strengths and limitations of this study**

- This was the first nationwide study that comprehensively assessed the clinical characteristics of patients with delirium in the real-world setting of acute care hospitals in Japan.
- Analysis of the nationwide claims and discharge abstract database, using an algorithm adapted to the Japanese clinical setting, enabled identification of a large sample of patients with delirium in acute care hospitals in Japan.
- The results of the sensitivity analysis demonstrated outcomes consistent with those of the main analyses, reinforcing the robustness of the study results.
- Data were identified from the Medical Data Vision database, which is designed to capture claims and discharge abstracts in Japan and is not for research use; therefore, misclassification of the International Classification of Diseases, 10th revision codes may occur, given that no quality check is performed.

**KEYWORDS:** Acute care hospitals, Antipsychotics, Delirium, Medical record database, Real-world evidence

## INTRODUCTION

Delirium is an acute condition characterized by fluctuating disturbances in attention, awareness, and cognition.[1] It frequently occurs in hospitalized elderly patients in an acute care setting, especially those in intensive care units (ICUs), and in postoperative care settings.[2,3] The prevalence of delirium is reported as 10%–31% among hospitalized patients within 24 hours of admission.[4] Among elderly patients, the prevalence is reported as 15%–53% after surgery [5,6] and 80% in those admitted to the ICU.[5] Previous studies have shown that delirium is associated with prolonged hospital stay and institutionalization [2,7] and increased mortality in nonsurgical and surgical patients in general wards, emergency departments, and ICUs.[7,8] Furthermore, long-term cognitive and functional decline is associated with delirium, often lasting up to a year following hospital discharge.[7,9] Consequently, delirium increases economic burden by raising healthcare expenditure and imposing costs related to loss of well-being.[3]

Despite its high prevalence and poor prognosis, delirium remains unrecognized in a substantial proportion of old patients. In a prospective clinical epidemiological study, even nursing personnel was unable to recognize delirium in up to two-thirds of the hospitalized elderly patients.[10] Recent evidence suggests that antipsychotics and multicomponent interventions can notably reduce the incidence of delirium and improve clinical outcomes,[11-13] emphasizing the need for early intervention and prevention in the hospitalized or postoperative elderly population that is at risk of delirium.[14]

Antipsychotics are widely used for the treatment of delirium, although no standard clinical pathway for the management of delirium has been established. The Japanese Ministry of Health, Labour and Welfare (MHLW) issued a notification in 2011, permitting the reimbursement of off-label oral and injectable haloperidol, oral perospirone, quetiapine, and risperidone for the treatment of delirium, psychomotor agitation, and irritability associated with organic diseases.[15] In addition, the Japanese Society of General Hospital Psychiatry recommended the use of several antipsychotics in a pharmacotherapy algorithm for delirium.[16] However, few studies have quantitatively investigated the use of antipsychotics for the treatment of patients with delirium in real world clinical practice in Japan.[17,18]

A limited number of studies have examined the characteristics of patients experiencing delirium based on a medical database.[17-25] This is because identification of delirium through a medical database is quite challenging, given the inconsistent and poor documentation of records.[26] Moreover, the identification of delirium requires bedside cognitive assessments and application of validated diagnostic tools such as the Confusion Assessment Method (CAM) [27] or the Diagnostic and Statistical Manual of Mental Disorders criteria.[1] Therefore, delirium is not routinely evaluated in acute care hospitals,[26,28] and the information on delirium diagnosis rarely gets recorded in healthcare utilization databases (e.g., claims data or hospital clinical data repository).

Although several medical database studies in the USA [19] and Japan [24] have used International Classification of Diseases, 9th revision (ICD-9) or ICD, 10th revision (ICD-10) codes to identify patients with a diagnosis of delirium, only around 2% of patients with



1  
2  
3 delirium (postoperative in Japan) could be identified. On the other hand, several medical  
4 database studies have employed antipsychotic use to identify patients with  
5 delirium.[21,23,25] However, either of these criteria, when used exclusively, may be  
6 inadequate in obtaining a comprehensive and true picture of delirium patients in the real-  
7 world clinical setting in Japan.  
8  
9

10 To date, few studies have investigated the overall profile of delirium patients in the real-  
11 world clinical setting in Japan. The present study aimed to assess the demographic  
12 characteristics, comorbidities, clinical profiles, and treatments in patients with delirium  
13 during hospitalization in Japan from a nationwide database comprising claims and discharge  
14 abstract data. In this study, delirium was defined using the algorithms that were  
15 recommended in the recently published claims-based database studies with slight  
16 modifications.[22,24]  
17  
18  
19  
20  
21  
22  
23  
24  
25  
26  
27  
28  
29  
30  
31  
32  
33  
34  
35  
36  
37  
38  
39  
40  
41  
42  
43  
44  
45  
46  
47  
48  
49  
50  
51  
52  
53  
54  
55  
56  
57  
58  
59  
60

## METHODS

### Study design

This was a retrospective, cross-sectional, observational study using a nationwide administrative database, Medical Data Vision (MDV; MDV Co., Ltd., Tokyo, Japan), with data collected from April 1, 2012, to September 30, 2020. The MDV database contains anonymized administrative data of more than 30 million patients from over 400 hospitals, which cover approximately 24% of all acute care hospitals in Japan. The MDV database includes claims data and discharge abstract data collected from inpatient and outpatient visits.

### Study ethics

This study utilized de-identified data from the MDV database and ethics approval was not required, in line with the Ethical Guidelines for Epidemiological Research from the MHLW, Japan. Therefore, no ethics or institution review board approval was obtained.

### Patient selection

In this study, patients admitted to general wards and ICUs were included. Patients meeting the prespecified delirium identification algorithm criteria who were hospitalized for surgery or an emergency and those who were discharged, transferred to other hospitals, or died after hospitalization during the study period were included in the analyzed data set.

The delirium identification algorithm in this study was based on that recently reported by Kim et al. [22]. Kim et al. proposed an algorithm that defines delirium based on ICD diagnosis codes or antipsychotic use and has a modestly better profile (30% sensitivity; 97% specificity) than existing algorithms such as either ICD diagnosis codes alone or antipsychotic use alone. In this study, patients were identified and included as the study participants based on the following criteria: a confirmed diagnosis of delirium during hospitalization, coded as F05 per ICD-10 (criterion 1) or prescription of at least one antipsychotic agent (haloperidol, olanzapine, perospirone, quetiapine, or risperidone) between the index date (admission date) and the next 7 days (criterion 2). The algorithm was modified to adjust with the clinical setting in Japan. Patients with a minimum stay of 3 days, including at least 2 antipsychotic-free days, were included in the study [23]. This “two-day washout” period after hospitalization allowed the exclusion of patients who already had a prescription of the selected antipsychotic because of pre-existing conditions. Patients who were hospitalized for less than 3 days; who had schizophrenia spectrum disorder (F20-29 codes per ICD-10), bipolar disorder (F30-31 codes per ICD-10), or delirium (F05 code per ICD-10) as “admission-precipitating diagnosis” or “comorbidities present on admission;” who were prescribed antipsychotics on the hospitalization date or the next day; and who were prescribed olanzapine in combination with cisplatin for nausea within 1 week from the index date were excluded from the analyses.

Patients hospitalized multiple times were evaluated only at the first hospitalization when the inclusion criteria were met. Repeated episodes of delirium in the same patient were not tracked or included in the analysis. The observation period was from the index date (date of hospitalization) to the end of hospitalization, defined as discharge, hospital transfer, or death of the patient.

## Outcomes

The following demographic and baseline characteristics, clinical profiles, and comorbidities of patients with delirium were assessed from the MDV database: patients' baseline characteristics (sex, age, activities of daily living score calculated using the Barthel Index [29] cognitive impairment [assessed as "present" if the patient was previously diagnosed with dementia or prescribed anti-dementia medications or had a low degree of independence]), inpatient departments, comorbidities, type of clinical practice (delirium-associated PIM use [identified based on the Beers Criteria,[30] the Guidelines for medical treatment and its safety in the elderly from the Japan Geriatrics Society Working Group,[31] and the report from Noshiro et al.,[32]) type of surgery [sites or duration of anesthesia], duration of hospitalization and ICU stay), hospitalization information (type of hospitalization [surgery or emergency hospitalization], number of beds), prescription pattern for each antipsychotic, and patient outcomes (transfer to other hospitals/nursing homes, death).

## Statistical analysis

The aim of this study was descriptive; therefore, no sample size calculations were performed. Data were summarized as mean (standard deviation [SD]) or number and frequency (%). All statistical analyses were performed using SAS ver. 9.4 (SAS Institute Inc., Cary, NC, USA).

## Sensitivity analysis

As many assumptions were made while creating the delirium identification algorithm, two sensitivity analyses were conducted for patients selected in the main analyses to confirm how different assumptions on the analyzed populations might have influenced the outcomes. As some patients could have undergone surgery several days after their admission and the criteria used to identify patients to be included in the main analysis do not allow their inclusion, patients who had a prescription of any of the "selected" antipsychotics between the 3rd day of hospitalization and the day of discharge (or transfer or death) were included in the sensitivity analysis 1 (SA1). Furthermore, as some patients may undergo surgery immediately after the emergency admission and have delirium on the next day and the criteria set for the main analysis do not allow their inclusion, patients who had a prescription of the specified antipsychotics between the 2nd and 8th day of hospitalization were included in the sensitivity analysis 2 (SA2).

## Patient and public involvement

Patients were not involved in any phase of this retrospective study, and data were collected from de-identified administrative claims database.

## RESULTS

### Identification of patients with delirium

Of the 32,910,227 patients who were included in the MDV database during the study period, 145,219 were identified as having delirium (Figure 1). Among patients who were hospitalized for surgery or an emergency (n=7,221,643), 2.0% were identified as having delirium. Overall, 9,898 (6.8%) patients who met the delirium identification algorithm criteria were diagnosed with delirium based on ICD-10 codes and did not receive any of the selected antipsychotic treatments during their hospitalization; 128,095 (88.2%) patients were identified because they had been prescribed any of the selected antipsychotics, and 7,226 (5.0%) patients who met the delirium identification algorithm criteria had both a diagnosis of delirium and an antipsychotic prescription (Figure 1). Most (n=14,801; 86.4%) of the 17,124 patients with an ICD-10 coded diagnosis had “delirium” (code F05.9), followed by “nocturnal delirium” (code F05.9), “delirium superimposed on dementia” (code F05.1), and “delirium not superimposed on dementia” (code F05.0; Supplemental Table 1).

### Patient demographics and baseline characteristics

Mean (SD) patient age was 76.5 (13.8) years, and approximately 65% of patients were  $\geq 75$  years of age; more than 50% (n=82,159) of patients were male. Approximately half (n=76,422; 52.6%) of the patients with delirium were categorized as “dependent (need someone’s help)” based on the Barthel Index score (Table 1). Cognitive impairment was noted in 40,376 (27.8%) patients (Table 1; Supplemental Table 2). Circulatory disease was the most common comorbidity, observed in 81,954 (56.4%) patients, followed by endocrine, nutritional, and metabolic diseases (n=59,955; 41.3%) and gastrointestinal disorders (n=59,691; 41.1%; Table 1; Supplemental Table 3).

### Clinical practice

Around half (n=85,492; 58.9%) of the patients with delirium underwent any surgery, of whom approximately one-third (n=28,557) were anesthetized for more than 2 hours (Table 2). There was a wide distribution of surgical sites, with the abdomen being the most common site (n=38,898; 26.8%; Supplemental Table 4).

Mean (SD) duration of hospitalization was 16.0 (12.1) days; 55,709 (38.4%) patients were hospitalized for 1–2 weeks (Table 2). Overall, 33,718 (23.2%) patients were admitted to the ICU for a mean (SD) of 3.4 (3.1) days, of whom 4,379 (3.0%) spent at least 7 days in the ICU (Table 2).

PIMs were prescribed to 76,798 (52.9%) patients, including benzodiazepines in 31,324 (21.6%) patients and opioids in 29,268 (20.2%) patients. Approximately three-fourths (n=56,949; 74.2%) of these patients were prescribed  $\geq 4$  PIMs. Multiple classes of PIMs were used by 38.6% of patients to whom PIMs were prescribed (Table 2).

### Treatment for delirium

Injectable haloperidol was the most prescribed antipsychotic (n=82,490; 56.8%) for the treatment of delirium, followed by risperidone solution (n=34,282; 23.6%), quetiapine tablet (n=19,830; 13.7%), risperidone orodispersible tablet (n=7,645; 5.3%), and risperidone tablet (n=4,958; 3.4%; Table 3). The mean (SD) duration of these antipsychotic prescriptions was 5.4 (8.1) days (Table 3).

## Hospitalizations and patient outcome

Assessment of patients with delirium by hospital department showed that the departments where at least 5% of patients experienced delirium were surgery (n=28,656; 19.7%), internal medicine (n=28,232; 19.4%), gastroenterology (n=15,445; 10.6%), cardiology (n=12,337; 8.5%), orthopedics (n=11,302; 7.8%), and neurosurgery (n=8,144; 5.6%; Table 1; Supplemental Table 4). In general, 52,766 (36.3%) patients with delirium were hospitalized for planned elective surgery, whereas 59,727 (41.1%) patients were hospitalized due to an emergency (without subsequent surgery) and 32,726 (22.5%) patients were hospitalized due to an emergency and underwent surgery (Supplemental Table 4). A total of 15,556 (10.7%) patients died while in hospital, and 22,081 (15.2%) were transferred to other hospitals or clinics (Table 4).

## Sensitivity analysis

The results of the sensitivity analyses identified 184,817 patients with delirium in SA1 and 213,844 in SA2 (Supplemental Figure 1). Patients' mean (SD) age was 76.1 (13.8) years in SA1 and 76.3 (14.1) years in SA2. A total of 96,591 (52.3%) patients in SA1 and 113,005 (52.8%) patients in SA2 were classified as dependent (Supplemental Table 5).

The proportion of patients prescribed one or more antipsychotics to treat their delirium was 95.5% in SA1 and 95.4% in SA2. The proportion of injectable haloperidol prescriptions was 58.1% in SA1 and 60.1% in SA2, while the proportion of prescriptions for risperidone solution was 24.8% in SA1 and 23.5% in SA2 and that for risperidone tablets was 4.0% in SA1 and 3.5% in SA2 (Supplemental Table 5).

## DISCUSSION

The present study was the first nationwide database study that assessed the clinical characteristics of patients with delirium in acute care hospitals in Japan. To identify patients with delirium from the hospital database, the study used the delirium identification algorithm which consists of diagnoses based on ICD-10 codes and prescriptions of antipsychotics frequently used in the treatment of delirium.[22] The prevalence of delirium obtained in our study was 2.0% among patients who were hospitalized for surgery or an emergency, which was lower than the incidence of new delirium per admission (3%–29%) reported in a systematic review of the literature.[4] The low prevalence of delirium determined using our criteria might be due to the sensitivity of the algorithm used in our study; however, it also suggests issues such as the lack of awareness of delirium among many physicians and inability to manage delirium appropriately.

In our study, most patients were  $\geq 65$  years of age (84.7%), 27.8% of patients had cognitive impairment, and 52.6% had functional dependence, which are known predisposing factors of delirium.[8,33] Approximately one-fourth (23.2%) of the patients included in this study were admitted to the ICU during the index hospitalization period. Although we did not assess the prevalence of delirium in patients in the ICU in this study, previous studies have shown a high incidence (70%–87%) of delirium in patients in the ICU,[34] suggesting that the management of delirium in these patients is also important for physicians and nurses. While about half of the patients ( $n=85,492$ ; 58.9%) in the present study underwent surgery during their hospital stay, delirium was also identified among nonsurgical patients in general medical wards such as internal medicine, gastroenterology, and cardiology. A systematic literature review reported the prevalence of delirium among patients admitted to general medical and geriatric wards as 18%–35%.[8] Taken together, these data suggest that physicians and nurses from all clinical departments should be trained to diagnose and manage patients with delirium.

Drug classes such as benzodiazepines, opioids, and H2 blockers were selected as PIMs, which are reported to be associated with the onset of delirium in guidelines[30,31] and several studies.[32,33,35–37] In our study, more than half (52.9%) of the patients were prescribed a PIM of any type; approximately one-fifth of patients were prescribed either benzodiazepines or opioids (21.6% and 20.2%, respectively). Benzodiazepine and opioids are associated with an increased risk of delirium in medical and surgical patients.[35] In a single center study in Canada, the risk was more than doubled within 28 days of hospitalization in patients with cancer who were receiving benzodiazepines ( $>2$  mg/day) and opioids ( $>90$  mg/day).[38] Moreover, Japan is one of the countries with an increasing rate of consumption of benzodiazepine-type sedative hypnotics ( $>1$  defined daily dose for statistical purposes).[39] Furthermore, at least 4 PIMs were prescribed in 74.2% of patients with delirium. Polypharmacy with  $\geq 3$  drugs is reported to increase the risk of delirium by 2.9 times in elderly patients during hospitalization.[40] Our findings suggest that polypharmacy with PIMs such as benzodiazepines/opioids, a known precipitating factor for delirium, is commonly observed in a real-world clinical setting. The frequent use of PIMs that increase the risk of delirium in the real world, particularly in elderly patients, reaffirms the need for the better understanding of the benefit-risk profile of such medications. On the other hand, opioids are necessary for the control of severe pain. Pain is also known to be associated with a risk of delirium[16] thus, suggesting the importance of delirium control in combination with pain control.

1  
2  
3 In our study, injectable haloperidol was the most frequently prescribed (56.8%) antipsychotic,  
4 followed by risperidone solution (23.6%) and quetiapine tablets (13.7%) in patients with  
5 delirium. The outcomes are similar to those from a recent database study in Japan, where  
6 haloperidol infusion was the most frequently used treatment in postoperative patients with  
7 delirium.[17] These results are also consistent with a questionnaire-based cross-sectional  
8 study in which more than two-thirds of Japanese experts recommended intravenous  
9 haloperidol (if an intravenous line was placed during hospitalization), and the oral use of  
10 atypical antipsychotics such as risperidone or quetiapine for hyperactive delirium.[41]  
11 Risperidone solution and olanzapine orodispersible tablets could be useful for patients who  
12 have difficulties in taking medicines.[16] In our study, a relatively high proportion of patients  
13 were prescribed risperidone solution (23.6%); however, only 0.6% were prescribed  
14 olanzapine orodispersible tablets. The low proportion of olanzapine prescription could be due  
15 to the long half-life of olanzapine and its contraindication in patients with diabetes in  
16 Japan.[16] Overall, our findings suggest that injectable haloperidol is the major treatment  
17 modality for delirium in an acute care setting likely because it can be used as needed for the  
18 treatment of delirium in such a setting. Unlike psychiatrists, the majority of physicians who  
19 treat patients with delirium are likely to be unfamiliar with use of atypical antipsychotics.  
20 However, in a broader clinical context, the risk of death in the elderly was reported to be  
21 2.26-fold higher with haloperidol versus olanzapine[42], and the likelihood of overall  
22 survival was 1.73-fold higher with placebo in a randomized control trial.[43] Moreover, the  
23 incidence of adverse events, particularly extrapyramidal symptoms, is reportedly higher with  
24 haloperidol versus risperidone, although their efficacy is reportedly similar.[44,45]

25  
26  
27  
28  
29  
30 The greatest strength of this study is the large size of the MDV database, which enabled the  
31 identification of a large number of patients with delirium. The use of our algorithm optimized  
32 for the Japanese clinical setting led to an increased number of patients being retrieved from  
33 hospital databases, thus highlighting the utility of this algorithm in real-world scenarios.  
34 More importantly, outcomes of the sensitivity analyses, which considered different treatment  
35 time frames in determining index, were consistent with those of the main analysis reinforcing  
36 the robustness of our study results. The prevalence of delirium obtained by identifying  
37 patients using an ICD-coded diagnosis was only 0.2% among patients who were hospitalized  
38 for surgery or an emergency in our study, which is similar to that reported in previous studies  
39 in Japan.[18,24] However, this low prevalence may not be a true reflection of the occurrence  
40 of delirium in the real world, as observed in a prospective study that compared the sensitivity  
41 and specificity of various delirium identification algorithms.[22] According to Sakakibara et  
42 al., delirium is recorded on the claims receipt only for patients with severe delirium requiring  
43 more medical resources, but not for those with mild-to-moderate delirium.[24] Our results  
44 confirm that the majority of Japanese patients with delirium can be identified from a Japanese  
45 claims database based on prescription of an antipsychotic during their hospital stay; 88.2% of  
46 patients with delirium were identified based on an antipsychotic prescription. A recent study  
47 employing a Japanese national inpatient database used the daily nursing necessity score  
48 (dangerous behavior or misunderstanding of nursing instructions) as the criterion of delirium,  
49 but reported a prevalence of delirium of approximately 1% (n=21,182) among 2,070,000  
50 postoperative patients.[17] The results of the present study show the feasibility of using  
51 administrative databases for identifying patients with delirium in an acute care hospital  
52 setting in Japan.

53  
54  
55  
56  
57 This study has several limitations. First, the data were extracted from the MDV database,  
58 which is designed primarily for insurance purposes and not for research; therefore, no quality  
59 checks for data are performed and there is a likelihood of misclassification of ICD-10 coding.  
60 Second, as the data of patients transferred to other hospitals were not registered in this

1  
2  
3 database, patients who were moved to or hospitalized in a different hospital after the index  
4 hospitalization could not be identified. This could have led to multiple hospitalizations of the  
5 same high-risk patients, with multiple episodes of delirium at different times being identified  
6 as separate events and possibly increasing the number of identified cases. Third, the number  
7 of prescribed antipsychotics may be inflated because some patients with psychotic disorders  
8 may have been included from the database during analysis although the present study  
9 excluded patients with schizophrenia or bipolar disease. Lastly, the sensitivity and specificity  
10 of the modified delirium identification algorithm used in this study have not yet been  
11 validated in Japan. The recent addition of a medical fee for the care of high-risk patients with  
12 delirium in the medical reimbursement revision of 2020 in Japan may increase the accuracy  
13 of identification of patients with delirium from the medical database. For future research, the  
14 delirium identification algorithm used in our study needs to be validated.  
15  
16

17  
18 In conclusion, the results of the present study provide comprehensive details of the clinical  
19 characteristics of patients with delirium and treatment patterns with antipsychotics in the  
20 Japanese acute care setting. The results reinforce the need to consider the risk of delirium in  
21 hospitals, especially in high-risk patients, and provide useful information for healthcare  
22 professionals to understand the clinical profile of patients who are likely to experience  
23 delirium when hospitalized. The study reveals two important findings in this patient  
24 population: 1) the high prescription rate of injectable haloperidol and 2) the frequent use of  
25 PIMs in patients with delirium. Thus, there is a need for improved understanding among  
26 healthcare providers about appropriate management of delirium in an acute care setting,  
27 which may benefit patients.  
28  
29  
30  
31  
32  
33  
34  
35  
36  
37  
38  
39  
40  
41  
42  
43  
44  
45  
46  
47  
48  
49  
50  
51  
52  
53  
54  
55  
56  
57  
58  
59  
60



## COMPETING INTERESTS

NU, MI, KO, HS, KT, ST and SO are employees of MSD K.K., Tokyo, Japan, a subsidiary of Merck & Co., Inc., Kenilworth, NJ, USA and may own stock and/or hold stock options in Merck & Co., Inc., Kenilworth, NJ, USA. ZPQ is an employee of Merck Sharp & Dohme Corp., a subsidiary of Merck & Co., Inc., Kenilworth, NJ, USA and may own stock and/or hold stock options in Merck & Co., Inc., Kenilworth, NJ, USA. AO and YO have received funding from MSD K.K., Tokyo, Japan for research consulting.

## ACKNOWLEDGMENTS

The authors thank Andrea Rossi and Deepali Garg of Cactus Life Sciences (part of Cactus Communications) for medical writing of manuscript and editorial assistance, which was funded by MSD K.K., Tokyo, Japan, and Shinya Miura, Hideaki Ogawa and Shinichiro Suzuki of CMIC Co., Ltd. for medical writing of protocol and data analysis under the guidance and approval of MSD K.K., Tokyo Japan.

## FUNDING

This work was supported by MSD K.K., Tokyo, Japan. The funder of the study was involved in the development of the study design, data analysis, data interpretation, writing of the manuscript, and the decision to submit the manuscript for publication. All authors had full access to the study results.

## AUTHOR CONTRIBUTIONS

SO, HS, KT, ZPQ, ST, AO and YO conceptualized the study. NU, MI, KO, and SO conducted the study designing and data analysis planning. HS, KT, ZPQ, and ST contributed to the study designing. KT, AO, and YO provided advice on study design and contributed to the interpretation of the findings from the viewpoint of the clinical scientist, the physician and the epidemiologist, respectively. All authors contributed to interpretation of data and approved the final version of the manuscript. NU and SO are guarantors and accept full responsibility for the work.

## DATA SHARING STATEMENT

The Medical Data Vision database analyzed in this study is not publicly accessible, and the data cannot be shared with external researchers according to the contract with Medical Data Vision Co., Ltd.

**Table 1 Patient demographic and baseline characteristics.**

|                                   |                            | Number of patients<br>N (%) |        |
|-----------------------------------|----------------------------|-----------------------------|--------|
| Number of patients                |                            | 145,219                     |        |
| Age (years)                       | Mean (SD)                  | 76.5 (13.8)                 |        |
|                                   | ≤64                        | 22,168                      | (15.3) |
|                                   | 65–74                      | 28,371                      | (19.5) |
|                                   | 75–84                      | 49,739                      | (34.3) |
|                                   | ≥85                        | 44,941                      | (30.9) |
| Sex                               | Male                       | 82,159                      | (56.6) |
|                                   | Female                     | 63,060                      | (43.4) |
| ADL score (point)*                | Dependent group (0–59)     | 76,422                      | (52.6) |
|                                   | Independent group (60–100) | 66,381                      | (45.7) |
|                                   | Unknown                    | 2,416                       | (1.7)  |
| Cognitive impairment <sup>†</sup> | Yes                        | 40,376                      | (27.8) |
|                                   | No                         | 104,843                     | (72.2) |
| Inpatient department              | Surgery                    | 28,656                      | (19.7) |
|                                   | Internal Medicine          | 28,232                      | (19.4) |
|                                   | Gastroenterology           | 15,445                      | (10.6) |
|                                   | Cardiology                 | 12,337                      | (8.5)  |
|                                   | Orthopedics                | 11,302                      | (7.8)  |
|                                   | Neurosurgery               | 8,144                       | (5.6)  |
|                                   | Urology                    | 7,031                       | (4.8)  |
|                                   | Cardiovascular Surgery     | 6,042                       | (4.2)  |
|                                   | Respiratory Medicine       | 5,506                       | (3.8)  |
|                                   | Gastrointestinal Surgery   | 4,093                       | (2.8)  |
|                                   | Emergency Medicine         | 3,414                       | (2.4)  |

|                                      |                                                |        |        |
|--------------------------------------|------------------------------------------------|--------|--------|
|                                      | Neurology                                      | 3,008  | (2.1)  |
|                                      | Others                                         | 11,573 | (8.0)  |
| <hr/>                                |                                                |        |        |
| Comorbidities                        | Circulatory disease                            | 81,954 | (56.4) |
| (ICD-10 major category) <sup>‡</sup> | Endocrine, nutritional, and metabolic diseases | 59,955 | (41.3) |
|                                      | Gastrointestinal disorders                     | 59,691 | (41.1) |
|                                      | Malignant neoplasms                            | 41,710 | (28.7) |
|                                      | Respiratory disease                            | 36,958 | (25.4) |

\*Barthel Index will be used for evaluation.

<sup>†</sup>Cognitive Impairment was assessed as “present” if the patient was previously diagnosed with dementia or prescribed anti-dementia drugs or had a low degree of independence.

<sup>‡</sup>Top 5 major ICD-10 categories are presented.

ADL, activity of daily living; ICD-10, International Classification of Diseases, 10th revision; SD, standard deviation.

**Table 2 Clinical practice.**

|                                                                            |                         | <b>Number of patients<br/>N (%)</b> |         |
|----------------------------------------------------------------------------|-------------------------|-------------------------------------|---------|
| Number of patients                                                         |                         | 145,219                             |         |
| Prescription of PIM                                                        | Yes (any type of PIM)   | 76,798                              | (52.9)  |
|                                                                            | Antidepressants         | 299                                 | (0.2)   |
|                                                                            | Anticholinergic drugs   | 163                                 | (0.1)   |
|                                                                            | Benzodiazepines         | 31,324                              | (21.6)  |
|                                                                            | Non-benzodiazepines     | 10,582                              | (7.3)   |
|                                                                            | Corticosteroids         | 16,879                              | (11.6)  |
|                                                                            | H1-receptor antagonists | 10,283                              | (7.1)   |
|                                                                            | H2-receptor antagonists | 17,360                              | (12.0)  |
|                                                                            | Opioids                 | 29,268                              | (20.2)  |
|                                                                            | Number of PIMs (drugs)  | 76,798                              | (100.0) |
|                                                                            | 1                       | 5,268                               | (6.9)   |
|                                                                            | 2                       | 7,232                               | (9.4)   |
|                                                                            | 3                       | 7,349                               | (9.6)   |
|                                                                            | ≥4                      | 56,949                              | (74.2)  |
| Number of PIMs (classes)                                                   | 76,798                  | (100.0)                             |         |
| 1                                                                          | 47,128                  | (61.4)                              |         |
| 2                                                                          | 21,637                  | (28.2)                              |         |
| 3                                                                          | 6,561                   | (8.5)                               |         |
| ≥4                                                                         | 1,472                   | (1.9)                               |         |
| Surgery                                                                    | Yes                     | 85,492                              | (58.9)  |
| Anesthesia type/duration:                                                  |                         | 85,492                              | (100.0) |
| Surgery + no<br>anesthesia/local<br>anesthesia/light general<br>anesthesia |                         | 35,048                              | (41.0)  |

|                                    |                                                |        |        |
|------------------------------------|------------------------------------------------|--------|--------|
|                                    | Surgery + general anesthesia (<2 hours)        | 21,887 | (25.6) |
|                                    | Surgery + general anesthesia ( $\geq$ 2 hours) | 28,557 | (33.4) |
| <hr/>                              |                                                |        |        |
| Duration of hospitalization (days) | Mean (SD)                                      | 16.0   | (12.1) |
| <hr/>                              |                                                |        |        |
|                                    | $\leq$ 1 week                                  | 22,542 | (15.5) |
|                                    | >1 week to $\leq$ 2 weeks                      | 55,709 | (38.4) |
|                                    | >2 weeks to $\leq$ 3 weeks                     | 38,342 | (26.4) |
|                                    | >3 weeks to $\leq$ 4 weeks                     | 17,004 | (11.7) |
|                                    | 4> weeks to $\leq$ 12 weeks                    | 11,046 | (7.6)  |
|                                    | >12 weeks                                      | 576    | (0.4)  |
| <hr/>                              |                                                |        |        |
| Use of ICU                         | Yes                                            | 33,718 | (23.2) |
| <hr/>                              |                                                |        |        |
| Duration of ICU (days)             | Mean (SD)                                      | 3.4    | (3.1)  |
| <hr/>                              |                                                |        |        |
|                                    | 1 day                                          | 12,218 | (8.4)  |
|                                    | 2 days                                         | 5,970  | (4.1)  |
|                                    | 3 days                                         | 4,247  | (2.9)  |
|                                    | 4 days                                         | 3,104  | (2.1)  |
|                                    | 5 days                                         | 2,192  | (1.5)  |
|                                    | 6 days                                         | 1,608  | (1.1)  |
|                                    | $\geq$ 7 days                                  | 4,379  | (3.0)  |

ICU, intensive care unit; PIM, potentially inappropriate medication; SD, standard deviation.

**Table 3 Antipsychotics used for treating delirium.**

|                                           |             |           | Number of patients<br>N (%) |        |
|-------------------------------------------|-------------|-----------|-----------------------------|--------|
| Number of patients                        |             |           | 145,219                     |        |
| Antipsychotics used for delirium Yes      |             |           | 135,321 (93.2)              |        |
| Type of drug formulation                  | Haloperidol | INJ       | 82,490                      | (56.8) |
|                                           |             | TAB       | 1,913                       | (1.3)  |
|                                           |             | FGR       | 192                         | (0.1)  |
|                                           |             | SOL       | 13                          | (0.0)  |
|                                           | Risperidone | SOL       | 34,282                      | (23.6) |
|                                           |             | ODT       | 7,645                       | (5.3)  |
|                                           |             | TAB       | 4,958                       | (3.4)  |
|                                           |             | FGR       | 257                         | (0.2)  |
|                                           |             | INJ       | 6                           | (0.0)  |
|                                           | Quetiapine  | TAB       | 19,830                      | (13.7) |
|                                           |             | FGR       | 652                         | (0.4)  |
|                                           |             | SRT       | 20                          | (0.0)  |
|                                           | Olanzapine  | TAB       | 2,262                       | (1.6)  |
|                                           |             | ODT       | 915                         | (0.6)  |
| FGR                                       |             | 156       | (0.1)                       |        |
| INJ                                       |             | 11        | (0.0)                       |        |
| Perospirone                               | TAB         | 2,210     | (1.5)                       |        |
| Duration of prescription (days) Mean (SD) |             | 5.4 (8.1) |                             |        |

FGR, fine granule; INJ, injectable; ODT, orodispersable tablet; SD, standard deviation; SOL, solution; SRT, sustained-release tablet; TAB, tablet.

**Table 4 Patient outcome - Transfer to other hospitals/nursing homes and death.**

|                                              |                                                                                          | <b>Number of patients<br/>N (%)</b> |  |
|----------------------------------------------|------------------------------------------------------------------------------------------|-------------------------------------|--|
| Number of patients                           |                                                                                          | 145,219                             |  |
| Transfer to other<br>hospitals/nursing homes | Yes                                                                                      | 32,651 (22.5)                       |  |
|                                              | Transfer to other hospitals or clinics                                                   | 22,081 (15.2)                       |  |
|                                              | Admission to social welfare facilities or<br>fee-based homes for the elderly, etc.       | 5,070 (3.5)                         |  |
|                                              | Admission to facilities covered by public aid<br>providing long-term care to the elderly | 3,017 (2.1)                         |  |
|                                              | Admission to long-term care health facilities                                            | 2,472 (1.7)                         |  |
|                                              | Nursing home                                                                             | 11 (0.0)                            |  |
| Death                                        | Yes                                                                                      | 15,556 (10.7)                       |  |
|                                              | No                                                                                       | 129,637 (89.3)                      |  |

**FIGURE LEGENDS**

Figure 1 Patient selection flowchart.

DPC, Diagnosis Procedure Combination; ICD-10, International Classification of Diseases, 10th revision; MDV, Medical Data Vision.

Supplemental Figure 1 Patient selection flowchart for the sensitivity analysis.

MDV, Medical Data Vision.

For peer review only



## REFERENCES

- 1 American Psychiatric Association. Diagnostic And Statistical Manual Of Mental Disorders, Fifth Edition. Washington, DC: American Psychiatric Association Publishing 2013: 596-97.
- 2 Oh ES, Fong TG, Hshieh TT, et al. Delirium in older persons: advances in diagnosis and treatment. *JAMA* 2017;318:1161–74.
- 3 Pezzullo L, Streatfeild J, Hickson J, et al. Economic impact of delirium in Australia: a cost of illness study. *BMJ Open* 2019;9:e027514.
- 4 Siddiqi N, House AO, Holmes JD. Occurrence and outcome of delirium in medical in-patients: a systematic literature review. *Age Ageing* 2006;35:350–64.
- 5 Fricchione GL, Nejad SH, Esses JA, et al. Postoperative delirium. *Am J Psychiatry* 2008;165:803–12.
- 6 Marcantonio ER. Postoperative delirium: a 76-year-old woman with delirium following surgery. *JAMA* 2012;308:73–81.
- 7 Hshieh TT, Inouye SK, Oh ES. Delirium in the elderly. *Clin Geriatr Med* 2020;36:183–99.
- 8 Inouye SK, Westendorp RG, Saczynski JS. Delirium in elderly people. *Lancet* 2014;383:911–22.
- 9 Goldberg TE, Chen C, Wang Y, et al. Association of delirium with long-term cognitive decline: a meta-analysis. *JAMA Neurol* 2020;77:1373–81.
- 10 Inouye SK, Foreman MD, Mion LC, et al. Nurses' recognition of delirium and its symptoms: comparison of nurse and researcher ratings. *Arch Intern Med* 2001;161:2467–73.
- 11 Chen CC, Li HC, Liang JT, et al. Effect of a modified hospital elder life program on delirium and length of hospital stay in patients undergoing abdominal surgery: a cluster randomized clinical trial. *JAMA Surg* 2017;152:827–34.
- 12 Janssen TL, Alberts AR, Hooft L, et al. Prevention of postoperative delirium in elderly patients planned for elective surgery: systematic review and meta-analysis. *Clin Interv Aging* 2019;14:1095–117.
- 13 Ogawa A, Okumura Y, Fujisawa D, et al. Quality of care in hospitalized cancer patients before and after implementation of a systematic prevention program for delirium: the DELTA exploratory trial. *Support Care Cancer* 2019;27:557–65.
- 14 Whalin MK, Kreuzer M, Halenda KM, et al. Missed opportunities for intervention in a patient with prolonged postoperative delirium. *Clin Ther* 2015;37:2706–10.
- 15 About Insurance Medical Treatment Related to off-Label Use of Pharmaceutical Products. 2011. Accessed November 4, 2021. [https://www.hospital.or.jp/pdf/14\\_20110928\\_01.pdf](https://www.hospital.or.jp/pdf/14_20110928_01.pdf)
- 16 Clinical guideline for the treatment of delirium, 2nd edition (Japanese Society of General Hospital Psychiatry Practice Guidelines 1). Tokyo, Japan: Seiwa Shoten Publishers. PP1-32 & PP85-111
- 17 Noda Y, Tarasawa K, Fushimi K, et al. Drug treatment for patients with postoperative delirium and consultation-liaison psychiatry in Japan: a retrospective observational study of a nationwide hospital claims database. *ACE* 2021;3:116–26.
- 18 Ota K, Nakamura M, Makiuchi T, et al. Surveillance of antipsychotic drugs use in elderly patients with postoperative delirium (Japanese). In Proceedings of the The Annual Meeting of the Pharmaceutical Society of Japan. Annual meeting of the Pharmaceutical Society of Japan 2011.

- 1  
2  
3 19 McCoy TH, Jr., Snapper L, Stern TA, et al. Underreporting of Delirium in Statewide  
4 Claims Data: Implications for Clinical Care and Predictive Modeling.  
5 *Psychosomatics*. 2016;57:480–88.
- 6 20 Pal N, Abernathy JH, 3rd, Taylor MA, et al. Dexmedetomidine, delirium, and adverse  
7 outcomes: analysis of the Society of Thoracic Surgeons Adult Cardiac Surgery  
8 Database. *Ann Thorac Surg* 2021.
- 9 21 Ahn EJ, Kim HJ, Kim KW, et al. Comparison of general anaesthesia and regional  
10 anaesthesia in terms of mortality and complications in elderly patients with hip  
11 fracture: a nationwide population-based study. *BMJ Open* 2019;9:e029245.
- 12 22 Kim DH, Lee J, Kim CA, et al. Evaluation of algorithms to identify delirium in  
13 administrative claims and drug utilization database. *Pharmacoepidemiol Drug Saf*  
14 2017;26:945–53.
- 15 23 Park Y, Bateman BT, Kim DH, et al. Use of haloperidol versus atypical  
16 antipsychotics and risk of in-hospital death in patients with acute myocardial  
17 infarction: cohort study. *BMJ* 2018;360:k1218.
- 18 24 Sakakibara Y, Ochibe T, Amari S, et al. Study on the risk factors for postoperative  
19 delirium using the National Health Insurance Claims Database in Japan. *Jpn J Pharm*  
20 *Health Care Sci* 2019;45:195–207.
- 21 25 Zimmerman KM, Paquin AM, Rudolph JL. Antipsychotic prescription to identify  
22 delirium: results from two cohorts. *Clin Pharmacol* 2017;9:113–7.
- 23 26 Hope C, Estrada N, Weir C, et al. Documentation of delirium in the VA electronic  
24 health record. *BMC Res Notes* 2014;7:208.
- 25 27 Inouye SK, van Dyck CH, Alessi CA, et al. Clarifying confusion: the confusion  
26 assessment method. A new method for detection of delirium. *Ann Intern Med*  
27 1990;113:941–8.
- 28 28 Johnson JC, Kerse NM, Gottlieb G, et al. Prospective versus retrospective methods of  
29 identifying patients with delirium. *J Am Geriatr Soc* 1992;40:316–9.
- 30 29 Mahoney FI, Barthel DW. Functional Evaluation: The Barthel Index. *Md State Med J*.  
31 1965;14:61–65.
- 32 30 By the 2019 American Geriatrics Society Beers Criteria® Update Expert Panel.  
33 American Geriatrics Society 2019 Updated AGS Beers Criteria® for potentially  
34 inappropriate medication use in older adults. *J Am Geriatr Soc* 2019;67:674–94.
- 35 31 Kojima T, Mizukami K, Tomita N, et al. Screening tool for older persons' appropriate  
36 prescriptions for Japanese: report of the Japan Geriatrics Society Working Group on  
37 "Guidelines for medical treatment and its safety in the elderly". *Geriatr Gerontol Int*  
38 2016;16:983–1001.
- 39 32 Noshiro Y, Imai T, Sakai M, et al. Relationship between the onset of delirium during  
40 hospitalization and the use of high-risk drugs for delirium. *Med J Matsue City Hosp*  
41 2018;1.
- 42 33 Ahmed S, Leurent B, Sampson EL. Risk factors for incident delirium among older  
43 people in acute hospital medical units: a systematic review and meta-analysis. *Age*  
44 *Ageing* 2014;43:326–33.
- 45 34 Pisani MA, McNicoll L, Inouye SK. Cognitive impairment in the intensive care unit.  
46 *Clin Chest Med* 2003;24:727–37.
- 47 35 Inouye SK. Delirium in older persons. *N Engl J Med* 2006;354:1157–65.
- 48 36 Fujii S, Tanimukai H, Kashiwagi Y. Comparison and analysis of delirium induced by  
49 histamine h(2) receptor antagonists and proton pump inhibitors in cancer patients.  
50 *Case Rep Oncol* 2012;5:409–12.
- 51 37 Clegg A, Young JB. Which medications to avoid in people at risk of delirium: a  
52 systematic review. *Age Ageing* 2011;40:23–9.
- 53  
54  
55  
56  
57  
58  
59  
60

- 1  
2  
3 38 Gaudreau JD, Gagnon P, Harel F, et al. Psychoactive medications and risk of delirium  
4 in hospitalized cancer patients. *J Clin Oncol* 2005;23:6712–8.  
5  
6 39 International Narcotics Control Board, Vienna International Centre, Vienna, Austria:  
7 International Narcotics Control Board. Availability of Internationally Controlled  
8 Drugs: Ensuring Adequate Access for Medical and Scientific Purposes. 2015.  
9 Accessed November, 5 2021.  
10 [https://www.incb.org/documents/Publications/AnnualReports/AR2015/English/Suppl](https://www.incb.org/documents/Publications/AnnualReports/AR2015/English/Supplement-AR15_availability_English.pdf)  
11 [ement-AR15\\_availability\\_English.pdf](https://www.incb.org/documents/Publications/AnnualReports/AR2015/English/Supplement-AR15_availability_English.pdf).  
12  
13 40 Inouye SK, Charpentier PA. Precipitating factors for delirium in hospitalized elderly  
14 persons. Predictive model and interrelationship with baseline vulnerability. *JAMA*  
15 1996;275:852–7.  
16  
17 41 Okumura Y, Hatta K, Wada K, et al. Expert opinions on the first-line pharmacological  
18 treatment for delirium in Japan: a conjoint analysis. *Int Psychogeriatr* 2016;28:1041–  
19 50.  
20  
21 42 Hollis J, Grayson D, Forrester L, et al. Antipsychotic medication dispensing and risk  
22 of death in veterans and war widows 65 years and older. *Am J Geriatr Psychiatry*  
23 2007;15:932–41.  
24  
25 43 Agar MR, Lawlor PG, Quinn S, et al. Efficacy of oral risperidone, haloperidol, or  
26 placebo for symptoms of delirium among patients in palliative care: a randomized  
27 clinical trial. *JAMA Intern Med* 2017;177:34–42.  
28  
29 44 Boettger S, Jenewein J, Breitbart W. Haloperidol, risperidone, olanzapine and  
30 aripiprazole in the management of delirium: A comparison of efficacy, safety, and  
31 side effects. *Palliat Support Care* 2015;13:1079–85.  
32  
33 45 Miyaji S, Yamamoto K, Hoshino S, et al. Comparison of the risk of adverse events  
34 between risperidone and haloperidol in delirium patients. *Psychiatry Clin Neurosci*  
35 2007;61:275–82.  
36  
37  
38  
39  
40  
41  
42  
43  
44  
45  
46  
47  
48  
49  
50  
51  
52  
53  
54  
55  
56  
57  
58  
59  
60

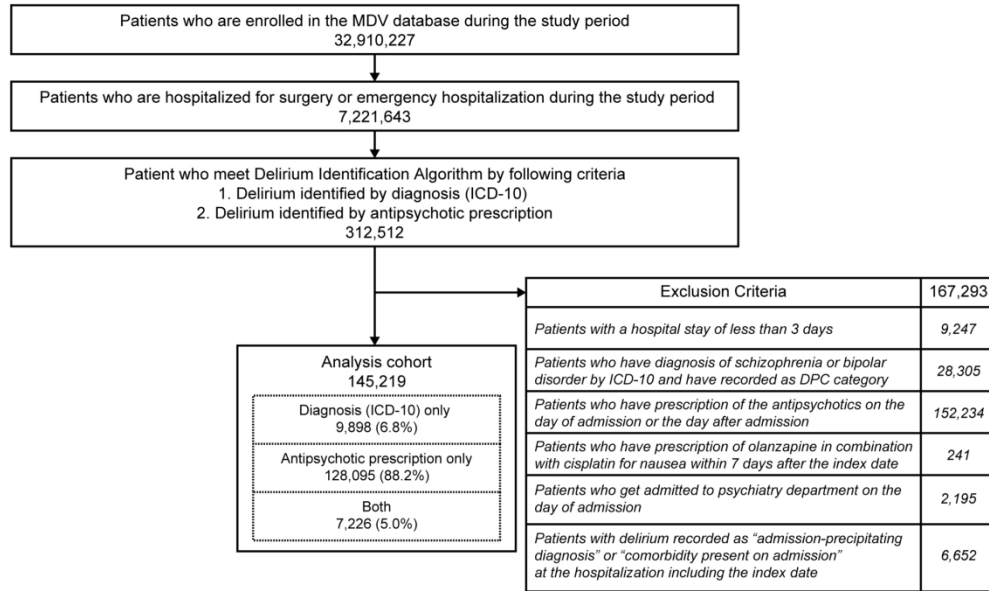

Figure 1 Patient selection flowchart. DPC, Diagnosis Procedure Combination; ICD-10, International Classification of Diseases, 10th revision; MDV, Medical Data Vision.

173x104mm (300 x 300 DPI)

**Supplemental Table 1 ICD-10 codes for delirium diagnosis.**

| Number of delirium patients identified by diagnosis (ICD-10) | Total                                         | Number of patients |        |
|--------------------------------------------------------------|-----------------------------------------------|--------------------|--------|
|                                                              |                                               | N                  | (%)    |
|                                                              | Total                                         | 17,124             | (11.8) |
|                                                              | Delirium not superimposed on dementia (F05.0) | 977                | (0.7)  |
|                                                              | Delirium superimposed on dementia (F05.1)     | 1,447              | (1.0)  |
|                                                              | Other delirium (F05.8)                        | 37                 | (0.0)  |
|                                                              | Subacute infection psychosis                  | 0                  | (0.0)  |
|                                                              | Subacute organic reaction                     | 0                  | (0.0)  |
|                                                              | Subacute organic psychiatric syndrome         | 0                  | (0.0)  |
|                                                              | Subacute cerebral syndrome                    | 5                  | (0.0)  |
|                                                              | Acute infectious psychosis                    | 1                  | (0.0)  |
|                                                              | Acute organic reaction                        | 3                  | (0.0)  |
|                                                              | Acute organic psychiatric syndrome            | 2                  | (0.0)  |
|                                                              | Acute confusional state                       | 14                 | (0.0)  |
|                                                              | Acute brain syndrome                          | 11                 | (0.0)  |
|                                                              | Nonalcoholic acute confusional state          | 1                  | (0.0)  |
|                                                              | Delirium, unspecified (F05.9)                 | 14,801             | (10.2) |
|                                                              | Delirium                                      | 11,828             | (8.1)  |
|                                                              | Nocturnal delirium                            | 2,494              | (1.7)  |
|                                                              | Senile nocturnal delirium                     | 498                | (0.3)  |

ICD-10, International Classification of Diseases, 10th revision.

**Supplemental Table 2 Definition of cognitive impairment.**

|                      |                                                                        | <b>Number of patients<br/>N (%)</b> |        |
|----------------------|------------------------------------------------------------------------|-------------------------------------|--------|
| Number of patients   |                                                                        | 145,219                             |        |
| Cognitive impairment | Yes                                                                    | 40,376                              | (27.8) |
|                      | Diagnosis of dementia (ICD-10)                                         | 21,498                              | (14.8) |
|                      | Prescription of anti-dementia drugs                                    | 12,032                              | (8.3)  |
|                      | Low degree of independence in daily life for the elderly with dementia | 25,537                              | (17.6) |

ICD-10, International Classification of Diseases, 10th revision.

**Supplemental Table 3 Comorbidities (diseases present in  $\geq 3\%$  of patients with delirium in each category).**

| Category                                       | Disease                                                      | ICD-10 | Number of patients<br>N (%) |
|------------------------------------------------|--------------------------------------------------------------|--------|-----------------------------|
| Number of patients                             |                                                              |        | 145,219                     |
| Circulatory disease                            |                                                              |        | 81,954 (56.4)               |
|                                                | Essential (primary) hypertension                             | I10    | 47,887 (33.0)               |
|                                                | Heart failure                                                | I50    | 23,214 (16.0)               |
|                                                | Atrial fibrillation and flutter                              | I48    | 12,774 (8.8)                |
|                                                | Angina pectoris                                              | I20    | 11,296 (7.8)                |
|                                                | Sequelae of cerebrovascular disease                          | I69    | 8,759 (6.0)                 |
|                                                | Cerebral infarction                                          | I63    | 6,577 (4.5)                 |
|                                                | Aortic aneurysm and dissection                               | I71    | 4,432 (3.1)                 |
| Endocrine, nutritional, and metabolic diseases |                                                              |        | 59,955 (41.3)               |
|                                                | Type 2 diabetes mellitus                                     | E11    | 23,809 (16.4)               |
|                                                | Disorders of lipoprotein metabolism and other lipidemia      | E78    | 17,530 (12.1)               |
|                                                | Volume depletion                                             | E86    | 13,698 (9.4)                |
|                                                | Other disorders of fluid, electrolyte, and acid-base balance | E87    | 4,896 (3.4)                 |
|                                                | Unspecified diabetes mellitus                                | E14    | 4,364 (3.0)                 |
| Gastrointestinal disorders                     |                                                              |        | 59,691 (41.1)               |
|                                                | Gastroesophageal reflux disease                              | K21    | 13,242 (9.1)                |
|                                                | Other functional intestinal disorders                        | K59    | 10,515 (7.2)                |
|                                                | Gastric ulcer                                                | K25    | 9,864 (6.8)                 |
|                                                | Cholelithiasis                                               | K80    | 8,230 (5.7)                 |
|                                                | Paralytic ileus and intestinal obstruction without hernia    | K56    | 5,276 (3.6)                 |

|       |                                                                  |     |        |        |
|-------|------------------------------------------------------------------|-----|--------|--------|
|       | Gastritis and duodenitis                                         | K29 | 5,025  | (3.5)  |
|       | Other diseases of the biliary tract                              | K83 | 4,850  | (3.3)  |
| <hr/> |                                                                  |     |        |        |
|       | Malignant neoplasms                                              |     | 41,710 | (28.7) |
|       | Malignant neoplasm of stomach                                    | C16 | 7,644  | (5.3)  |
|       | Malignant neoplasm of colon                                      | C18 | 7,163  | (4.9)  |
|       | Secondary malignant neoplasm of respiratory and digestive organs | C78 | 5,631  | (3.9)  |
|       | Malignant neoplasm of bronchus and lung                          | C34 | 4,433  | (3.1)  |
| <hr/> |                                                                  |     |        |        |
|       | Respiratory disease                                              |     | 36,958 | (25.4) |
|       | Respiratory failure, not elsewhere classified                    | J96 | 14,385 | (9.9)  |
|       | Pneumonia, organism unspecified                                  | J18 | 7,004  | (4.8)  |
|       | Pneumonitis due to solids and liquids                            | J69 | 6,991  | (4.8)  |
| <hr/> |                                                                  |     |        |        |
|       | Nervous system disorders                                         |     | 28,557 | (19.7) |
|       | Alzheimer disease                                                | G30 | 9,659  | (6.7)  |
|       | Sleep disorders                                                  | G47 | 9,351  | (6.4)  |
| <hr/> |                                                                  |     |        |        |
|       | Genitourinary diseases                                           |     | 25,617 | (17.6) |
|       | Chronic kidney disease                                           | N18 | 8,208  | (5.7)  |
|       | Benign prostatic hyperplasia                                     | N40 | 5,360  | (3.7)  |
| <hr/> |                                                                  |     |        |        |
|       | Mental and behavioral disorders                                  |     | 20,047 | (13.8) |
|       | Unspecified dementia                                             | F03 | 8,934  | (6.2)  |
| <hr/> |                                                                  |     |        |        |
|       | Musculoskeletal / connective tissue disease                      |     | 17,523 | (12.1) |
| <hr/> |                                                                  |     |        |        |
|       | Injury                                                           |     | 15,866 | (10.9) |
|       | Fracture of femur                                                | S72 | 6,427  | (4.4)  |
| <hr/> |                                                                  |     |        |        |
|       | Blood disease                                                    |     | 13,458 | (9.3)  |
|       | Iron deficiency anemia                                           | D50 | 6,881  | (4.7)  |



|                                                        |     |        |        |
|--------------------------------------------------------|-----|--------|--------|
| Infectious disease<br>(excluding parasitic<br>disease) | -   | 12,442 | (8.6)  |
| Skin/subcutaneous tissue<br>disease                    | -   | 4,094  | (2.8)  |
| Eye disease                                            | -   | 1,565  | (1.1)  |
| Poisoning                                              | -   | 806    | (0.6)  |
| Ear disease                                            | -   | 624    | (0.4)  |
| Others                                                 |     | 39,232 | (27.0) |
| Somnolence, stupor, and coma                           | R40 | 6,943  | (4.8)  |

ICD-10, International Classification of Diseases, 10th revision.

**Supplemental Table 4 Hospitalization information.**

|                         |                                           | Number of patients<br>N (%) |        |
|-------------------------|-------------------------------------------|-----------------------------|--------|
| Number of patients      |                                           | 145,219                     |        |
| Type of hospitalization | Hospitalization with elective surgery     | 52,766                      | (36.3) |
|                         | Emergency hospitalization without surgery | 59,727                      | (41.1) |
|                         | Emergency hospitalization with surgery    | 32,726                      | (22.5) |
| Number of beds          | 0–199 beds                                | 6,760                       | (4.7)  |
|                         | 200–499 beds                              | 79,995                      | (55.1) |
|                         | ≥500 beds                                 | 58,464                      | (40.3) |
| Inpatient department    | Surgery                                   | 28,656                      | (19.7) |
|                         | Internal Medicine                         | 28,232                      | (19.4) |
|                         | Gastroenterology                          | 15,445                      | (10.6) |
|                         | Cardiology                                | 12,337                      | (8.5)  |
|                         | Orthopedics                               | 11,302                      | (7.8)  |
|                         | Neurosurgery                              | 8,144                       | (5.6)  |
|                         | Urology                                   | 7,031                       | (4.8)  |
|                         | Cardiovascular Surgery                    | 6,042                       | (4.2)  |
|                         | Respiratory Medicine                      | 5,506                       | (3.8)  |
|                         | Gastrointestinal Surgery                  | 4,093                       | (2.8)  |
|                         | Emergency Medicine                        | 3,414                       | (2.4)  |
|                         | Neurology                                 | 3,008                       | (2.1)  |
|                         | Pulmonary Surgery                         | 1,734                       | (1.2)  |
| Obstetrics & Gynecology | 1,528                                     | (1.1)                       |        |
| Otolaryngology          | 1,416                                     | (1.0)                       |        |
| Nephrology              | 1,252                                     | (0.9)                       |        |
| Hematology              | 729                                       | (0.5)                       |        |

|         |                                                |        |        |
|---------|------------------------------------------------|--------|--------|
|         | Endocrinology, Metabolism & Diabetology        | 706    | (0.5)  |
|         | Reconstructive Surgery                         | 625    | (0.4)  |
|         | Ophthalmology                                  | 606    | (0.4)  |
|         | Others                                         | 2,977  | (2.1)  |
|         | Unknown                                        | 436    | (0.3)  |
| <hr/>   |                                                |        |        |
| Surgery | Yes                                            | 85,492 | (58.9) |
|         | Surgery sites:                                 |        |        |
|         | Abdomen                                        | 38,898 | (26.8) |
|         | Heart and blood vessels                        | 15,240 | (10.5) |
|         | Musculoskeletal system, extremities, and trunk | 10,424 | (7.2)  |
|         | Thoracic                                       | 6,061  | (4.2)  |
|         | Urinary system and adrenal glands              | 4,893  | (3.4)  |
|         | Nervous system and cranial                     | 3,708  | (2.6)  |
|         | Skin or subcutaneous tissue                    | 3,076  | (2.1)  |
|         | Genital                                        | 2,557  | (1.8)  |
|         | Ear, nose, and throat                          | 1,113  | (0.8)  |
|         | Face, mouth, and neck                          | 738    | (0.5)  |
|         | Eyes                                           | 606    | (0.4)  |
| <hr/>   |                                                |        |        |

**Supplemental Table 5 Sensitivity analyses: Delirium identification algorithm, patient characteristics, clinical practice, delirium treatment with antipsychotics, and patient outcomes.**

| Characteristics                                         |                                     | Sensitivity analysis 1 |        | Sensitivity analysis 2 |        |
|---------------------------------------------------------|-------------------------------------|------------------------|--------|------------------------|--------|
|                                                         |                                     | N (%)                  |        | N (%)                  |        |
| Number of subjects                                      |                                     | 184,817                |        | 213,844                |        |
| <b>Delirium identification algorithm</b>                |                                     |                        |        |                        |        |
| Patients meeting criteria                               | Diagnosis (ICD-10) only             | 8,401                  | (4.5)  | 9,874                  | (4.6)  |
|                                                         | Antipsychotic prescription only     | 167,756                | (90.8) | 193,507                | (90.5) |
|                                                         | Both                                | 8,660                  | (4.7)  | 10,463                 | (4.9)  |
| <b>Patient demographic and baseline characteristics</b> |                                     |                        |        |                        |        |
| Age (years)                                             | Mean (SD)                           | 76.1 (13.8)            |        | 76.3 (14.1)            |        |
|                                                         | ≤64                                 | 29,659                 | (16.0) | 34,204                 | (16.0) |
|                                                         | 65–74                               | 37,770                 | (20.4) | 41,091                 | (19.2) |
|                                                         | 75–84                               | 62,820                 | (34.0) | 71,825                 | (33.6) |
|                                                         | ≥85                                 | 54,568                 | (29.5) | 66,724                 | (31.2) |
| Sex                                                     | Male                                | 105,167                | (56.9) | 120,696                | (56.4) |
|                                                         | Female                              | 79,650                 | (43.1) | 93,148                 | (43.6) |
| ADL score (point)                                       | Dependent group (0–59)              | 96,591                 | (52.3) | 113,005                | (52.8) |
|                                                         | Independent group (60–100)          | 85,101                 | (46.0) | 97,296                 | (45.5) |
|                                                         | Unknown                             | 3,125                  | (1.7)  | 3,543                  | (1.7)  |
| Cognitive impairment                                    | Yes                                 | 49,445                 | (26.8) | 60,930                 | (28.5) |
|                                                         | Diagnosis of dementia (ICD-10)      | 26,470                 | (14.3) | 33,014                 | (15.4) |
|                                                         | Prescription of anti-dementia drugs | 15,214                 | (8.2)  | 18,685                 | (8.7)  |
|                                                         | Low degree of independence*         | 30,820                 | (16.7) | 38,575                 | (18.0) |
| Inpatient department                                    | Surgery                             | 36,983                 | (20.0) | 38,799                 | (18.1) |
|                                                         | Internal Medicine                   | 33,955                 | (18.4) | 40,868                 | (19.1) |
|                                                         | Gastroenterology                    | 20,135                 | (10.9) | 26,557                 | (12.4) |
|                                                         | Cardiology                          | 14,845                 | (8.0)  | 19,516                 | (9.1)  |
|                                                         | Orthopedics                         | 14,769                 | (8.0)  | 15,886                 | (7.4)  |
|                                                         | Neurosurgery                        | 10,039                 | (5.4)  | 12,943                 | (6.1)  |
|                                                         | Urology                             | 8,619                  | (4.7)  | 10,501                 | (4.9)  |
|                                                         | Cardiovascular Surgery              | 7,953                  | (4.3)  | 7,405                  | (3.5)  |
|                                                         | Respiratory Medicine                | 7,056                  | (3.8)  | 7,484                  | (3.5)  |
|                                                         | Gastrointestinal Surgery            | 5,427                  | (2.9)  | 4,905                  | (2.3)  |
|                                                         | Emergency Medicine                  | 4,047                  | (2.2)  | 5,245                  | (2.5)  |
|                                                         | Neurology                           | 3,598                  | (1.9)  | 4,648                  | (2.2)  |
|                                                         | Pulmonary Surgery                   | 2,134                  | (1.2)  | 2,297                  | (1.1)  |
| Obstetrics & Gynecology                                 | 2,034                               | (1.1)                  | 2,274  | (1.1)                  |        |
| Otolaryngology                                          | 2,033                               | (1.1)                  | 2,047  | (1.0)                  |        |

| Characteristics                    |                                                  | Sensitivity analysis 1 |        | Sensitivity analysis 2 |        |
|------------------------------------|--------------------------------------------------|------------------------|--------|------------------------|--------|
|                                    |                                                  | N (%)                  |        | N (%)                  |        |
|                                    | Nephrology                                       | 1,728                  | (0.9)  | 1,755                  | (0.8)  |
|                                    | General Medicine                                 | 1,272                  | (0.7)  | 1,574                  | (0.7)  |
|                                    | Hematology                                       | 1,024                  | (0.6)  | 974                    | (0.5)  |
|                                    | Endocrinology, Metabolism & Diabetology          | 859                    | (0.5)  | 1,037                  | (0.5)  |
|                                    | Reconstructive Surgery                           | 905                    | (0.5)  | 958                    | (0.4)  |
|                                    | Ophthalmology                                    | 720                    | (0.4)  | 1,040                  | (0.5)  |
|                                    | Others                                           | 4,093                  | (2.2)  | 4,550                  | (2.1)  |
|                                    | Unknown                                          | 589                    | (0.3)  | 581                    | (0.3)  |
| Comorbidities                      | Circulatory disease                              | 103,602                | (56.1) | 119,306                | (55.8) |
|                                    | Endocrine, nutritional, and metabolic diseases   | 77,200                 | (41.8) | 86,310                 | (40.4) |
|                                    | Gastrointestinal disorders                       | 76,319                 | (41.3) | 88,300                 | (41.3) |
|                                    | Malignant neoplasms                              | 56,282                 | (30.5) | 58,680                 | (27.4) |
|                                    | Others                                           | 51,859                 | (28.1) | 57,420                 | (26.9) |
|                                    | Respiratory disease                              | 47,586                 | (25.7) | 52,118                 | (24.4) |
|                                    | Nervous system disorders                         | 36,193                 | (19.6) | 42,476                 | (19.9) |
|                                    | Genitourinary diseases                           | 32,942                 | (17.8) | 36,993                 | (17.3) |
|                                    | Mental and behavioral disorders                  | 24,824                 | (13.4) | 30,773                 | (14.4) |
|                                    | Musculoskeletal/connective tissue disease        | 22,601                 | (12.2) | 24,732                 | (11.6) |
|                                    | Injury                                           | 20,340                 | (11.0) | 23,901                 | (11.2) |
|                                    | Blood disease                                    | 18,251                 | (9.9)  | 19,041                 | (8.9)  |
|                                    | Infectious disease (excluding parasitic disease) | 16,392                 | (8.9)  | 17,308                 | (8.1)  |
|                                    | Skin/subcutaneous tissue disease                 | 5,688                  | (3.1)  | 5,836                  | (2.7)  |
|                                    | Eye disease                                      | 1,960                  | (1.1)  | 2,445                  | (1.1)  |
| Poisoning                          | 876                                              | (0.5)                  | 1,399  | (0.7)                  |        |
| Ear disease                        | 793                                              | (0.4)                  | 927    | (0.4)                  |        |
| <b>Hospitalization information</b> |                                                  |                        |        |                        |        |
| Type of hospitalization            | Hospitalization for elective surgery             | 52,647                 | (28.5) | 64,141                 | (30.0) |
|                                    | Emergency hospitalization without surgery        | 71,805                 | (38.9) | 88,286                 | (41.3) |
|                                    | Emergency hospitalization with surgery           | 44,391                 | (24.0) | 48,568                 | (22.7) |
|                                    | Unknown                                          | 15,974                 | (8.6)  | 12,849                 | (6.0)  |
| Number of beds                     | 0–199                                            | 8,992                  | (4.9)  | 9,895                  | (4.6)  |
|                                    | 200–499                                          | 101,596                | (55.0) | 117,555                | (55.0) |
|                                    | ≥500                                             | 74,229                 | (40.2) | 86,394                 | (40.4) |

| Characteristics          |                                                | Sensitivity analysis 1 |        | Sensitivity analysis 2 |        |
|--------------------------|------------------------------------------------|------------------------|--------|------------------------|--------|
|                          |                                                | N (%)                  |        | N (%)                  |        |
| <b>Clinical practice</b> |                                                |                        |        |                        |        |
| Prescription of PIM      | Yes                                            | 94,998                 | (51.4) | 69,827                 | (32.7) |
|                          | Antidepressants                                | 371                    | (0.2)  | 254                    | (0.1)  |
|                          | Anticholinergic drugs                          | 194                    | (0.1)  | 137                    | (0.1)  |
|                          | Benzodiazepines                                | 38,988                 | (21.1) | 28,269                 | (13.2) |
|                          | Non-benzodiazepines                            | 12,954                 | (7.0)  | 8,780                  | (4.1)  |
|                          | Corticosteroids                                | 21,746                 | (11.8) | 13,734                 | (6.4)  |
|                          | H1-receptor antagonists                        | 12,388                 | (6.7)  | 6,959                  | (3.3)  |
|                          | H2-receptor antagonists                        | 21,028                 | (11.4) | 15,246                 | (7.1)  |
|                          | Opioids                                        | 35,588                 | (19.3) | 19,253                 | (9.0)  |
| Prescription of PIM      | 1                                              | 5,640                  | (3.1)  | 4,728                  | (2.2)  |
| (number of PIM           | 2                                              | 7,794                  | (4.2)  | 6,064                  | (2.8)  |
| drugs)                   | 3                                              | 7,985                  | (4.3)  | 6,451                  | (3.0)  |
|                          | ≥4                                             | 73,579                 | (39.8) | 52,584                 | (24.6) |
| Prescription of PIM      | 1                                              | 58,500                 | (31.7) | 51,123                 | (23.9) |
| (number of PIM           | 2                                              | 26,719                 | (14.5) | 15,136                 | (7.1)  |
| classes)                 | 3                                              | 8,011                  | (4.3)  | 3,089                  | (1.4)  |
|                          | ≥4                                             | 1,768                  | (1.0)  | 479                    | (0.2)  |
| Surgery                  | Yes                                            | 113,012                | (61.1) | 125,558                | (58.7) |
|                          | Surgery sites:                                 |                        |        |                        |        |
|                          | Skin or subcutaneous tissue                    | 4,477                  | (2.4)  | 4,672                  | (2.2)  |
|                          | Musculoskeletal system, extremities, and trunk | 13,859                 | (7.5)  | 14,564                 | (6.8)  |
|                          | Nervous system and cranial                     | 4,825                  | (2.6)  | 5,695                  | (2.7)  |
|                          | Eyes                                           | 704                    | (0.4)  | 1,060                  | (0.5)  |
|                          | Ear, nose, and throat                          | 1,895                  | (1.0)  | 1,570                  | (0.7)  |
|                          | Face, mouth, and neck                          | 874                    | (0.5)  | 1,192                  | (0.6)  |
|                          | Thoracic                                       | 7,613                  | (4.1)  | 9,017                  | (4.2)  |
|                          | Heart and blood vessels                        | 21,172                 | (11.5) | 21,846                 | (10.2) |
|                          | Abdomen                                        | 51,061                 | (27.6) | 57,020                 | (26.7) |
|                          | Urinary system and adrenal gland               | 6,173                  | (3.3)  | 7,365                  | (3.4)  |
|                          | Genital                                        | 2,964                  | (1.6)  | 3,933                  | (1.8)  |
|                          | Anesthesia type/duration:                      |                        |        |                        |        |
|                          | Surgery + no/local/light general anesthesia    | 49,357                 | (26.7) | 58,743                 | (27.5) |
|                          | Surgery + general anesthesia (<2 hours)        | 27,276                 | (14.8) | 32,179                 | (15.0) |

| Characteristics                         |                                                 |     | Sensitivity analysis 1 |        | Sensitivity analysis 2 |        |
|-----------------------------------------|-------------------------------------------------|-----|------------------------|--------|------------------------|--------|
|                                         |                                                 |     | N (%)                  |        | N (%)                  |        |
|                                         | Surgery + general anaesthesia ( $\geq 2$ hours) |     | 36,379                 | (19.7) | 34,636                 | (16.2) |
| Duration of hospitalization             | Mean (SD), days                                 |     | 19.5 (18.9)            |        | 14.9 (11.7)            |        |
|                                         | $\leq 1$ week                                   |     | 22,368                 | (12.1) | 44,771                 | (20.9) |
|                                         | $> 1$ week to $\leq 2$ weeks                    |     | 60,821                 | (32.9) | 81,671                 | (38.2) |
|                                         | $> 2$ weeks to $\leq 3$ weeks                   |     | 48,981                 | (26.5) | 50,271                 | (23.5) |
|                                         | $> 3$ weeks to $\leq 4$ weeks                   |     | 26,094                 | (14.1) | 22,322                 | (10.4) |
|                                         | $> 4$ weeks to $\leq 12$ weeks                  |     | 24,247                 | (13.1) | 14,092                 | (6.6)  |
|                                         | $> 12$ weeks                                    |     | 2,306                  | (1.2)  | 717                    | (0.3)  |
| Use of ICU                              | Yes                                             |     | 42,565                 | (23.0) | 47,127                 | (22.0) |
| Duration, days                          | Mean (SD)                                       |     | 3.8 (3.7)              |        | 3.3 (3.0)              |        |
|                                         | 1 day                                           |     | 14,765                 | (8.0)  | 17,264                 | (8.1)  |
|                                         | 2 days                                          |     | 7,146                  | (3.9)  | 8,810                  | (4.1)  |
|                                         | 3 days                                          |     | 5,101                  | (2.8)  | 6,174                  | (2.9)  |
|                                         | 4 days                                          |     | 3,723                  | (2.0)  | 4,281                  | (2.0)  |
|                                         | 5 days                                          |     | 2,665                  | (1.4)  | 2,913                  | (1.4)  |
|                                         | 6 days                                          |     | 1,970                  | (1.1)  | 2,119                  | (1.0)  |
|                                         | $\geq 7$ days                                   |     | 7,195                  | (3.9)  | 5,566                  | (2.6)  |
| <b>Antipsychotics used for delirium</b> |                                                 |     |                        |        |                        |        |
| Antipsychotic use for delirium          | Yes                                             |     | 176,416                | (95.5) | 203,970                | (95.4) |
| Type of drug formulation                | Haloperidol                                     | INJ | 107,433                | (58.1) | 128,456                | (60.1) |
|                                         |                                                 | TAB | 3,030                  | (1.6)  | 2,861                  | (1.3)  |
|                                         |                                                 | FGR | 311                    | (0.2)  | 308                    | (0.1)  |
|                                         |                                                 | SOL | 26                     | (0.0)  | 22                     | (0.0)  |
|                                         | Risperidone                                     | SOL | 45,913                 | (24.8) | 50,360                 | (23.5) |
|                                         |                                                 | ODT | 10,987                 | (5.9)  | 11,442                 | (5.4)  |
|                                         |                                                 | TAB | 7,314                  | (4.0)  | 7,493                  | (3.5)  |
|                                         |                                                 | FGR | 445                    | (0.2)  | 415                    | (0.2)  |
|                                         |                                                 | INJ | 9                      | (0.0)  | 7                      | (0.0)  |
|                                         | Quetiapine                                      | TAB | 28,040                 | (15.2) | 30,390                 | (14.2) |
|                                         |                                                 | FGR | 1,126                  | (0.6)  | 1,006                  | (0.5)  |
|                                         |                                                 | SRT | 26                     | (0.0)  | 34                     | (0.0)  |
|                                         | Olanzapine                                      | TAB | 4,055                  | (2.2)  | 3,569                  | (1.7)  |
|                                         |                                                 | ODT | 1,678                  | (0.9)  | 1,569                  | (0.7)  |
|                                         |                                                 | FGR | 270                    | (0.1)  | 248                    | (0.1)  |
|                                         |                                                 | INJ | 27                     | (0.0)  | 16                     | (0.0)  |
|                                         | Perospirone                                     | TAB | 3,280                  | (1.8)  | 3,334                  | (1.6)  |

| Characteristics                           |                                                                                       | Sensitivity analysis 1 | Sensitivity analysis 2 |                |
|-------------------------------------------|---------------------------------------------------------------------------------------|------------------------|------------------------|----------------|
|                                           |                                                                                       | N (%)                  | N (%)                  |                |
| Duration of prescription, days            | Mean (SD)                                                                             | 5.7 (10.1)             | 5.3 (7.9)              |                |
| <b>Patient outcomes</b>                   |                                                                                       |                        |                        |                |
| Transfer to other hospitals/nursing homes | Yes                                                                                   | 43,028                 | (23.3)                 | 47,980 (22.4)  |
|                                           | Transfer to other hospitals or clinics                                                | 29,407                 | (15.9)                 | 32,083 (15.0)  |
|                                           | Admission to long-term care health facilities                                         | 3,146                  | (1.7)                  | 3,614 (1.7)    |
|                                           | Admission to facilities covered by public aid providing long-term care to the elderly | 3,909                  | (2.1)                  | 4,485 (2.1)    |
|                                           | Admission to social welfare facilities or fee-based homes for the elderly, etc.       | 6,555                  | (3.5)                  | 7,783 (3.6)    |
|                                           | Nursing home                                                                          | 11                     | (0.0)                  | 15 (0.0)       |
| Death                                     | Yes                                                                                   | 25,377                 | (13.7)                 | 21,567 (10.1)  |
|                                           | No                                                                                    | 159,397                | (86.2)                 | 192,239 (89.9) |

\*Low degree of independence in daily life for the elderly with dementia

ADL, activities of daily living; FGR, fine granule; ICD-10, International Classification of Diseases, 10th revision; ICU, intensive care unit; INJ, injectable; ODT, orally disintegrating tablet; PIM, potentially inappropriate medication; SD, standard deviation; SOL, solution; SRT, sustained-release tablet; TAB, tablet.



Supplemental Figure 1 Patient selection flowchart for the sensitivity analysis.

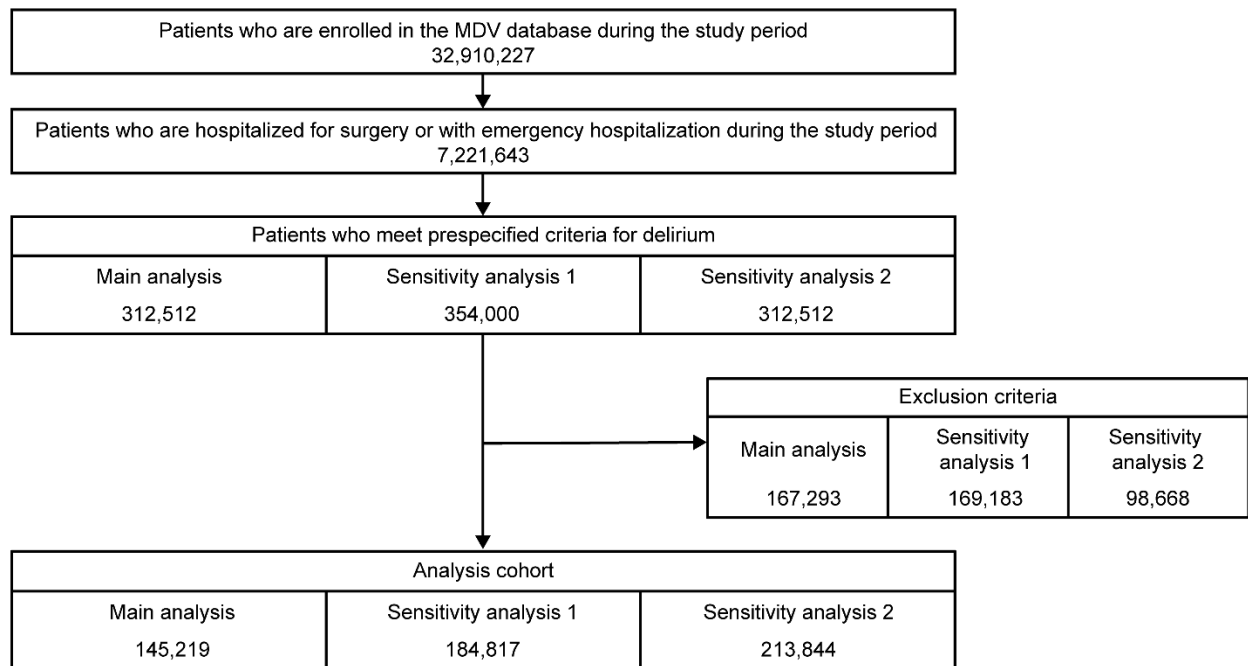

MDV, Medical Data Vision.

**STROBE 2007 (v4) Statement—Checklist of items that should be included in reports of *cross-sectional studies***

| Section/Topic                | Item # | Recommendation                                                                                                                                                                       | Reported on page # |
|------------------------------|--------|--------------------------------------------------------------------------------------------------------------------------------------------------------------------------------------|--------------------|
| <b>Title and abstract</b>    | 1      | (a) Indicate the study's design with a commonly used term in the title or the abstract                                                                                               | 3                  |
|                              |        | (b) Provide in the abstract an informative and balanced summary of what was done and what was found                                                                                  | 3                  |
| <b>Introduction</b>          |        |                                                                                                                                                                                      |                    |
| Background/rationale         | 2      | Explain the scientific background and rationale for the investigation being reported                                                                                                 | 6                  |
| Objectives                   | 3      | State specific objectives, including any prespecified hypotheses                                                                                                                     | 6                  |
| <b>Methods</b>               |        |                                                                                                                                                                                      |                    |
| Study design                 | 4      | Present key elements of study design early in the paper                                                                                                                              | 7                  |
| Setting                      | 5      | Describe the setting, locations, and relevant dates, including periods of recruitment, exposure, follow-up, and data collection                                                      | 7                  |
| Participants                 | 6      | (a) Give the eligibility criteria, and the sources and methods of selection of participants                                                                                          | 7                  |
| Variables                    | 7      | Clearly define all outcomes, exposures, predictors, potential confounders, and effect modifiers. Give diagnostic criteria, if applicable                                             | 8                  |
| Data sources/<br>measurement | 8*     | For each variable of interest, give sources of data and details of methods of assessment (measurement). Describe comparability of assessment methods if there is more than one group | 8                  |
| Bias                         | 9      | Describe any efforts to address potential sources of bias                                                                                                                            | 8                  |
| Study size                   | 10     | Explain how the study size was arrived at                                                                                                                                            | 8                  |
| Quantitative variables       | 11     | Explain how quantitative variables were handled in the analyses. If applicable, describe which groupings were chosen and why                                                         | 8                  |
| Statistical methods          | 12     | (a) Describe all statistical methods, including those used to control for confounding                                                                                                | 7 and 8            |
|                              |        | (b) Describe any methods used to examine subgroups and interactions                                                                                                                  | NA                 |
|                              |        | (c) Explain how missing data were addressed                                                                                                                                          | NA                 |
|                              |        | (d) If applicable, describe analytical methods taking account of sampling strategy                                                                                                   | NA                 |
|                              |        | (e) Describe any sensitivity analyses                                                                                                                                                | 8                  |
| <b>Results</b>               |        |                                                                                                                                                                                      |                    |

|                          |     |                                                                                                                                                                                                              |           |
|--------------------------|-----|--------------------------------------------------------------------------------------------------------------------------------------------------------------------------------------------------------------|-----------|
| Participants             | 13* | (a) Report numbers of individuals at each stage of study—eg numbers potentially eligible, examined for eligibility, confirmed eligible, included in the study, completing follow-up, and analysed            | 9         |
|                          |     | (b) Give reasons for non-participation at each stage                                                                                                                                                         | 9         |
|                          |     | (c) Consider use of a flow diagram                                                                                                                                                                           | Figure 1  |
| Descriptive data         | 14* | (a) Give characteristics of study participants (eg demographic, clinical, social) and information on exposures and potential confounders                                                                     | 9         |
|                          |     | (b) Indicate number of participants with missing data for each variable of interest                                                                                                                          | NA        |
| Outcome data             | 15* | Report numbers of outcome events or summary measures                                                                                                                                                         | 9 and 10  |
| Main results             | 16  | (a) Give unadjusted estimates and, if applicable, confounder-adjusted estimates and their precision (eg, 95% confidence interval). Make clear which confounders were adjusted for and why they were included | NA        |
|                          |     | (b) Report category boundaries when continuous variables were categorized                                                                                                                                    | 15 to 18  |
|                          |     | (c) If relevant, consider translating estimates of relative risk into absolute risk for a meaningful time period                                                                                             | NA        |
| Other analyses           | 17  | Report other analyses done—eg analyses of subgroups and interactions, and sensitivity analyses                                                                                                               | 10        |
| <b>Discussion</b>        |     |                                                                                                                                                                                                              |           |
| Key results              | 18  | Summarise key results with reference to study objectives                                                                                                                                                     | 11        |
| Limitations              | 19  | Discuss limitations of the study, taking into account sources of potential bias or imprecision. Discuss both direction and magnitude of any potential bias                                                   | 12 and 13 |
| Interpretation           | 20  | Give a cautious overall interpretation of results considering objectives, limitations, multiplicity of analyses, results from similar studies, and other relevant evidence                                   | 11 and 12 |
| Generalisability         | 21  | Discuss the generalisability (external validity) of the study results                                                                                                                                        | 12 and 13 |
| <b>Other information</b> |     |                                                                                                                                                                                                              |           |
| Funding                  | 22  | Give the source of funding and the role of the funders for the present study and, if applicable, for the original study on which the present article is based                                                | 14        |

\*Give information separately for cases and controls in case-control studies and, if applicable, for exposed and unexposed groups in cohort and cross-sectional studies.

**Note:** An Explanation and Elaboration article discusses each checklist item and gives methodological background and published examples of transparent reporting. The STROBE checklist is best used in conjunction with this article (freely available on the Web sites of PLoS Medicine at <http://www.plosmedicine.org/>, Annals of Internal Medicine at <http://www.annals.org/>, and Epidemiology at <http://www.epidem.com/>). Information on the STROBE Initiative is available at [www.strobe-statement.org](http://www.strobe-statement.org).

# BMJ Open

## Demographic and clinical characteristics of patients with delirium: analysis of a nationwide Japanese medical database

|                                 |                                                                                                                                                                                                                                                                                                                                                   |
|---------------------------------|---------------------------------------------------------------------------------------------------------------------------------------------------------------------------------------------------------------------------------------------------------------------------------------------------------------------------------------------------|
| Journal:                        | <i>BMJ Open</i>                                                                                                                                                                                                                                                                                                                                   |
| Manuscript ID                   | bmjopen-2021-060630.R1                                                                                                                                                                                                                                                                                                                            |
| Article Type:                   | Original research                                                                                                                                                                                                                                                                                                                                 |
| Date Submitted by the Author:   | 17-Jun-2022                                                                                                                                                                                                                                                                                                                                       |
| Complete List of Authors:       | Ueda, Naoya; MSD KK<br>Igarashi, Masakazu; MSD KK<br>Okuyama, Kotoba; MSD KK<br>Sano, Hideki; MSD KK<br>Takahashi, Kanae; MSD KK<br>P. Qureshi, Zaina; Merck & Co Inc<br>Tokita, Shigeru; MSD KK<br>Ogawa, Asao; National Cancer Center Japan<br>Okumura, Yasuyuki; Ippan Shadan Hojin Rinsho Ekigaku Kenkyu Suishin Kiko<br>Okuda, Shoki; MSD KK |
| <b>Primary Subject Heading</b>: | Neurology                                                                                                                                                                                                                                                                                                                                         |
| Secondary Subject Heading:      | Epidemiology                                                                                                                                                                                                                                                                                                                                      |
| Keywords:                       | Delirium & cognitive disorders < PSYCHIATRY, PSYCHIATRY, EPIDEMIOLOGY                                                                                                                                                                                                                                                                             |
|                                 |                                                                                                                                                                                                                                                                                                                                                   |

SCHOLARONE™  
Manuscripts

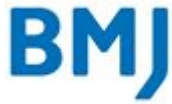

I, the Submitting Author has the right to grant and does grant on behalf of all authors of the Work (as defined in the below author licence), an exclusive licence and/or a non-exclusive licence for contributions from authors who are: i) UK Crown employees; ii) where BMJ has agreed a CC-BY licence shall apply, and/or iii) in accordance with the terms applicable for US Federal Government officers or employees acting as part of their official duties; on a worldwide, perpetual, irrevocable, royalty-free basis to BMJ Publishing Group Ltd ("BMJ") its licensees and where the relevant Journal is co-owned by BMJ to the co-owners of the Journal, to publish the Work in this journal and any other BMJ products and to exploit all rights, as set out in our [licence](#).

The Submitting Author accepts and understands that any supply made under these terms is made by BMJ to the Submitting Author unless you are acting as an employee on behalf of your employer or a postgraduate student of an affiliated institution which is paying any applicable article publishing charge ("APC") for Open Access articles. Where the Submitting Author wishes to make the Work available on an Open Access basis (and intends to pay the relevant APC), the terms of reuse of such Open Access shall be governed by a Creative Commons licence – details of these licences and which [Creative Commons](#) licence will apply to this Work are set out in our licence referred to above.

Other than as permitted in any relevant BMJ Author's Self Archiving Policies, I confirm this Work has not been accepted for publication elsewhere, is not being considered for publication elsewhere and does not duplicate material already published. I confirm all authors consent to publication of this Work and authorise the granting of this licence.

**Title:**

Demographic and clinical characteristics of patients with delirium: analysis of a nationwide Japanese medical database

**Authors:**

Naoya Ueda<sup>1</sup>, Masakazu Igarashi<sup>1</sup>, Kotoba Okuyama<sup>1</sup>, Hideki Sano<sup>1</sup>, Kanae Takahashi<sup>2</sup>, Zaina P. Qureshi<sup>3</sup>, Shigeru Tokita<sup>1</sup>, Asao Ogawa<sup>4</sup>, Yasuyuki Okumura<sup>5</sup>, Shoki Okuda<sup>1</sup>

**Affiliations:**

<sup>1</sup>Medical Affairs, MSD K.K., Tokyo, Japan

<sup>2</sup>Japan Development, MSD K.K., Tokyo, Japan

<sup>3</sup>Center for Observational and Real-world Evidence (CORE), Merck & Co., Inc., Kenilworth, NJ, USA

<sup>4</sup>Division of Psycho-Oncology, Exploratory Oncology Research and Clinical Trial Center, National Cancer Center, Chiba, Japan

<sup>5</sup>Initiative for Clinical Epidemiological Research, Tokyo, Japan

**Corresponding author:**

Shoki Okuda, PhD

Address: MSD K.K., Kitanomaru Square, 1-13-12 Kudan-kita, Chiyoda-ku

Tokyo 102-8667, Japan

Email: shoki.okuda@merck.com

Telephone: +81-3-6272-0136

1  
2  
3  
4  
5  
6  
7  
8  
9  
10  
11  
12  
13  
14  
15  
16  
17  
18  
19  
20  
21  
22  
23  
24  
25  
26  
27  
28  
29  
30  
31  
32  
33  
34  
35  
36  
37  
38  
39  
40  
41  
42  
43  
44  
45  
46  
47  
48  
49  
50  
51  
52  
53  
54  
55  
56  
57  
58  
59  
60

**Word count**

**Abstract** - 297 words (word count limit: 300)

**Main text** - 3,872 words (word count limit: 4,000)

**Numbers:**

Tables - 4

Figures - 1

References - 49

For peer review only

## ABSTRACT

**Objectives:** Delirium commonly occurs during hospitalization and is associated with increased mortality, especially in elderly patients. This study aimed to determine the demographic and clinical characteristics of patients with delirium in the Japanese real-world clinical setting using a nationwide database comprising claims and discharge abstract data.

**Design:** This was an observational, cross-sectional, retrospective study in hospitalized patients with an incident delirium identified by a diagnosis based on International Classification of Diseases, 10th revision codes or initiating antipsychotics recommended for delirium treatment in Japan during their hospitalization.

**Setting:** Patients from the Medical Data Vision database including more than 400 acute care hospitals in Japan were evaluated from admission to discharge.

**Participants:** Of the 32,910,227 patients who were included in the database between April 2012 and September 2020, 145,219 patients met the criteria for delirium.

**Primary and secondary outcome measures:** Demographic and baseline characteristics, comorbidities, clinical profiles, and pharmacological treatments were evaluated in patients with delirium.

**Results:** The mean (standard deviation [SD]) patient age was 76.5 (13.8) years. More than half of the patients (n=82,159; 56.6%) were male. The most frequent comorbidities were circulatory system diseases, observed in 81,954 (56.4%) patients. Potentially inappropriate medications (PIMs) with risk of delirium including benzodiazepines and opioids were prescribed to 76,798 (52.9%) patients. Approximately three-fourths of these patients (56,949; 74.2%) were prescribed  $\geq 4$  PIMs. The most prescribed treatment for delirium was injectable haloperidol (n=82,490; 56.8%). Mean (SD) length of hospitalization was 16.0 (12.1) days.

**Conclusions:** The study results provide comprehensive details of the clinical characteristics of patients with delirium and treatment patterns with antipsychotics in the Japanese acute care setting. In this patient population, the prescription rate of injectable haloperidol and PIMs was high, suggesting the need for improved understanding among healthcare providers about the appropriate management of delirium, which may benefit patients.



**ARTICLE SUMMARY - Strengths and limitations of this study**

- This was the first nationwide study that comprehensively assessed the clinical characteristics of patients with delirium in the real-world setting of acute care hospitals in Japan.
- Analysis of the nationwide claims and discharge abstract database, using an algorithm adapted to the Japanese clinical setting, enabled identification of a large sample of patients with delirium in acute care hospitals in Japan.
- As data were identified from the Medical Data Vision database, which is designed to capture claims and discharge abstracts in Japan and is not for research use, misclassification of the International Classification of Diseases, 10th revision codes may occur, given that no quality check is performed.

**KEYWORDS:** Acute care hospitals, Antipsychotics, Delirium, Medical record database, Real-world evidence

## INTRODUCTION

Delirium is an acute condition characterized by fluctuating disturbances in attention, awareness, and cognition.[1] It frequently occurs in hospitalized elderly patients in an acute care setting, especially those in intensive care units (ICUs), and in postoperative care settings.[2,3] The prevalence of delirium is reported as 10%–31% among hospitalized patients within 24 hours of admission.[4] Among elderly patients, the prevalence is reported as 15%–53% after surgery [5,6] and 80% in those admitted to the ICU.[5] Previous studies have shown that delirium is associated with prolonged hospital stay and institutionalization [2,7] and increased mortality in nonsurgical and surgical patients in general wards, emergency departments, and ICUs.[7,8] Furthermore, long-term cognitive and functional decline is associated with delirium, often lasting up to a year following hospital discharge.[7,9] Consequently, delirium increases economic burden by raising healthcare expenditure and imposing costs related to loss of well-being.[3]

Despite its high prevalence and poor prognosis, delirium remains unrecognized in a substantial proportion of old patients. In a prospective clinical epidemiological study, even nursing personnel was unable to recognize delirium in up to two-thirds of the hospitalized elderly patients.[10] Recent evidence suggests that antipsychotics and multicomponent interventions can notably reduce the incidence of delirium and improve clinical outcomes,[11-13] emphasizing the need for early intervention and prevention in the hospitalized or postoperative elderly population that is at risk of delirium.[14]

Antipsychotics are widely used for the treatment of delirium, although no standard clinical pathway for the management of delirium has been established. The Japanese Ministry of Health, Labour and Welfare (MHLW) issued a notification in 2011, permitting the reimbursement of off-label oral and injectable haloperidol, oral perospirone, quetiapine, and risperidone for the treatment of delirium, psychomotor agitation, and irritability associated with organic diseases.[15] In addition, the Japanese Society of General Hospital Psychiatry recommended the use of several antipsychotics in a pharmacotherapy algorithm for delirium.[16] However, few studies have quantitatively investigated the use of antipsychotics for the treatment of patients with delirium in real-world clinical practice in Japan.[17,18]

A limited number of studies have examined the characteristics of patients experiencing delirium based on a medical database.[17-25] This is because identification of delirium through a medical database is quite challenging, given the inconsistent and poor documentation of records.[26] Moreover, the identification of delirium requires bedside cognitive assessments and application of validated diagnostic tools such as the Confusion Assessment Method (CAM) [27] or the Diagnostic and Statistical Manual of Mental Disorders criteria.[1] Therefore, delirium is not routinely evaluated in acute care hospitals,[26,28] and the information on delirium diagnosis rarely gets recorded in healthcare utilization databases (e.g., claims data or hospital clinical data repository).

Although several medical database studies in the USA [19] and Japan [24] have used International Classification of Diseases, 9th revision (ICD-9) or ICD, 10th revision (ICD-10) codes to identify patients with a diagnosis of delirium, only around 2% of patients with

1  
2  
3 delirium (postoperative in Japan) could be identified. On the other hand, several medical  
4 database studies have employed antipsychotic use to identify patients with  
5 delirium.[21,23,25] However, either of these criteria, when used exclusively, may be  
6 inadequate in obtaining a comprehensive and true picture of delirium patients in the real-  
7 world clinical setting in Japan.  
8  
9

10 To date, few studies have investigated the overall profile of patients with delirium in the real-  
11 world clinical setting in Japan. The present study aimed to assess the demographic  
12 characteristics, comorbidities, clinical profiles, and treatments in patients with delirium  
13 during hospitalization from a nationwide administrative database of acute care hospitals in  
14 Japan, the Medical Data Vision (MDV) database. In this study, delirium was defined using  
15 the algorithms that were recommended in the recently published claims-based database  
16 studies with slight modifications.[22,24]  
17  
18  
19  
20  
21  
22  
23  
24  
25  
26  
27  
28  
29  
30  
31  
32  
33  
34  
35  
36  
37  
38  
39  
40  
41  
42  
43  
44  
45  
46  
47  
48  
49  
50  
51  
52  
53  
54  
55  
56  
57  
58  
59  
60

## METHODS

### Study design

This was a retrospective, cross-sectional, observational study using a nationwide administrative database (MDV Co., Ltd., Tokyo, Japan), with data collected from April 1, 2012, to September 30, 2020. The MDV database contains anonymized administrative data of more than 30 million patients from over 400 hospitals, which cover approximately 24% of all acute care hospitals in Japan. The MDV database includes claims data and discharge abstract data collected from inpatient and outpatient visits.

### Study ethics

This study utilized de-identified data from the MDV database and ethics approval was not required, in line with the Ethical Guidelines for Epidemiological Research from the MHLW, Japan. Therefore, no ethics or institution review board approval was obtained.

### Patient selection

In this study, patients admitted to general wards and ICUs were included. Patients meeting the prespecified delirium identification algorithm criteria who were hospitalized for surgery or an emergency and those who were discharged, transferred to other hospitals, or died after hospitalization during the study period were included in the analyzed data set.

The delirium identification algorithm in this study was based on that recently reported by Kim et al.[22] Kim et al. proposed an algorithm that defines delirium based on ICD diagnosis codes or antipsychotic use and has a modestly better profile (30% sensitivity; 97% specificity) than existing algorithms such as either ICD diagnosis codes alone or antipsychotic use alone. In this study, patients were identified and included as the study participants based on the following criteria: a confirmed diagnosis of delirium during hospitalization, coded as F05 per ICD-10 (criterion 1) or prescription of at least one antipsychotic agent (haloperidol, olanzapine, perospirone, quetiapine, or risperidone) between the index date (admission date) and the next 7 days (criterion 2). The algorithm was modified to adjust with the clinical setting in Japan. Patients with a minimum stay of 3 days, including at least 2 antipsychotic-free days, were included in the study.[23] This “two-day washout” period after hospitalization allowed the exclusion of patients who already had a prescription of the selected antipsychotic because of pre-existing conditions. Patients who were hospitalized for less than 3 days; who had schizophrenia spectrum disorder (F20-29 codes per ICD-10), bipolar disorder (F30-31 codes per ICD-10), or delirium (F05 code per ICD-10) as “admission-precipitating diagnosis” or “comorbidities present on admission”; who were prescribed antipsychotics on the hospitalization date or the next day; and who were prescribed olanzapine in combination with cisplatin for nausea within 1 week from the index date were excluded from the analyses.

Patients hospitalized multiple times were evaluated only at the first hospitalization when the inclusion criteria were met. Repeated episodes of delirium in the same patient were not tracked or included in the analysis. The observation period was from the index date (date of hospitalization) to the end of hospitalization, defined as discharge, hospital transfer, or death of the patient.

## Outcomes

The following demographic and baseline characteristics, clinical profiles, and comorbidities of patients with delirium were assessed from the MDV database: patients' baseline characteristics (sex, age, activities of daily living score calculated using the Barthel Index [29] cognitive impairment [assessed as "present" if the patient was previously diagnosed with dementia or prescribed anti-dementia medications or had a low degree of independence]), inpatient departments, comorbidities, type of clinical practice (delirium-associated PIM use [identified based on the Beers Criteria,[30] the Guidelines for medical treatment and its safety in the elderly from the Japan Geriatrics Society Working Group,[31] and the report from Noshiro et al.,[32]) type of surgery [sites or duration of anesthesia], duration of hospitalization and ICU stay), hospitalization information (type of hospitalization [surgery or emergency hospitalization], number of beds), prescription pattern for each antipsychotic, and patient outcomes (transfer to other hospitals/nursing homes, death). Among the outcomes, age, ADL, cognitive impairment, and comorbidities were assessed as the risk (predisposing) factors of delirium. Surgery information, hospitalization information (surgery or emergency), and PIM use were assessed as triggers (precipitating factors) of delirium.[8]

## Statistical analysis

The aim of this study was descriptive; therefore, no sample size calculations were performed. Data were summarized as mean (standard deviation [SD]) or number and frequency (%). All statistical analyses were performed using SAS ver. 9.4 (SAS Institute Inc., Cary, NC, USA).

## Sensitivity analysis

As many assumptions were made while creating the delirium identification algorithm, two sensitivity analyses were conducted for patients selected in the main analyses to confirm how different assumptions on the analyzed populations might have influenced the outcomes. As some patients could have undergone surgery several days after their admission and the criteria used to identify patients to be included in the main analysis do not allow their inclusion, patients who had a prescription of any of the "selected" antipsychotics between the 3rd day of hospitalization and the day of discharge (or transfer or death) were included in the sensitivity analysis 1 (SA1). Furthermore, as some patients may undergo surgery immediately after the emergency admission and have delirium on the next day and the criteria set for the main analysis do not allow their inclusion, patients who had a prescription of the specified antipsychotics between the 2nd and 8th day of hospitalization were included in the sensitivity analysis 2 (SA2).

## Patient and public involvement

Patients were not involved in any phase of this retrospective study, and data were collected from de-identified administrative claims database.

## RESULTS

### Identification of patients with delirium

Of the 32,910,227 patients who were included in the MDV database during the study period, 145,219 were identified as having delirium (Figure 1). Among patients who were hospitalized for surgery or an emergency (n=7,221,643), 2.0% were identified as having delirium. Overall, 9,898 (6.8%) patients who met the delirium identification algorithm criteria were diagnosed with delirium based on ICD-10 codes and did not receive any of the selected antipsychotic treatments during their hospitalization; 128,095 (88.2%) patients were identified because they had been prescribed any of the selected antipsychotics, and 7,226 (5.0%) patients who met the delirium identification algorithm criteria had both a diagnosis of delirium and an antipsychotic prescription (Figure 1). Most (n=14,801; 86.4%) of the 17,124 patients with an ICD-10 coded diagnosis had “delirium” (code F05.9), followed by “nocturnal delirium” (code F05.9), “delirium superimposed on dementia” (code F05.1), and “delirium not superimposed on dementia” (code F05.0; Supplemental Table 1).

### Patient demographics and baseline characteristics

Mean (SD) patient age was 76.5 (13.8) years, and approximately 65% of patients were  $\geq 75$  years of age; more than 50% (n=82,159) of patients were male. Approximately half (n=76,422; 52.6%) of the patients with delirium were categorized as “dependent (need someone’s help)” based on the Barthel Index score (Table 1). Cognitive impairment was noted in 40,376 (27.8%) patients (Table 1; Supplemental Table 2). Circulatory system diseases were the most common comorbidity, observed in 81,954 (56.4%) patients, followed by endocrine, nutritional, and metabolic diseases (n=59,955; 41.3%) and digestive system diseases (n=59,691; 41.1%; Table 1; Supplemental Table 3). These outcomes were assessed as the risk (predisposing) factors of delirium.

### Clinical practice

Around half (n=85,492; 58.9%) of the patients with delirium underwent any surgery, of whom approximately one-third (n=28,557) were anesthetized for more than 2 hours (Table 2). There was a wide distribution of surgical sites, with the abdomen being the most common site (n=38,898; 26.8%; Supplemental Table 4). Mean (SD) duration of hospitalization was 16.0 (12.1) days; 55,709 (38.4%) patients were hospitalized for 1–2 weeks (Table 2). Overall, 33,718 (23.2%) patients were admitted to the ICU for a mean (SD) of 3.4 (3.1) days, of whom 4,379 (3.0%) spent at least 7 days in the ICU (Table 2). PIMs were prescribed to 76,798 (52.9%) patients, including benzodiazepines in 31,324 (21.6%) patients and opioids in 29,268 (20.2%) patients. Approximately three-fourths (n=56,949; 74.2%) of these patients were prescribed  $\geq 4$  PIMs. Multiple classes of PIMs were used by 38.6% of patients to whom PIMs were prescribed (Table 2). These factors were assessed as triggers (precipitating factors) of delirium.

### Treatment for delirium

Injectable haloperidol was the most prescribed antipsychotic (n=82,490; 56.8%) for the treatment of delirium, followed by risperidone solution (n=34,282; 23.6%), quetiapine tablet (n=19,830; 13.7%), risperidone orodispersible tablet (n=7,645; 5.3%), and risperidone tablet (n=4,958; 3.4%; Table 3). The mean (SD) duration of these antipsychotic prescriptions was 5.4 (8.1) days (Table 3).

## Hospitalizations and patient outcome

Assessment of patients with delirium by hospital department showed that the departments where at least 5% of patients experienced delirium were surgery (n=28,656; 19.7%), internal medicine (n=28,232; 19.4%), gastroenterology (n=15,445; 10.6%), cardiology (n=12,337; 8.5%), orthopedics (n=11,302; 7.8%), and neurosurgery (n=8,144; 5.6%; Table 1; Supplemental Table 4). In general, 52,766 (36.3%) patients with delirium were hospitalized for planned elective surgery, whereas 59,727 (41.1%) patients were hospitalized due to an emergency (without subsequent surgery) and 32,726 (22.5%) patients were hospitalized due to an emergency and underwent surgery (Supplemental Table 4). A total of 15,556 (10.7%) patients died while in hospital, and 22,081 (15.2%) were transferred to other hospitals or clinics (Table 4).

## Sensitivity analysis

The results of the sensitivity analyses identified 184,817 patients with delirium in SA1 and 213,844 in SA2 (Supplemental Figure 1). Patients' mean (SD) age was 76.1 (13.8) years in SA1 and 76.3 (14.1) years in SA2. A total of 96,591 (52.3%) patients in SA1 and 113,005 (52.8%) patients in SA2 were classified as dependent (Supplemental Table 5).

The proportion of patients prescribed one or more antipsychotics to treat their delirium was 95.5% in SA1 and 95.4% in SA2. The proportion of injectable haloperidol prescriptions was 58.1% in SA1 and 60.1% in SA2, while the proportion of prescriptions for risperidone solution was 24.8% in SA1 and 23.5% in SA2 and that for risperidone tablets was 4.0% in SA1 and 3.5% in SA2 (Supplemental Table 5).

## DISCUSSION

The present study was the first nationwide database study that assessed the clinical characteristics of patients with delirium in acute care hospitals in Japan. To identify patients with delirium from the hospital database, the study used the delirium identification algorithm which consists of diagnoses based on ICD-10 codes and prescriptions of antipsychotics frequently used in the treatment of delirium.[22] The prevalence of delirium obtained in our study was 2.0% among patients who were hospitalized for surgery or an emergency, which was lower than the incidence of new delirium per admission (3%–29%) reported in a systematic review of the literature.[4] The low prevalence of delirium might be due to the sensitivity of the algorithm used in our study. A potential explanation is that physicians are not aware of delirium, thereby leading to its inappropriate management. Another possible explanation is that physicians do not proactively record a diagnosis of delirium in claims because there is no approved drug for delirium treatment or prevention in Japan, except for tiapride that is approved for the management of delirium after stroke.

In our study, about half of the patients (n=85,492; 58.9%) underwent surgery during their hospital stay, and delirium was also identified among nonsurgical patients in general medical wards such as internal medicine, gastroenterology, and cardiology. A systematic literature review reported the prevalence of delirium among patients admitted to general medical and geriatric wards as 18%–35%.[8] Our findings revealed the occurrence of delirium in broad clinical departments in Japanese acute care hospitals, suggesting the need for physicians and nurses in these departments to understand the diagnosis and management of patients with delirium.

Drug classes such as benzodiazepines, opioids, and H2 blockers were selected as PIMs, which are reported to be associated with the onset of delirium in guidelines [30,31] and several studies.[32–36] In our study, more than half (52.9%) of the patients were prescribed a PIM of any type; approximately one-fifth of patients were prescribed either benzodiazepines or opioids (21.6% and 20.2%, respectively). Benzodiazepines and opioids are associated with an increased risk of delirium in medical and surgical patients.[34] In a single center study in Canada, the risk was more than doubled within 28 days of hospitalization in patients with cancer who were receiving benzodiazepines (>2 mg/day) and opioids (>90 mg/day).[37] It should be noted that Japan is one of the countries with a high rate of consumption of benzodiazepine-type sedative hypnotics.[38] In addition, opioids are necessary to control severe pain, and pain is also known to be associated with a risk of delirium.[16] suggesting the importance of delirium control in combination with pain control. PIMs also include several drugs with anticholinergic activities, such as antihistamines and antidepressants.[30] Use of anticholinergic drugs is associated with an increased risk of delirium.[39,40] Thus, physicians should avoid unnecessarily prescribing drugs with anticholinergic effects considering the risk of delirium onset. Furthermore, at least 4 PIMs were prescribed in 74.2% of patients with delirium in the present study. Polypharmacy with  $\geq 3$  drugs is reported to increase the risk of delirium by 2.9 times in elderly patients during hospitalization.[41] As drug interactions are a concern regarding PIMs in patients with polypharmacy, potential drug interactions in addition to the number of PIMs used should be carefully considered especially in patients with polypharmacy. The frequent use of PIMs that increase the risk of delirium in the real world, particularly in elderly patients, reaffirms the need for a better understanding of the benefit-risk profile of such medications.

In our study, injectable haloperidol was the most frequently prescribed (56.8%) antipsychotic, followed by risperidone solution (23.6%) and quetiapine tablets (13.7%) in patients with



1  
2  
3 delirium. The outcomes are similar to those from a recent database study in Japan, where  
4 haloperidol infusion was the most frequently used treatment in postoperative patients with  
5 delirium.[17] These results are also consistent with those of a questionnaire-based cross-  
6 sectional study in which more than two-thirds of Japanese experts recommended intravenous  
7 haloperidol as the initial drug (if an intravenous line was placed during hospitalization) and  
8 atypical oral antipsychotics such as risperidone or quetiapine as initial oral drugs for  
9 hyperactive delirium.[42] Risperidone solution and olanzapine orodispersible tablets could be  
10 useful for patients who have difficulties in taking medicines.[16] In our study, a relatively  
11 high proportion of patients were prescribed risperidone solution (23.6%); however, only 0.6%  
12 were prescribed olanzapine orodispersible tablets. The low proportion of olanzapine  
13 prescription could be due to the long half-life of olanzapine and its contraindication in  
14 patients with diabetes in Japan.[16] Overall, our findings suggest that injectable haloperidol is  
15 the major treatment modality for delirium in an acute care setting likely because it can be  
16 used as needed for the treatment of delirium in such a setting. Unlike psychiatrists, the  
17 majority of physicians who treat patients with delirium are likely to be unfamiliar with use of  
18 atypical antipsychotics. However, in a broader clinical context, the risk of death in the elderly  
19 was reported to be 2.26-fold higher with haloperidol versus olanzapine,[43] and the  
20 likelihood of overall survival was 1.73-fold higher with placebo in a randomized control  
21 trial.[44] Moreover, the incidence of adverse events, particularly extrapyramidal symptoms,  
22 is reportedly higher with haloperidol versus risperidone, although their efficacy is reportedly  
23 similar.[45,46] While antipsychotics are frequently used for treating delirium in real-world  
24 clinical settings, physicians should note that nonpharmacological treatment is the first-line  
25 therapy for delirium and that antipsychotic use should be considered only if the  
26 nonpharmacological treatment is ineffective and patients are at risk of injuring themselves  
27 and others. For example, the NICE delirium guidelines state that short-term haloperidol may  
28 be given when an individual with delirium is distressed or considered to be at risk to  
29 themselves or others, and if verbal and nonverbal de-escalation methods have not shown  
30 effect.[47] The Beers Criteria by the American Geriatrics Society recommend that PIMs  
31 including antipsychotics be avoided in older adults at high risk of delirium owing to the risk  
32 of inducing or worsening the condition.[30] Moreover, olanzapine has anticholinergic effects,  
33 and its use in managing delirium is controversial because some case reports have shown that  
34 its use may be associated with delirium onset.[48,49] Therefore, it is important for healthcare  
35 providers to understand the appropriate nonpharmacological management of delirium.

36  
37  
38  
39  
40  
41  
42 The greatest strength of this study is the large size of the MDV database, which enabled the  
43 identification of a large number of patients with delirium. The use of our algorithm optimized  
44 for the Japanese clinical setting led to an increased number of patients being retrieved from  
45 hospital databases, thus highlighting the utility of this algorithm in real-world scenarios.  
46 More importantly, outcomes of the sensitivity analyses, which considered different treatment  
47 time frames in determining index, were consistent with those of the main analysis reinforcing  
48 the robustness of our study results. The prevalence of delirium obtained by identifying  
49 patients using an ICD-coded diagnosis was only 0.2% among patients who were hospitalized  
50 for surgery or an emergency in our study, which is similar to that reported in previous studies  
51 in Japan.[18,24] However, this low prevalence may not be a true reflection of the occurrence  
52 of delirium in the real world, as observed in a prospective study that compared the sensitivity  
53 and specificity of various delirium identification algorithms.[22] According to Sakakibara et  
54 al., delirium is recorded on the claims receipt only for patients with severe delirium requiring  
55 more medical resources, but not for those with mild-to-moderate delirium.[24] Our results  
56 confirm that the majority of Japanese patients with delirium can be identified from a Japanese  
57 claims database based on prescription of an antipsychotic during their hospital stay; 88.2% of  
58  
59  
60

1  
2  
3 patients with delirium were identified based on an antipsychotic prescription. A recent study  
4 employing a Japanese national inpatient database used the daily nursing necessity score  
5 (dangerous behavior or misunderstanding of nursing instructions) as the criterion of delirium,  
6 but reported a prevalence of delirium of approximately 1% (n=21,182) among 2,070,000  
7 postoperative patients.[17] The results of the present study show the feasibility of using  
8 administrative databases for identifying patients with delirium in an acute care hospital  
9 setting in Japan.  
10  
11

12 This study has several limitations. First, the data were extracted from the MDV database,  
13 which is designed primarily for insurance purposes and not for research; therefore, no quality  
14 checks for data are performed and there is a likelihood of misclassification of ICD-10 coding.  
15 Second, as the data of patients transferred to other hospitals were not registered in this  
16 database, patients who were moved to or hospitalized in a different hospital after the index  
17 hospitalization could not be identified. This could have led to multiple hospitalizations of the  
18 same high-risk patients, with multiple episodes of delirium at different times being identified  
19 as separate events and possibly increasing the number of identified cases. Third, the number  
20 of prescribed antipsychotics may be inflated because some patients with psychotic disorders  
21 may have been included from the database during analysis although the present study  
22 excluded patients with schizophrenia or bipolar disease. Lastly, the sensitivity and specificity  
23 of the modified delirium identification algorithm used in this study have not yet been  
24 validated in Japan. The recent addition of a medical fee for the care of high-risk patients with  
25 delirium in the medical reimbursement revision of 2020 in Japan may increase the accuracy  
26 of identification of patients with delirium from the medical database. For future research, the  
27 delirium identification algorithm used in our study needs to be validated.  
28  
29  
30

31 In conclusion, the results of the present study provide comprehensive details of the clinical  
32 characteristics of patients with delirium and treatment patterns with antipsychotics in the  
33 Japanese acute care setting. The results reinforce the need to consider the risk of delirium in  
34 hospitals, especially in high-risk patients, and provide useful information for healthcare  
35 professionals to understand the clinical profile of patients who are likely to experience  
36 delirium when hospitalized. The study reveals two important findings in this patient  
37 population: 1) the high prescription rate of injectable haloperidol and 2) the frequent use of  
38 PIMs in patients with delirium. Thus, there is a need for improved understanding among  
39 healthcare providers about appropriate management of delirium in an acute care setting,  
40 which may benefit patients.  
41  
42  
43  
44  
45  
46  
47  
48  
49  
50  
51  
52  
53  
54  
55  
56  
57  
58  
59  
60

## COMPETING INTERESTS

NU, MI, KO, HS, KT, ST, and SO are employees of MSD K.K., Tokyo, Japan, a subsidiary of Merck & Co., Inc., Kenilworth, NJ, USA and may own stock and/or hold stock options in Merck & Co., Inc., Kenilworth, NJ, USA. ZPQ is an employee of Merck Sharp & Dohme Corp., a subsidiary of Merck & Co., Inc., Kenilworth, NJ, USA and may own stock and/or hold stock options in Merck & Co., Inc., Kenilworth, NJ, USA. AO and YO have received funding from MSD K.K., Tokyo, Japan for research consulting.

## ACKNOWLEDGMENTS

The authors thank Andrea Rossi and Deepali Garg of Cactus Life Sciences (part of Cactus Communications) for medical writing of manuscript and editorial assistance, which was funded by MSD K.K., Tokyo, Japan, and Shinya Miura, Hideaki Ogawa and Shinichiro Suzuki of CMIC Co., Ltd. for medical writing of protocol and data analysis under the guidance and approval of MSD K.K., Tokyo Japan.

## FUNDING

This work was supported by MSD K.K., Tokyo, Japan. The funder of the study was involved in the development of the study design, data analysis, data interpretation, writing of the manuscript, and the decision to submit the manuscript for publication. All authors had full access to the study results.

## AUTHOR CONTRIBUTIONS

SO, HS, KT, ZPQ, ST, AO, and YO conceptualized the study. NU, MI, KO, and SO conducted the study designing and data analysis planning. HS, KT, ZPQ, and ST contributed to the study designing. KT, AO, and YO provided advice on study design and contributed to the interpretation of the findings from the viewpoint of the clinical scientist, the physician and the epidemiologist, respectively. All authors contributed to interpretation of data and approved the final version of the manuscript. NU and SO are guarantors and accept full responsibility for the work.

## DATA SHARING STATEMENT

The Medical Data Vision database analyzed in this study is not publicly accessible, and the data cannot be shared with external researchers according to the contract with Medical Data Vision Co., Ltd.

**Table 1 Patient demographic and baseline characteristics.**

|                                   |                            | Number of patients |        |
|-----------------------------------|----------------------------|--------------------|--------|
|                                   |                            | N (%)              |        |
| Number of patients                |                            | 145,219            |        |
| Age (years)                       | Mean (SD)                  | 76.5 (13.8)        |        |
|                                   | ≤64                        | 22,168             | (15.3) |
|                                   | 65–74                      | 28,371             | (19.5) |
|                                   | 75–84                      | 49,739             | (34.3) |
|                                   | ≥85                        | 44,941             | (30.9) |
| Sex                               | Male                       | 82,159             | (56.6) |
|                                   | Female                     | 63,060             | (43.4) |
| ADL score (point)*                | Dependent group (0–59)     | 76,422             | (52.6) |
|                                   | Independent group (60–100) | 66,381             | (45.7) |
|                                   | Unknown                    | 2,416              | (1.7)  |
| Cognitive impairment <sup>†</sup> | Yes                        | 40,376             | (27.8) |
|                                   | No                         | 104,843            | (72.2) |
| Inpatient department              | Surgery                    | 28,656             | (19.7) |
|                                   | Internal Medicine          | 28,232             | (19.4) |
|                                   | Gastroenterology           | 15,445             | (10.6) |
|                                   | Cardiology                 | 12,337             | (8.5)  |
|                                   | Orthopedics                | 11,302             | (7.8)  |
|                                   | Neurosurgery               | 8,144              | (5.6)  |
|                                   | Urology                    | 7,031              | (4.8)  |
|                                   | Cardiovascular Surgery     | 6,042              | (4.2)  |
|                                   | Respiratory Medicine       | 5,506              | (3.8)  |
|                                   | Gastrointestinal Surgery   | 4,093              | (2.8)  |
|                                   | Emergency Medicine         | 3,414              | (2.4)  |

|                                      |                                                          |        |        |
|--------------------------------------|----------------------------------------------------------|--------|--------|
|                                      | Neurology                                                | 3,008  | (2.1)  |
|                                      | Others                                                   | 11,573 | (8.0)  |
| <hr/>                                |                                                          |        |        |
| Comorbidities                        | Circulatory system diseases (I00-I99)                    | 81,954 | (56.4) |
| (ICD-10 major category) <sup>‡</sup> | Endocrine, nutritional, and metabolic diseases (E00-E90) | 59,955 | (41.3) |
|                                      | Digestive system diseases (K00-K93)                      | 59,691 | (41.1) |
|                                      | Malignant neoplasms (C00-C97)                            | 41,710 | (28.7) |
|                                      | Respiratory system diseases (J00-J99)                    | 36,958 | (25.4) |

\*Barthel Index will be used for evaluation.

<sup>†</sup>Cognitive Impairment was assessed as “present” if the patient was previously diagnosed with dementia or prescribed anti-dementia drugs or had a low degree of independence.

<sup>‡</sup>Top 5 major ICD-10 categories are presented.

ADL, activity of daily living; ICD-10, International Classification of Diseases, 10<sup>th</sup> revision; SD, standard deviation.

**Table 2 Clinical practice.**

|                                                                            |                         | <b>Number of patients<br/>N (%)</b> |         |
|----------------------------------------------------------------------------|-------------------------|-------------------------------------|---------|
| Number of patients                                                         |                         | 145,219                             |         |
| Prescription of PIM                                                        | Yes (any type of PIM)   | 76,798                              | (52.9)  |
|                                                                            | Antidepressants         | 299                                 | (0.2)   |
|                                                                            | Anticholinergic drugs   | 163                                 | (0.1)   |
|                                                                            | Benzodiazepines         | 31,324                              | (21.6)  |
|                                                                            | Non-benzodiazepines     | 10,582                              | (7.3)   |
|                                                                            | Corticosteroids         | 16,879                              | (11.6)  |
|                                                                            | H1-receptor antagonists | 10,283                              | (7.1)   |
|                                                                            | H2-receptor antagonists | 17,360                              | (12.0)  |
|                                                                            | Opioids                 | 29,268                              | (20.2)  |
|                                                                            | Number of PIMs (drugs)  | 76,798                              | (100.0) |
|                                                                            | 1                       | 5,268                               | (6.9)   |
|                                                                            | 2                       | 7,232                               | (9.4)   |
|                                                                            | 3                       | 7,349                               | (9.6)   |
|                                                                            | ≥4                      | 56,949                              | (74.2)  |
| Number of PIMs (classes)                                                   | 76,798                  | (100.0)                             |         |
| 1                                                                          | 47,128                  | (61.4)                              |         |
| 2                                                                          | 21,637                  | (28.2)                              |         |
| 3                                                                          | 6,561                   | (8.5)                               |         |
| ≥4                                                                         | 1,472                   | (1.9)                               |         |
| Surgery                                                                    | Yes                     | 85,492                              | (58.9)  |
| Anesthesia type/duration:                                                  |                         | 85,492                              | (100.0) |
| Surgery + no<br>anesthesia/local<br>anesthesia/light general<br>anesthesia |                         | 35,048                              | (41.0)  |

|                                    |                                                |             |        |
|------------------------------------|------------------------------------------------|-------------|--------|
|                                    | Surgery + general anesthesia (<2 hours)        | 21,887      | (25.6) |
|                                    | Surgery + general anesthesia ( $\geq$ 2 hours) | 28,557      | (33.4) |
| <hr/>                              |                                                |             |        |
| Duration of hospitalization (days) | Mean (SD)                                      | 16.0 (12.1) |        |
| <hr/>                              |                                                |             |        |
|                                    | $\leq$ 1 week                                  | 22,542      | (15.5) |
|                                    | >1 week to $\leq$ 2 weeks                      | 55,709      | (38.4) |
|                                    | >2 weeks to $\leq$ 3 weeks                     | 38,342      | (26.4) |
|                                    | >3 weeks to $\leq$ 4 weeks                     | 17,004      | (11.7) |
|                                    | 4> weeks to $\leq$ 12 weeks                    | 11,046      | (7.6)  |
|                                    | >12 weeks                                      | 576         | (0.4)  |
| <hr/>                              |                                                |             |        |
| Use of ICU                         | Yes                                            | 33,718      | (23.2) |
| <hr/>                              |                                                |             |        |
| Duration of ICU (days)             | Mean (SD)                                      | 3.4 (3.1)   |        |
| <hr/>                              |                                                |             |        |
|                                    | 1 day                                          | 12,218      | (8.4)  |
|                                    | 2 days                                         | 5,970       | (4.1)  |
|                                    | 3 days                                         | 4,247       | (2.9)  |
|                                    | 4 days                                         | 3,104       | (2.1)  |
|                                    | 5 days                                         | 2,192       | (1.5)  |
|                                    | 6 days                                         | 1,608       | (1.1)  |
|                                    | $\geq$ 7 days                                  | 4,379       | (3.0)  |

ICU, intensive care unit; PIM, potentially inappropriate medication; SD, standard deviation.

**Table 3 Antipsychotics used for treating delirium.**

|                                           |             |           | Number of patients<br>N (%) |        |
|-------------------------------------------|-------------|-----------|-----------------------------|--------|
| Number of patients                        |             |           | 145,219                     |        |
| Antipsychotics used for delirium Yes      |             |           | 135,321 (93.2)              |        |
| Type of drug formulation                  | Haloperidol | INJ       | 82,490                      | (56.8) |
|                                           |             | TAB       | 1,913                       | (1.3)  |
|                                           |             | FGR       | 192                         | (0.1)  |
|                                           |             | SOL       | 13                          | (0.0)  |
|                                           | Risperidone | SOL       | 34,282                      | (23.6) |
|                                           |             | ODT       | 7,645                       | (5.3)  |
|                                           |             | TAB       | 4,958                       | (3.4)  |
|                                           |             | FGR       | 257                         | (0.2)  |
|                                           |             | INJ       | 6                           | (0.0)  |
|                                           | Quetiapine  | TAB       | 19,830                      | (13.7) |
|                                           |             | FGR       | 652                         | (0.4)  |
|                                           |             | SRT       | 20                          | (0.0)  |
|                                           | Olanzapine  | TAB       | 2,262                       | (1.6)  |
|                                           |             | ODT       | 915                         | (0.6)  |
|                                           |             | FGR       | 156                         | (0.1)  |
|                                           |             | INJ       | 11                          | (0.0)  |
| Perospirone                               | TAB         | 2,210     | (1.5)                       |        |
| Duration of prescription (days) Mean (SD) |             | 5.4 (8.1) |                             |        |

FGR, fine granule; INJ, injectable; ODT, orodispersable tablet; SD, standard deviation; SOL, solution; SRT, sustained-release tablet; TAB, tablet.



**Table 4 Patient outcome – Transfer to other hospitals/nursing homes and death.**

|                                              |                                                                                          | <b>Number of patients<br/>N (%)</b> |        |
|----------------------------------------------|------------------------------------------------------------------------------------------|-------------------------------------|--------|
| Number of patients                           |                                                                                          | 145,219                             |        |
| Transfer to other<br>hospitals/nursing homes | Yes                                                                                      | 32,651 (22.5)                       |        |
|                                              | Transfer to other hospitals or clinics                                                   | 22,081                              | (15.2) |
|                                              | Admission to social welfare facilities or<br>fee-based homes for the elderly, etc.       | 5,070                               | (3.5)  |
|                                              | Admission to facilities covered by public aid<br>providing long-term care to the elderly | 3,017                               | (2.1)  |
|                                              | Admission to long-term care health facilities                                            | 2,472                               | (1.7)  |
|                                              | Nursing home                                                                             | 11                                  | (0.0)  |
| Death                                        | Yes                                                                                      | 15,556                              | (10.7) |
|                                              | No                                                                                       | 129,637                             | (89.3) |

**FIGURE LEGENDS**

Figure 1 Patient selection flowchart.

DPC, Diagnosis Procedure Combination; ICD-10, International Classification of Diseases, 10<sup>th</sup> revision; MDV, Medical Data Vision.

Supplemental Figure 1 Patient selection flowchart for the sensitivity analysis.

MDV, Medical Data Vision.

For peer review only

## REFERENCES

- 1 American Psychiatric Association. Diagnostic And Statistical Manual Of Mental Disorders, Fifth Edition. Washington, DC: American Psychiatric Association Publishing 2013: 596-97.
- 2 Oh ES, Fong TG, Hshieh TT, et al. Delirium in older persons: advances in diagnosis and treatment. *JAMA* 2017;318:1161–74.
- 3 Pezzullo L, Streatfeild J, Hickson J, et al. Economic impact of delirium in Australia: a cost of illness study. *BMJ Open* 2019;9:e027514.
- 4 Siddiqi N, House AO, Holmes JD. Occurrence and outcome of delirium in medical in-patients: a systematic literature review. *Age Ageing* 2006;35:350–64.
- 5 Fricchione GL, Nejad SH, Esses JA, et al. Postoperative delirium. *Am J Psychiatry* 2008;165:803–12.
- 6 Marcantonio ER. Postoperative delirium: a 76-year-old woman with delirium following surgery. *JAMA* 2012;308:73–81.
- 7 Hshieh TT, Inouye SK, Oh ES. Delirium in the elderly. *Clin Geriatr Med* 2020;36:183–99.
- 8 Inouye SK, Westendorp RG, Saczynski JS. Delirium in elderly people. *Lancet* 2014;383:911–22.
- 9 Goldberg TE, Chen C, Wang Y, et al. Association of delirium with long-term cognitive decline: a meta-analysis. *JAMA Neurol* 2020;77:1373–81.
- 10 Inouye SK, Foreman MD, Mion LC, et al. Nurses' recognition of delirium and its symptoms: comparison of nurse and researcher ratings. *Arch Intern Med* 2001;161:2467–73.
- 11 Chen CC, Li HC, Liang JT, et al. Effect of a modified hospital elder life program on delirium and length of hospital stay in patients undergoing abdominal surgery: a cluster randomized clinical trial. *JAMA Surg* 2017;152:827–34.
- 12 Janssen TL, Alberts AR, Hooft L, et al. Prevention of postoperative delirium in elderly patients planned for elective surgery: systematic review and meta-analysis. *Clin Interv Aging* 2019;14:1095–117.
- 13 Ogawa A, Okumura Y, Fujisawa D, et al. Quality of care in hospitalized cancer patients before and after implementation of a systematic prevention program for delirium: the DELTA exploratory trial. *Support Care Cancer* 2019;27:557–65.
- 14 Whalin MK, Kreuzer M, Halenda KM, et al. Missed opportunities for intervention in a patient with prolonged postoperative delirium. *Clin Ther* 2015;37:2706–10.
- 15 About Insurance Medical Treatment Related to off-Label Use of Pharmaceutical Products. 2011. Accessed June 6, 2022. [https://www.hospital.or.jp/pdf/14\\_20110928\\_01.pdf](https://www.hospital.or.jp/pdf/14_20110928_01.pdf)
- 16 Clinical guideline for the treatment of delirium, 2<sup>nd</sup> edition (Japanese Society of General Hospital Psychiatry Practice Guidelines 1). Tokyo, Japan: Seiwa Shoten Publishers. PP1-32 & PP85-111
- 17 Noda Y, Tarasawa K, Fushimi K, et al. Drug treatment for patients with postoperative delirium and consultation-liaison psychiatry in Japan: a retrospective observational study of a nationwide hospital claims database. *ACE* 2021;3:116–26.
- 18 Ota K, Nakamura M, Makiuchi T, et al. Surveillance of antipsychotic drugs use in elderly patients with postoperative delirium (Japanese). In Proceedings of the The Annual Meeting of the Pharmaceutical Society of Japan. Annual meeting of the Pharmaceutical Society of Japan 2011.

- 1  
2  
3  
4 19 McCoy TH, Jr., Snapper L, Stern TA, et al. Underreporting of Delirium in Statewide  
5 Claims Data: Implications for Clinical Care and Predictive Modeling.  
6 *Psychosomatics*. 2016;57:480–88.
- 7 20 Pal N, Abernathy JH, 3<sup>rd</sup>, Taylor MA, et al. Dexmedetomidine, delirium, and adverse  
8 outcomes: analysis of the Society of Thoracic Surgeons Adult Cardiac Surgery  
9 Database. *Ann Thorac Surg* 2021.
- 10 21 Ahn EJ, Kim HJ, Kim KW, et al. Comparison of general anaesthesia and regional  
11 anaesthesia in terms of mortality and complications in elderly patients with hip  
12 fracture: a nationwide population-based study. *BMJ Open* 2019;9:e029245.
- 13 22 Kim DH, Lee J, Kim CA, et al. Evaluation of algorithms to identify delirium in  
14 administrative claims and drug utilization database. *Pharmacoepidemiol Drug Saf*  
15 2017;26:945–53.
- 16 23 Park Y, Bateman BT, Kim DH, et al. Use of haloperidol versus atypical  
17 antipsychotics and risk of in-hospital death in patients with acute myocardial  
18 infarction: cohort study. *BMJ* 2018;360:k1218.
- 19 24 Sakakibara Y, Ochibe T, Amari S, et al. Study on the risk factors for postoperative  
20 delirium using the National Health Insurance Claims Database in Japan. *Jpn J Pharm*  
21 *Health Care Sci* 2019;45:195–207.
- 22 25 Zimmerman KM, Paquin AM, Rudolph JL. Antipsychotic prescription to identify  
23 delirium: results from two cohorts. *Clin Pharmacol* 2017;9:113–7.
- 24 26 Hope C, Estrada N, Weir C, et al. Documentation of delirium in the VA electronic  
25 health record. *BMC Res Notes* 2014;7:208.
- 26 27 Inouye SK, van Dyck CH, Alessi CA, et al. Clarifying confusion: the confusion  
27 assessment method. A new method for detection of delirium. *Ann Intern Med*  
28 1990;113:941–8.
- 29 28 Johnson JC, Kerse NM, Gottlieb G, et al. Prospective versus retrospective methods of  
30 identifying patients with delirium. *J Am Geriatr Soc* 1992;40:316–9.
- 31 29 Mahoney FI, Barthel DW. Functional Evaluation: The Barthel Index. *Md State Med J*.  
32 1965;14:61–65.
- 33 30 By the 2019 American Geriatrics Society Beers Criteria<sup>®</sup> Update Expert Panel.  
34 American Geriatrics Society 2019 Updated AGS Beers Criteria<sup>®</sup> for potentially  
35 inappropriate medication use in older adults. *J Am Geriatr Soc* 2019;67:674–94.
- 36 31 Kojima T, Mizukami K, Tomita N, et al. Screening tool for older persons' appropriate  
37 prescriptions for Japanese: report of the Japan Geriatrics Society Working Group on  
38 "Guidelines for medical treatment and its safety in the elderly". *Geriatr Gerontol Int*  
39 2016;16:983–1001.
- 40 32 Noshiro Y, Imai T, Sakai M, et al. Relationship between the onset of delirium during  
41 hospitalization and the use of high-risk drugs for delirium. *Med J Matsue City Hosp*  
42 2018;1.
- 43 33 Ahmed S, Leurent B, Sampson EL. Risk factors for incident delirium among older  
44 people in acute hospital medical units: a systematic review and meta-analysis. *Age*  
45 *Ageing* 2014;43:326–33.
- 46 34 Inouye SK. Delirium in older persons. *N Engl J Med* 2006;354:1157–65.
- 47 35 Fujii S, Tanimukai H, Kashiwagi Y. Comparison and analysis of delirium induced by  
48 histamine h(2) receptor antagonists and proton pump inhibitors in cancer patients.  
49 *Case Rep Oncol* 2012;5:409–12.
- 50 36 Clegg A, Young JB. Which medications to avoid in people at risk of delirium: a  
51 systematic review. *Age Ageing* 2011;40:23–9.
- 52 37 Gaudreau JD, Gagnon P, Harel F, et al. Psychoactive medications and risk of delirium  
53 in hospitalized cancer patients. *J Clin Oncol* 2005;23:6712–8.
- 54  
55  
56  
57  
58  
59  
60

- 1  
2  
3 38 International Narcotics Control Board, Vienna International Centre, Vienna, Austria:  
4 International Narcotics Control Board. Availability of Internationally Controlled  
5 Drugs: Ensuring Adequate Access for Medical and Scientific Purposes. 2015.  
6 Accessed June, 6 2022.  
7 [https://www.incb.org/documents/Publications/AnnualReports/AR2015/English/Suppl  
8 e  
9 ment-AR15\\_availability\\_English.pdf](https://www.incb.org/documents/Publications/AnnualReports/AR2015/English/Supplement-AR15_availability_English.pdf).
- 10 39 Rudolph JL, Salow MJ, Angelini MC, et al. The anticholinergic risk scale and  
11 anticholinergic adverse effects in older persons. *Arch Intern Med* 2008;168:508–13.  
12 40 Egberts A, Moreno-Gonzalez R, Alan H, et al. Anticholinergic drug burden and  
13 delirium: a systematic review. *J Am Med Dir Assoc* 2021;22:65–73.e4.  
14 41 Inouye SK, Charpentier PA. Precipitating factors for delirium in hospitalized elderly  
15 persons. Predictive model and interrelationship with baseline vulnerability. *JAMA*  
16 1996;275:852–7.  
17 42 Okumura Y, Hatta K, Wada K, et al. Expert opinions on the first-line pharmacological  
18 treatment for delirium in Japan: a conjoint analysis. *Int Psychogeriatr* 2016;28:1041–  
19 50.  
20 43 Hollis J, Grayson D, Forrester L, et al. Antipsychotic medication dispensing and risk  
21 of death in veterans and war widows 65 years and older. *Am J Geriatr Psychiatry*  
22 2007;15:932–41.  
23 44 Agar MR, Lawlor PG, Quinn S, et al. Efficacy of oral risperidone, haloperidol, or  
24 placebo for symptoms of delirium among patients in palliative care: a randomized  
25 clinical trial. *JAMA Intern Med* 2017;177:34–42.  
26 45 Boettger S, Jenewein J, Breitbart W. Haloperidol, risperidone, olanzapine and  
27 aripiprazole in the management of delirium: a comparison of efficacy, safety, and side  
28 effects. *Palliat Support Care* 2015;13:1079–85.  
29 46 Miyaji S, Yamamoto K, Hoshino S, et al. Comparison of the risk of adverse events  
30 between risperidone and haloperidol in delirium patients. *Psychiatry Clin Neurosci*  
31 2007;61:275–82.  
32 47 The National Institute for Health and Care Excellence (NICE): London. Delirium:  
33 prevention, diagnosis and management. 2019. Accessed June 6, 2022.  
34 48 Muench J, Hamer AM. Adverse effects of antipsychotic medications. *Am Fam*  
35 *Physician* 2010;81:617–22.  
36 49 Lim CJ, Trevino C, Tampi RR. Can olanzapine cause delirium in the elderly? *Ann*  
37 *Pharmacother* 2006;40:135–8.  
38  
39  
40  
41  
42  
43  
44  
45  
46  
47  
48  
49  
50  
51  
52  
53  
54  
55  
56  
57  
58  
59  
60

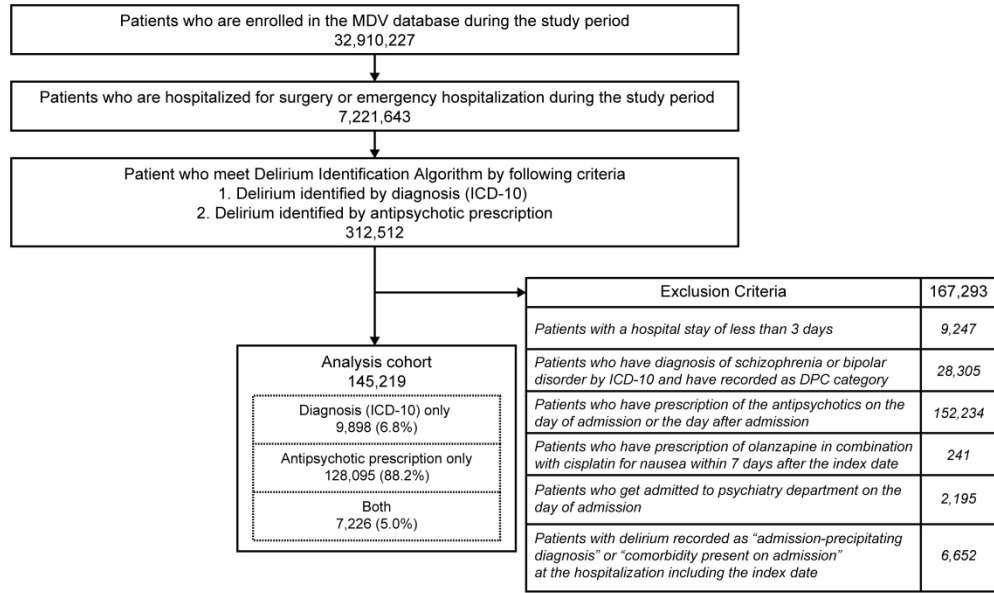

Figure 1 Patient selection flowchart. DPC, Diagnosis Procedure Combination; ICD-10, International Classification of Diseases, 10th revision; MDV, Medical Data Vision.

**Supplemental Table 1 ICD-10 codes for delirium diagnosis.**

| Number of delirium patients identified by diagnosis (ICD-10) | Total                                         | Number of patients |        |
|--------------------------------------------------------------|-----------------------------------------------|--------------------|--------|
|                                                              |                                               | N                  | (%)    |
|                                                              |                                               | 17,124             | (11.8) |
|                                                              | Delirium not superimposed on dementia (F05.0) | 977                | (0.7)  |
|                                                              | Delirium superimposed on dementia (F05.1)     | 1,447              | (1.0)  |
|                                                              | Other delirium (F05.8)                        | 37                 | (0.0)  |
|                                                              | Subacute infection psychosis                  | 0                  | (0.0)  |
|                                                              | Subacute organic reaction                     | 0                  | (0.0)  |
|                                                              | Subacute organic psychiatric syndrome         | 0                  | (0.0)  |
|                                                              | Subacute cerebral syndrome                    | 5                  | (0.0)  |
|                                                              | Acute infectious psychosis                    | 1                  | (0.0)  |
|                                                              | Acute organic reaction                        | 3                  | (0.0)  |
|                                                              | Acute organic psychiatric syndrome            | 2                  | (0.0)  |
|                                                              | Acute confusional state                       | 14                 | (0.0)  |
|                                                              | Acute brain syndrome                          | 11                 | (0.0)  |
|                                                              | Nonalcoholic acute confusional state          | 1                  | (0.0)  |
|                                                              | Delirium, unspecified (F05.9)                 | 14,801             | (10.2) |
|                                                              | Delirium                                      | 11,828             | (8.1)  |
|                                                              | Nocturnal delirium                            | 2,494              | (1.7)  |
|                                                              | Senile nocturnal delirium                     | 498                | (0.3)  |

ICD-10, International Classification of Diseases, 10th revision.

**Supplemental Table 2 Definition of cognitive impairment.**

|                      |                                                                        | <b>Number of patients<br/>N (%)</b> |        |
|----------------------|------------------------------------------------------------------------|-------------------------------------|--------|
| Number of patients   |                                                                        | 145,219                             |        |
| Cognitive impairment | Yes                                                                    | 40,376                              | (27.8) |
|                      | Diagnosis of dementia (ICD-10)                                         | 21,498                              | (14.8) |
|                      | Prescription of anti-dementia drugs                                    | 12,032                              | (8.3)  |
|                      | Low degree of independence in daily life for the elderly with dementia | 25,537                              | (17.6) |

ICD-10, International Classification of Diseases, 10th revision.



**Supplemental Table 3 Comorbidities (diseases present in  $\geq 3\%$  of patients with delirium in each category).**

| Category                                              | Disease                                                      | ICD-10 | Number of patients<br>N (%) |
|-------------------------------------------------------|--------------------------------------------------------------|--------|-----------------------------|
| Number of patients                                    |                                                              |        | 145,219                     |
| <b>Circulatory system diseases</b>                    |                                                              |        |                             |
|                                                       | Essential (primary) hypertension                             | I10    | 47,887 (33.0)               |
|                                                       | Heart failure                                                | I50    | 23,214 (16.0)               |
|                                                       | Atrial fibrillation and flutter                              | I48    | 12,774 (8.8)                |
|                                                       | Angina pectoris                                              | I20    | 11,296 (7.8)                |
|                                                       | Sequelae of cerebrovascular disease                          | I69    | 8,759 (6.0)                 |
|                                                       | Cerebral infarction                                          | I63    | 6,577 (4.5)                 |
|                                                       | Aortic aneurysm and dissection                               | I71    | 4,432 (3.1)                 |
| <b>Endocrine, nutritional, and metabolic diseases</b> |                                                              |        |                             |
|                                                       | Type 2 diabetes mellitus                                     | E11    | 23,809 (16.4)               |
|                                                       | Disorders of lipoprotein metabolism and other lipidemia      | E78    | 17,530 (12.1)               |
|                                                       | Volume depletion                                             | E86    | 13,698 (9.4)                |
|                                                       | Other disorders of fluid, electrolyte, and acid-base balance | E87    | 4,896 (3.4)                 |
|                                                       | Unspecified diabetes mellitus                                | E14    | 4,364 (3.0)                 |
| <b>Digestive system diseases</b>                      |                                                              |        |                             |
|                                                       | Gastroesophageal reflux disease                              | K21    | 13,242 (9.1)                |
|                                                       | Other functional intestinal disorders                        | K59    | 10,515 (7.2)                |
|                                                       | Gastric ulcer                                                | K25    | 9,864 (6.8)                 |
|                                                       | Cholelithiasis                                               | K80    | 8,230 (5.7)                 |

|       |                                                                  |             |        |        |
|-------|------------------------------------------------------------------|-------------|--------|--------|
|       | Paralytic ileus and intestinal obstruction without hernia        | K56         | 5,276  | (3.6)  |
|       | Gastritis and duodenitis                                         | K29         | 5,025  | (3.5)  |
|       | Other diseases of the biliary tract                              | K83         | 4,850  | (3.3)  |
| <hr/> |                                                                  |             |        |        |
|       | Malignant neoplasms                                              | C00-<br>C97 | 41,710 | (28.7) |
|       | Malignant neoplasm of stomach                                    | C16         | 7,644  | (5.3)  |
|       | Malignant neoplasm of colon                                      | C18         | 7,163  | (4.9)  |
|       | Secondary malignant neoplasm of respiratory and digestive organs | C78         | 5,631  | (3.9)  |
|       | Malignant neoplasm of bronchus and lung                          | C34         | 4,433  | (3.1)  |
| <hr/> |                                                                  |             |        |        |
|       | Respiratory system diseases                                      | J00-<br>J99 | 36,958 | (25.4) |
|       | Respiratory failure, not elsewhere classified                    | J96         | 14,385 | (9.9)  |
|       | Pneumonia, organism unspecified                                  | J18         | 7,004  | (4.8)  |
|       | Pneumonitis due to solids and liquids                            | J69         | 6,991  | (4.8)  |
| <hr/> |                                                                  |             |        |        |
|       | Nervous system diseases                                          | G00-<br>G99 | 28,557 | (19.7) |
|       | Alzheimer disease                                                | G30         | 9,659  | (6.7)  |
|       | Sleep disorders                                                  | G47         | 9,351  | (6.4)  |
| <hr/> |                                                                  |             |        |        |
|       | Genitourinary system diseases                                    | N00-<br>N99 | 25,617 | (17.6) |
|       | Chronic kidney disease                                           | N18         | 8,208  | (5.7)  |
|       | Benign prostatic hyperplasia                                     | N40         | 5,360  | (3.7)  |
| <hr/> |                                                                  |             |        |        |
|       | Mental and behavioral disorders                                  | F00-<br>F99 | 20,047 | (13.8) |
|       | Unspecified dementia                                             | F03         | 8,934  | (6.2)  |
| <hr/> |                                                                  |             |        |        |
|       | Musculoskeletal system/connective tissue diseases                | M00-<br>M99 | 17,523 | (12.1) |

|                                                        |                              |                                |        |        |
|--------------------------------------------------------|------------------------------|--------------------------------|--------|--------|
| Injury                                                 |                              | S00-<br>T35                    | 15,866 | (10.9) |
|                                                        | Fracture of femur            | S72                            | 6,427  | (4.4)  |
| Blood diseases                                         |                              | D50-<br>D89                    | 13,458 | (9.3)  |
|                                                        | Iron deficiency anemia       | D50                            | 6,881  | (4.7)  |
| Infectious disease<br>(excluding parasitic<br>disease) | -                            | A00-<br>A49<br>/<br>B90-<br>99 | 12,442 | (8.6)  |
| Skin/subcutaneous tissue<br>disease                    | -                            | L00-<br>L99                    | 4,094  | (2.8)  |
| Eye disease                                            | -                            | H00-<br>H59                    | 1,565  | (1.1)  |
| Poisoning                                              | -                            | T36-<br>T65                    | 806    | (0.6)  |
| Ear disease                                            | -                            | H60-<br>H95                    | 624    | (0.4)  |
| Others                                                 |                              |                                | 39,232 | (27.0) |
|                                                        | Somnolence, stupor, and coma | R40                            | 6,943  | (4.8)  |

ICD-10, International Classification of Diseases, 10th revision.

**Supplemental Table 4 Hospitalization information.**

|                         |                                           | Number of patients<br>N (%) |        |
|-------------------------|-------------------------------------------|-----------------------------|--------|
| Number of patients      |                                           | 145,219                     |        |
| Type of hospitalization | Hospitalization with elective surgery     | 52,766                      | (36.3) |
|                         | Emergency hospitalization without surgery | 59,727                      | (41.1) |
|                         | Emergency hospitalization with surgery    | 32,726                      | (22.5) |
| Number of beds          | 0–199 beds                                | 6,760                       | (4.7)  |
|                         | 200–499 beds                              | 79,995                      | (55.1) |
|                         | ≥500 beds                                 | 58,464                      | (40.3) |
| Inpatient department    | Surgery                                   | 28,656                      | (19.7) |
|                         | Internal Medicine                         | 28,232                      | (19.4) |
|                         | Gastroenterology                          | 15,445                      | (10.6) |
|                         | Cardiology                                | 12,337                      | (8.5)  |
|                         | Orthopedics                               | 11,302                      | (7.8)  |
|                         | Neurosurgery                              | 8,144                       | (5.6)  |
|                         | Urology                                   | 7,031                       | (4.8)  |
|                         | Cardiovascular Surgery                    | 6,042                       | (4.2)  |
|                         | Respiratory Medicine                      | 5,506                       | (3.8)  |
|                         | Gastrointestinal Surgery                  | 4,093                       | (2.8)  |
|                         | Emergency Medicine                        | 3,414                       | (2.4)  |
|                         | Neurology                                 | 3,008                       | (2.1)  |
|                         | Pulmonary Surgery                         | 1,734                       | (1.2)  |
|                         | Obstetrics & Gynecology                   | 1,528                       | (1.1)  |
| Otolaryngology          | 1,416                                     | (1.0)                       |        |
| Nephrology              | 1,252                                     | (0.9)                       |        |
| Hematology              | 729                                       | (0.5)                       |        |

|    |         |                                                |               |
|----|---------|------------------------------------------------|---------------|
| 1  |         |                                                |               |
| 2  |         |                                                |               |
| 3  |         | Endocrinology, Metabolism & Diabetology        | 706 (0.5)     |
| 4  |         |                                                |               |
| 5  |         | Reconstructive Surgery                         | 625 (0.4)     |
| 6  |         |                                                |               |
| 7  |         | Ophthalmology                                  | 606 (0.4)     |
| 8  |         |                                                |               |
| 9  |         | Others                                         | 2,977 (2.1)   |
| 10 |         |                                                |               |
| 11 |         | Unknown                                        | 436 (0.3)     |
| 12 |         |                                                |               |
| 13 |         |                                                |               |
| 14 | Surgery | Yes                                            | 85,492 (58.9) |
| 15 |         |                                                |               |
| 16 |         | Surgery sites:                                 |               |
| 17 |         |                                                |               |
| 18 |         | Abdomen                                        | 38,898 (26.8) |
| 19 |         |                                                |               |
| 20 |         | Heart and blood vessels                        | 15,240 (10.5) |
| 21 |         |                                                |               |
| 22 |         | Musculoskeletal system, extremities, and trunk | 10,424 (7.2)  |
| 23 |         |                                                |               |
| 24 |         | Thoracic                                       | 6,061 (4.2)   |
| 25 |         |                                                |               |
| 26 |         | Urinary system and adrenal glands              | 4,893 (3.4)   |
| 27 |         |                                                |               |
| 28 |         | Nervous system and cranial                     | 3,708 (2.6)   |
| 29 |         |                                                |               |
| 30 |         | Skin or subcutaneous tissue                    | 3,076 (2.1)   |
| 31 |         |                                                |               |
| 32 |         | Genital                                        | 2,557 (1.8)   |
| 33 |         |                                                |               |
| 34 |         | Ear, nose, and throat                          | 1,113 (0.8)   |
| 35 |         |                                                |               |
| 36 |         | Face, mouth, and neck                          | 738 (0.5)     |
| 37 |         |                                                |               |
| 38 |         | Eyes                                           | 606 (0.4)     |
| 39 |         |                                                |               |
| 40 |         |                                                |               |
| 41 |         |                                                |               |
| 42 |         |                                                |               |
| 43 |         |                                                |               |
| 44 |         |                                                |               |
| 45 |         |                                                |               |
| 46 |         |                                                |               |
| 47 |         |                                                |               |
| 48 |         |                                                |               |
| 49 |         |                                                |               |
| 50 |         |                                                |               |
| 51 |         |                                                |               |
| 52 |         |                                                |               |
| 53 |         |                                                |               |
| 54 |         |                                                |               |
| 55 |         |                                                |               |
| 56 |         |                                                |               |
| 57 |         |                                                |               |
| 58 |         |                                                |               |
| 59 |         |                                                |               |
| 60 |         |                                                |               |

**Supplemental Table 5 Sensitivity analyses: Delirium identification algorithm, patient characteristics, clinical practice, delirium treatment with antipsychotics, and patient outcomes.**

| Characteristics                                         |                                     | Sensitivity analysis 1 |        | Sensitivity analysis 2 |        |
|---------------------------------------------------------|-------------------------------------|------------------------|--------|------------------------|--------|
|                                                         |                                     | N (%)                  |        | N (%)                  |        |
| Number of subjects                                      |                                     | 184,817                |        | 213,844                |        |
| <b>Delirium identification algorithm</b>                |                                     |                        |        |                        |        |
| Patients meeting criteria                               | Diagnosis (ICD-10) only             | 8,401                  | (4.5)  | 9,874                  | (4.6)  |
|                                                         | Antipsychotic prescription only     | 167,756                | (90.8) | 193,507                | (90.5) |
|                                                         | Both                                | 8,660                  | (4.7)  | 10,463                 | (4.9)  |
| <b>Patient demographic and baseline characteristics</b> |                                     |                        |        |                        |        |
| Age (years)                                             | Mean (SD)                           | 76.1 (13.8)            |        | 76.3 (14.1)            |        |
|                                                         | ≤64                                 | 29,659                 | (16.0) | 34,204                 | (16.0) |
|                                                         | 65–74                               | 37,770                 | (20.4) | 41,091                 | (19.2) |
|                                                         | 75–84                               | 62,820                 | (34.0) | 71,825                 | (33.6) |
|                                                         | ≥85                                 | 54,568                 | (29.5) | 66,724                 | (31.2) |
| Sex                                                     | Male                                | 105,167                | (56.9) | 120,696                | (56.4) |
|                                                         | Female                              | 79,650                 | (43.1) | 93,148                 | (43.6) |
| ADL score (point)                                       | Dependent group (0–59)              | 96,591                 | (52.3) | 113,005                | (52.8) |
|                                                         | Independent group (60–100)          | 85,101                 | (46.0) | 97,296                 | (45.5) |
|                                                         | Unknown                             | 3,125                  | (1.7)  | 3,543                  | (1.7)  |
| Cognitive impairment                                    | Yes                                 | 49,445                 | (26.8) | 60,930                 | (28.5) |
|                                                         | Diagnosis of dementia (ICD-10)      | 26,470                 | (14.3) | 33,014                 | (15.4) |
|                                                         | Prescription of anti-dementia drugs | 15,214                 | (8.2)  | 18,685                 | (8.7)  |
|                                                         | Low degree of independence*         | 30,820                 | (16.7) | 38,575                 | (18.0) |
| Inpatient department                                    | Surgery                             | 36,983                 | (20.0) | 38,799                 | (18.1) |
|                                                         | Internal Medicine                   | 33,955                 | (18.4) | 40,868                 | (19.1) |
|                                                         | Gastroenterology                    | 20,135                 | (10.9) | 26,557                 | (12.4) |
|                                                         | Cardiology                          | 14,845                 | (8.0)  | 19,516                 | (9.1)  |
|                                                         | Orthopedics                         | 14,769                 | (8.0)  | 15,886                 | (7.4)  |
|                                                         | Neurosurgery                        | 10,039                 | (5.4)  | 12,943                 | (6.1)  |
|                                                         | Urology                             | 8,619                  | (4.7)  | 10,501                 | (4.9)  |
|                                                         | Cardiovascular Surgery              | 7,953                  | (4.3)  | 7,405                  | (3.5)  |
|                                                         | Respiratory Medicine                | 7,056                  | (3.8)  | 7,484                  | (3.5)  |
|                                                         | Gastrointestinal Surgery            | 5,427                  | (2.9)  | 4,905                  | (2.3)  |
|                                                         | Emergency Medicine                  | 4,047                  | (2.2)  | 5,245                  | (2.5)  |
|                                                         | Neurology                           | 3,598                  | (1.9)  | 4,648                  | (2.2)  |
|                                                         | Pulmonary Surgery                   | 2,134                  | (1.2)  | 2,297                  | (1.1)  |
| Obstetrics & Gynecology                                 | 2,034                               | (1.1)                  | 2,274  | (1.1)                  |        |
| Otolaryngology                                          | 2,033                               | (1.1)                  | 2,047  | (1.0)                  |        |

| Characteristics                    |                                                   | Sensitivity analysis 1 |        | Sensitivity analysis 2 |        |
|------------------------------------|---------------------------------------------------|------------------------|--------|------------------------|--------|
|                                    |                                                   | N (%)                  |        | N (%)                  |        |
|                                    | Nephrology                                        | 1,728                  | (0.9)  | 1,755                  | (0.8)  |
|                                    | General Medicine                                  | 1,272                  | (0.7)  | 1,574                  | (0.7)  |
|                                    | Hematology                                        | 1,024                  | (0.6)  | 974                    | (0.5)  |
|                                    | Endocrinology, Metabolism & Diabetology           | 859                    | (0.5)  | 1,037                  | (0.5)  |
|                                    | Reconstructive Surgery                            | 905                    | (0.5)  | 958                    | (0.4)  |
|                                    | Ophthalmology                                     | 720                    | (0.4)  | 1,040                  | (0.5)  |
|                                    | Others                                            | 4,093                  | (2.2)  | 4,550                  | (2.1)  |
|                                    | Unknown                                           | 589                    | (0.3)  | 581                    | (0.3)  |
| Comorbidities                      | Circulatory system diseases                       | 103,602                | (56.1) | 119,306                | (55.8) |
|                                    | Endocrine, nutritional, and metabolic diseases    | 77,200                 | (41.8) | 86,310                 | (40.4) |
|                                    | Digestive system diseases                         | 76,319                 | (41.3) | 88,300                 | (41.3) |
|                                    | Malignant neoplasms                               | 56,282                 | (30.5) | 58,680                 | (27.4) |
|                                    | Others                                            | 51,859                 | (28.1) | 57,420                 | (26.9) |
|                                    | Respiratory system diseases                       | 47,586                 | (25.7) | 52,118                 | (24.4) |
|                                    | Nervous system diseases                           | 36,193                 | (19.6) | 42,476                 | (19.9) |
|                                    | Genitourinary system diseases                     | 32,942                 | (17.8) | 36,993                 | (17.3) |
|                                    | Mental and behavioral disorders                   | 24,824                 | (13.4) | 30,773                 | (14.4) |
|                                    | Musculoskeletal system/connective tissue diseases | 22,601                 | (12.2) | 24,732                 | (11.6) |
|                                    | Injury                                            | 20,340                 | (11.0) | 23,901                 | (11.2) |
|                                    | Blood diseases                                    | 18,251                 | (9.9)  | 19,041                 | (8.9)  |
|                                    | Infectious disease (excluding parasitic disease)  | 16,392                 | (8.9)  | 17,308                 | (8.1)  |
|                                    | Skin/subcutaneous tissue disease                  | 5,688                  | (3.1)  | 5,836                  | (2.7)  |
|                                    | Eye disease                                       | 1,960                  | (1.1)  | 2,445                  | (1.1)  |
| Poisoning                          | 876                                               | (0.5)                  | 1,399  | (0.7)                  |        |
| Ear disease                        | 793                                               | (0.4)                  | 927    | (0.4)                  |        |
| <b>Hospitalization information</b> |                                                   |                        |        |                        |        |
| Type of hospitalization            | Hospitalization for elective surgery              | 52,647                 | (28.5) | 64,141                 | (30.0) |
|                                    | Emergency hospitalization without surgery         | 71,805                 | (38.9) | 88,286                 | (41.3) |
|                                    | Emergency hospitalization with surgery            | 44,391                 | (24.0) | 48,568                 | (22.7) |
|                                    | Unknown                                           | 15,974                 | (8.6)  | 12,849                 | (6.0)  |
| Number of beds                     | 0–199                                             | 8,992                  | (4.9)  | 9,895                  | (4.6)  |
|                                    | 200–499                                           | 101,596                | (55.0) | 117,555                | (55.0) |
|                                    | ≥500                                              | 74,229                 | (40.2) | 86,394                 | (40.4) |

| Characteristics          |                                                | Sensitivity analysis 1 |        | Sensitivity analysis 2 |        |
|--------------------------|------------------------------------------------|------------------------|--------|------------------------|--------|
|                          |                                                | N (%)                  |        | N (%)                  |        |
| <b>Clinical practice</b> |                                                |                        |        |                        |        |
| Prescription of PIM      | Yes                                            | 94,998                 | (51.4) | 69,827                 | (32.7) |
|                          | Antidepressants                                | 371                    | (0.2)  | 254                    | (0.1)  |
|                          | Anticholinergic drugs                          | 194                    | (0.1)  | 137                    | (0.1)  |
|                          | Benzodiazepines                                | 38,988                 | (21.1) | 28,269                 | (13.2) |
|                          | Non-benzodiazepines                            | 12,954                 | (7.0)  | 8,780                  | (4.1)  |
|                          | Corticosteroids                                | 21,746                 | (11.8) | 13,734                 | (6.4)  |
|                          | H1-receptor antagonists                        | 12,388                 | (6.7)  | 6,959                  | (3.3)  |
|                          | H2-receptor antagonists                        | 21,028                 | (11.4) | 15,246                 | (7.1)  |
|                          | Opioids                                        | 35,588                 | (19.3) | 19,253                 | (9.0)  |
| Prescription of PIM      | 1                                              | 5,640                  | (3.1)  | 4,728                  | (2.2)  |
| (number of PIM           | 2                                              | 7,794                  | (4.2)  | 6,064                  | (2.8)  |
| drugs)                   | 3                                              | 7,985                  | (4.3)  | 6,451                  | (3.0)  |
|                          | ≥4                                             | 73,579                 | (39.8) | 52,584                 | (24.6) |
| Prescription of PIM      | 1                                              | 58,500                 | (31.7) | 51,123                 | (23.9) |
| (number of PIM           | 2                                              | 26,719                 | (14.5) | 15,136                 | (7.1)  |
| classes)                 | 3                                              | 8,011                  | (4.3)  | 3,089                  | (1.4)  |
|                          | ≥4                                             | 1,768                  | (1.0)  | 479                    | (0.2)  |
| Surgery                  | Yes                                            | 113,012                | (61.1) | 125,558                | (58.7) |
|                          | Surgery sites:                                 |                        |        |                        |        |
|                          | Skin or subcutaneous tissue                    | 4,477                  | (2.4)  | 4,672                  | (2.2)  |
|                          | Musculoskeletal system, extremities, and trunk | 13,859                 | (7.5)  | 14,564                 | (6.8)  |
|                          | Nervous system and cranial                     | 4,825                  | (2.6)  | 5,695                  | (2.7)  |
|                          | Eyes                                           | 704                    | (0.4)  | 1,060                  | (0.5)  |
|                          | Ear, nose, and throat                          | 1,895                  | (1.0)  | 1,570                  | (0.7)  |
|                          | Face, mouth, and neck                          | 874                    | (0.5)  | 1,192                  | (0.6)  |
|                          | Thoracic                                       | 7,613                  | (4.1)  | 9,017                  | (4.2)  |
|                          | Heart and blood vessels                        | 21,172                 | (11.5) | 21,846                 | (10.2) |
|                          | Abdomen                                        | 51,061                 | (27.6) | 57,020                 | (26.7) |
|                          | Urinary system and adrenal gland               | 6,173                  | (3.3)  | 7,365                  | (3.4)  |
|                          | Genital                                        | 2,964                  | (1.6)  | 3,933                  | (1.8)  |
|                          | Anesthesia type/duration:                      |                        |        |                        |        |
|                          | Surgery + no/local/light general anesthesia    | 49,357                 | (26.7) | 58,743                 | (27.5) |
|                          | Surgery + general anesthesia (<2 hours)        | 27,276                 | (14.8) | 32,179                 | (15.0) |



| Characteristics                         |                                                |     | Sensitivity analysis 1 |        | Sensitivity analysis 2 |        |
|-----------------------------------------|------------------------------------------------|-----|------------------------|--------|------------------------|--------|
|                                         |                                                |     | N (%)                  |        | N (%)                  |        |
|                                         | Surgery + general anesthesia ( $\geq 2$ hours) |     | 36,379                 | (19.7) | 34,636                 | (16.2) |
| Duration of hospitalization             | Mean (SD), days                                |     | 19.5 (18.9)            |        | 14.9 (11.7)            |        |
|                                         | $\leq 1$ week                                  |     | 22,368                 | (12.1) | 44,771                 | (20.9) |
|                                         | $> 1$ week to $\leq 2$ weeks                   |     | 60,821                 | (32.9) | 81,671                 | (38.2) |
|                                         | $> 2$ weeks to $\leq 3$ weeks                  |     | 48,981                 | (26.5) | 50,271                 | (23.5) |
|                                         | $> 3$ weeks to $\leq 4$ weeks                  |     | 26,094                 | (14.1) | 22,322                 | (10.4) |
|                                         | $> 4$ weeks to $\leq 12$ weeks                 |     | 24,247                 | (13.1) | 14,092                 | (6.6)  |
|                                         | $> 12$ weeks                                   |     | 2,306                  | (1.2)  | 717                    | (0.3)  |
| Use of ICU                              | Yes                                            |     | 42,565                 | (23.0) | 47,127                 | (22.0) |
| Duration, days                          | Mean (SD)                                      |     | 3.8 (3.7)              |        | 3.3 (3.0)              |        |
|                                         | 1 day                                          |     | 14,765                 | (8.0)  | 17,264                 | (8.1)  |
|                                         | 2 days                                         |     | 7,146                  | (3.9)  | 8,810                  | (4.1)  |
|                                         | 3 days                                         |     | 5,101                  | (2.8)  | 6,174                  | (2.9)  |
|                                         | 4 days                                         |     | 3,723                  | (2.0)  | 4,281                  | (2.0)  |
|                                         | 5 days                                         |     | 2,665                  | (1.4)  | 2,913                  | (1.4)  |
|                                         | 6 days                                         |     | 1,970                  | (1.1)  | 2,119                  | (1.0)  |
|                                         | $\geq 7$ days                                  |     | 7,195                  | (3.9)  | 5,566                  | (2.6)  |
| <b>Antipsychotics used for delirium</b> |                                                |     |                        |        |                        |        |
| Antipsychotic use for delirium          | Yes                                            |     | 176,416                | (95.5) | 203,970                | (95.4) |
| Type of drug formulation                | Haloperidol                                    | INJ | 107,433                | (58.1) | 128,456                | (60.1) |
|                                         |                                                | TAB | 3,030                  | (1.6)  | 2,861                  | (1.3)  |
|                                         |                                                | FGR | 311                    | (0.2)  | 308                    | (0.1)  |
|                                         |                                                | SOL | 26                     | (0.0)  | 22                     | (0.0)  |
|                                         | Risperidone                                    | SOL | 45,913                 | (24.8) | 50,360                 | (23.5) |
|                                         |                                                | ODT | 10,987                 | (5.9)  | 11,442                 | (5.4)  |
|                                         |                                                | TAB | 7,314                  | (4.0)  | 7,493                  | (3.5)  |
|                                         |                                                | FGR | 445                    | (0.2)  | 415                    | (0.2)  |
|                                         |                                                | INJ | 9                      | (0.0)  | 7                      | (0.0)  |
|                                         | Quetiapine                                     | TAB | 28,040                 | (15.2) | 30,390                 | (14.2) |
|                                         |                                                | FGR | 1,126                  | (0.6)  | 1,006                  | (0.5)  |
|                                         |                                                | SRT | 26                     | (0.0)  | 34                     | (0.0)  |
|                                         | Olanzapine                                     | TAB | 4,055                  | (2.2)  | 3,569                  | (1.7)  |
|                                         |                                                | ODT | 1,678                  | (0.9)  | 1,569                  | (0.7)  |
|                                         |                                                | FGR | 270                    | (0.1)  | 248                    | (0.1)  |
|                                         |                                                | INJ | 27                     | (0.0)  | 16                     | (0.0)  |
|                                         | Perospirone                                    | TAB | 3,280                  | (1.8)  | 3,334                  | (1.6)  |

| Characteristics                           |                                                                                       | Sensitivity analysis 1 | Sensitivity analysis 2 |         |        |
|-------------------------------------------|---------------------------------------------------------------------------------------|------------------------|------------------------|---------|--------|
|                                           |                                                                                       | N (%)                  | N (%)                  |         |        |
| Duration of prescription, days            | Mean (SD)                                                                             | 5.7 (10.1)             | 5.3 (7.9)              |         |        |
| <b>Patient outcomes</b>                   |                                                                                       |                        |                        |         |        |
| Transfer to other hospitals/nursing homes | Yes                                                                                   | 43,028                 | (23.3)                 | 47,980  | (22.4) |
|                                           | Transfer to other hospitals or clinics                                                | 29,407                 | (15.9)                 | 32,083  | (15.0) |
|                                           | Admission to long-term care health facilities                                         | 3,146                  | (1.7)                  | 3,614   | (1.7)  |
|                                           | Admission to facilities covered by public aid providing long-term care to the elderly | 3,909                  | (2.1)                  | 4,485   | (2.1)  |
|                                           | Admission to social welfare facilities or fee-based homes for the elderly, etc.       | 6,555                  | (3.5)                  | 7,783   | (3.6)  |
|                                           | Nursing home                                                                          | 11                     | (0.0)                  | 15      | (0.0)  |
| Death                                     | Yes                                                                                   | 25,377                 | (13.7)                 | 21,567  | (10.1) |
|                                           | No                                                                                    | 159,397                | (86.2)                 | 192,239 | (89.9) |

\*Low degree of independence in daily life for the elderly with dementia

ADL, activities of daily living; FGR, fine granule; ICD-10, International Classification of Diseases, 10th revision; ICU, intensive care unit; INJ, injectable; ODT, orally disintegrating tablet; PIM, potentially inappropriate medication; SD, standard deviation; SOL, solution; SRT, sustained-release tablet; TAB, tablet.

Supplemental Figure 1 Patient selection flowchart for the sensitivity analysis.

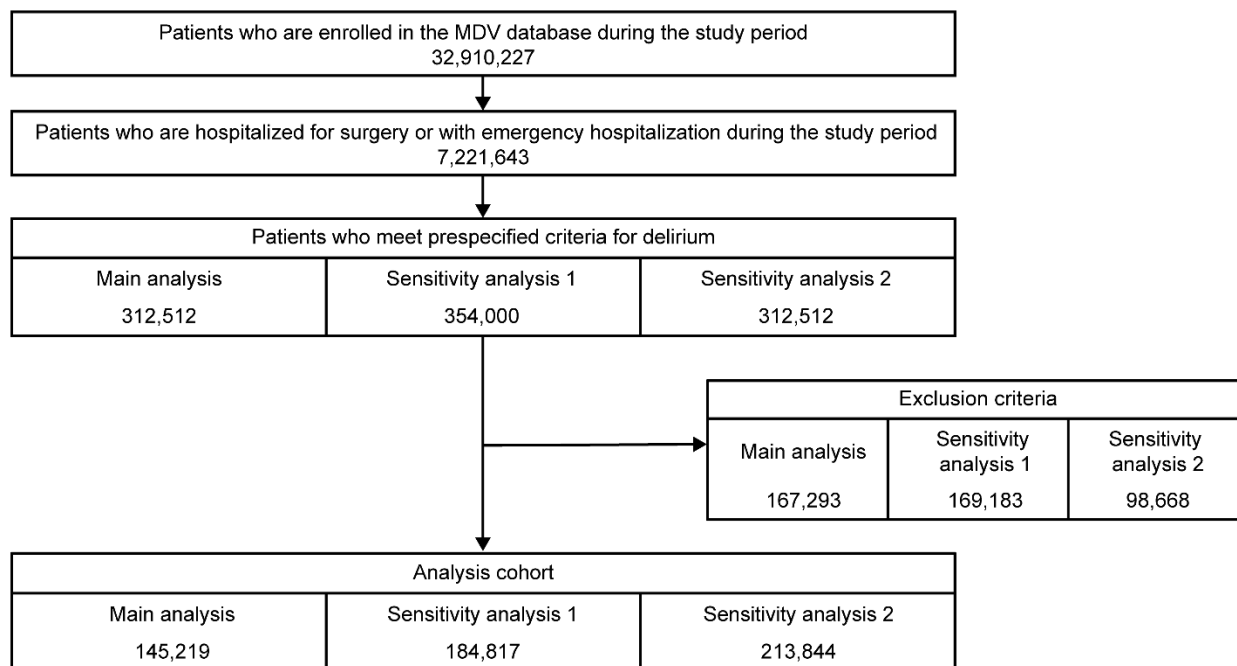

MDV, Medical Data Vision.

**STROBE 2007 (v4) Statement—Checklist of items that should be included in reports of *cross-sectional studies***

| Section/Topic                | Item # | Recommendation                                                                                                                                                                       | Reported on page # |
|------------------------------|--------|--------------------------------------------------------------------------------------------------------------------------------------------------------------------------------------|--------------------|
| <b>Title and abstract</b>    | 1      | (a) Indicate the study's design with a commonly used term in the title or the abstract                                                                                               | 1,3                |
|                              |        | (b) Provide in the abstract an informative and balanced summary of what was done and what was found                                                                                  | 3                  |
| <b>Introduction</b>          |        |                                                                                                                                                                                      |                    |
| Background/rationale         | 2      | Explain the scientific background and rationale for the investigation being reported                                                                                                 | 6                  |
| Objectives                   | 3      | State specific objectives, including any prespecified hypotheses                                                                                                                     | 6                  |
| <b>Methods</b>               |        |                                                                                                                                                                                      |                    |
| Study design                 | 4      | Present key elements of study design early in the paper                                                                                                                              | 7                  |
| Setting                      | 5      | Describe the setting, locations, and relevant dates, including periods of recruitment, exposure, follow-up, and data collection                                                      | 7                  |
| Participants                 | 6      | (a) Give the eligibility criteria, and the sources and methods of selection of participants                                                                                          | 7                  |
| Variables                    | 7      | Clearly define all outcomes, exposures, predictors, potential confounders, and effect modifiers. Give diagnostic criteria, if applicable                                             | 8                  |
| Data sources/<br>measurement | 8*     | For each variable of interest, give sources of data and details of methods of assessment (measurement). Describe comparability of assessment methods if there is more than one group | 8                  |
| Bias                         | 9      | Describe any efforts to address potential sources of bias                                                                                                                            | 8                  |
| Study size                   | 10     | Explain how the study size was arrived at                                                                                                                                            | 7 and 8            |
| Quantitative variables       | 11     | Explain how quantitative variables were handled in the analyses. If applicable, describe which groupings were chosen and why                                                         | 8                  |
| Statistical methods          | 12     | (a) Describe all statistical methods, including those used to control for confounding                                                                                                | 8                  |
|                              |        | (b) Describe any methods used to examine subgroups and interactions                                                                                                                  | NA                 |
|                              |        | (c) Explain how missing data were addressed                                                                                                                                          | NA                 |
|                              |        | (d) If applicable, describe analytical methods taking account of sampling strategy                                                                                                   | NA                 |
|                              |        | (e) Describe any sensitivity analyses                                                                                                                                                | 8                  |
| <b>Results</b>               |        |                                                                                                                                                                                      |                    |

|                          |     |                                                                                                                                                                                                              |           |
|--------------------------|-----|--------------------------------------------------------------------------------------------------------------------------------------------------------------------------------------------------------------|-----------|
| Participants             | 13* | (a) Report numbers of individuals at each stage of study—eg numbers potentially eligible, examined for eligibility, confirmed eligible, included in the study, completing follow-up, and analysed            | 9         |
|                          |     | (b) Give reasons for non-participation at each stage                                                                                                                                                         | 9         |
|                          |     | (c) Consider use of a flow diagram                                                                                                                                                                           | Figure 1  |
| Descriptive data         | 14* | (a) Give characteristics of study participants (eg demographic, clinical, social) and information on exposures and potential confounders                                                                     | 9         |
|                          |     | (b) Indicate number of participants with missing data for each variable of interest                                                                                                                          | NA        |
| Outcome data             | 15* | Report numbers of outcome events or summary measures                                                                                                                                                         | 9 and 10  |
| Main results             | 16  | (a) Give unadjusted estimates and, if applicable, confounder-adjusted estimates and their precision (eg, 95% confidence interval). Make clear which confounders were adjusted for and why they were included | NA        |
|                          |     | (b) Report category boundaries when continuous variables were categorized                                                                                                                                    | 15 to 18  |
|                          |     | (c) If relevant, consider translating estimates of relative risk into absolute risk for a meaningful time period                                                                                             | NA        |
| Other analyses           | 17  | Report other analyses done—eg analyses of subgroups and interactions, and sensitivity analyses                                                                                                               | 10        |
| <b>Discussion</b>        |     |                                                                                                                                                                                                              |           |
| Key results              | 18  | Summarise key results with reference to study objectives                                                                                                                                                     | 11        |
| Limitations              | 19  | Discuss limitations of the study, taking into account sources of potential bias or imprecision. Discuss both direction and magnitude of any potential bias                                                   | 13        |
| Interpretation           | 20  | Give a cautious overall interpretation of results considering objectives, limitations, multiplicity of analyses, results from similar studies, and other relevant evidence                                   | 11 and 12 |
| Generalisability         | 21  | Discuss the generalisability (external validity) of the study results                                                                                                                                        | 12 and 13 |
| <b>Other information</b> |     |                                                                                                                                                                                                              |           |
| Funding                  | 22  | Give the source of funding and the role of the funders for the present study and, if applicable, for the original study on which the present article is based                                                | 14        |

\*Give information separately for cases and controls in case-control studies and, if applicable, for exposed and unexposed groups in cohort and cross-sectional studies.

**Note:** An Explanation and Elaboration article discusses each checklist item and gives methodological background and published examples of transparent reporting. The STROBE checklist is best used in conjunction with this article (freely available on the Web sites of PLoS Medicine at <http://www.plosmedicine.org/>, Annals of Internal Medicine at <http://www.annals.org/>, and Epidemiology at <http://www.epidem.com/>). Information on the STROBE Initiative is available at [www.strobe-statement.org](http://www.strobe-statement.org).
