# Supplementary material for: Demographic and clinical characteristics of patients with delirium: analysis of a nationwide Japanese medical database
Source: PubMed Central journal article supplement — BMJ Open. 2022 Sep 14;12(9):e060630. doi: 10.1136/bmjopen-2021-060630 (PMC9476131; doi:10.1136/bmjopen-2021-060630), 2022-09-14
Supplement: bmjopen-2021-060630supp001.pdf [file bmjopen-2021-060630supp001.pdf]

**Supplemental Table 1 ICD-10 codes for delirium diagnosis.**

| Number of delirium patients identified by diagnosis (ICD-10) | Number of patients |        |
|--------------------------------------------------------------|--------------------|--------|
|                                                              | N                  | (%)    |
| Total                                                        | 17 124             | (11.8) |
| Delirium not superimposed on dementia (F05.0)                | 977                | (0.7)  |
| Delirium superimposed on dementia (F05.1)                    | 1447               | (1.0)  |
| Other delirium (F05.8)                                       | 37                 | (0.0)  |
| Subacute infection psychosis                                 | 0                  | (0.0)  |
| Subacute organic reaction                                    | 0                  | (0.0)  |
| Subacute organic psychiatric syndrome                        | 0                  | (0.0)  |
| Subacute cerebral syndrome                                   | 5                  | (0.0)  |
| Acute infectious psychosis                                   | 1                  | (0.0)  |
| Acute organic reaction                                       | 3                  | (0.0)  |
| Acute organic psychiatric syndrome                           | 2                  | (0.0)  |
| Acute confusional state                                      | 14                 | (0.0)  |
| Acute brain syndrome                                         | 11                 | (0.0)  |
| Non-alcoholic acute confusional state                        | 1                  | (0.0)  |
| Delirium, unspecified (F05.9)                                | 14 801             | (10.2) |
| Delirium                                                     | 11 828             | (8.1)  |
| Nocturnal delirium                                           | 2494               | (1.7)  |
| Senile nocturnal delirium                                    | 498                | (0.3)  |

ICD-10, International Classification of Diseases, 10th Revision.

**Supplemental Table 2 Definition of cognitive impairment.**

|                      |                                                                        | <b>Number of patients<br/>N (%)</b> |        |
|----------------------|------------------------------------------------------------------------|-------------------------------------|--------|
| Number of patients   |                                                                        | 145 219                             |        |
| Cognitive impairment | Yes                                                                    | 40 376                              | (27.8) |
|                      | Diagnosis of dementia (ICD-10)                                         | 21 498                              | (14.8) |
|                      | Prescription of anti-dementia drugs                                    | 12 032                              | (8.3)  |
|                      | Low degree of independence in daily life for the elderly with dementia | 25 537                              | (17.6) |

ICD-10, International Classification of Diseases, 10th Revision.

**Supplemental Table 3 Comorbidities (diseases present in  $\geq 3\%$  of patients with delirium in each category).**

| Category                                      | Disease                                                     | ICD-10  | Number of patients |        |
|-----------------------------------------------|-------------------------------------------------------------|---------|--------------------|--------|
|                                               |                                                             |         | N                  | (%)    |
| Number of patients                            |                                                             |         | 145                | 219    |
| Circulatory system diseases                   |                                                             | I00-199 | 81 954             | (56.4) |
|                                               | Essential (primary) hypertension                            | I10     | 47 887             | (33.0) |
|                                               | Heart failure                                               | I50     | 23 214             | (16.0) |
|                                               | Atrial fibrillation and flutter                             | I48     | 12 774             | (8.8)  |
|                                               | Angina pectoris                                             | I20     | 11 296             | (7.8)  |
|                                               | Sequelae of cerebrovascular disease                         | I69     | 8759               | (6.0)  |
|                                               | Cerebral infarction                                         | I63     | 6577               | (4.5)  |
|                                               | Aortic aneurysm and dissection                              | I71     | 4432               | (3.1)  |
| Endocrine, nutritional and metabolic diseases |                                                             | E00-E90 | 59 955             | (41.3) |
|                                               | Type 2 diabetes mellitus                                    | E11     | 23 809             | (16.4) |
|                                               | Disorders of lipoprotein metabolism and other lipidaemia    | E78     | 17 530             | (12.1) |
|                                               | Volume depletion                                            | E86     | 13 698             | (9.4)  |
|                                               | Other disorders of fluid, electrolyte and acid-base balance | E87     | 4896               | (3.4)  |
|                                               | Unspecified diabetes mellitus                               | E14     | 4364               | (3.0)  |
| Digestive system diseases                     |                                                             | K00-K93 | 59 691             | (41.1) |
|                                               | Gastroesophageal reflux disease                             | K21     | 13 242             | (9.1)  |
|                                               | Other functional intestinal disorders                       | K59     | 10 515             | (7.2)  |
|                                               | Gastric ulcer                                               | K25     | 9864               | (6.8)  |
|                                               | Cholelithiasis                                              | K80     | 8230               | (5.7)  |

|                                                                  |             |        |        |
|------------------------------------------------------------------|-------------|--------|--------|
| Paralytic ileus and intestinal obstruction without hernia        | K56         | 5276   | (3.6)  |
| Gastritis and duodenitis                                         | K29         | 5025   | (3.5)  |
| Other diseases of the biliary tract                              | K83         | 4850   | (3.3)  |
| <hr/>                                                            |             |        |        |
| Malignant neoplasms                                              | C00-<br>C97 | 41 710 | (28.7) |
| Malignant neoplasm of stomach                                    | C16         | 7644   | (5.3)  |
| Malignant neoplasm of colon                                      | C18         | 7163   | (4.9)  |
| Secondary malignant neoplasm of respiratory and digestive organs | C78         | 5631   | (3.9)  |
| Malignant neoplasm of bronchus and lung                          | C34         | 4433   | (3.1)  |
| <hr/>                                                            |             |        |        |
| Respiratory system diseases                                      | J00-<br>J99 | 36 958 | (25.4) |
| Respiratory failure, not elsewhere classified                    | J96         | 14 385 | (9.9)  |
| Pneumonia, organism unspecified                                  | J18         | 7004   | (4.8)  |
| Pneumonitis due to solids and liquids                            | J69         | 6991   | (4.8)  |
| <hr/>                                                            |             |        |        |
| Nervous system diseases                                          | G00-<br>G99 | 28 557 | (19.7) |
| Alzheimer disease                                                | G30         | 9659   | (6.7)  |
| Sleep disorders                                                  | G47         | 9351   | (6.4)  |
| <hr/>                                                            |             |        |        |
| Genitourinary system diseases                                    | N00-<br>N99 | 25 617 | (17.6) |
| Chronic kidney disease                                           | N18         | 8208   | (5.7)  |
| Benign prostatic hyperplasia                                     | N40         | 5360   | (3.7)  |
| <hr/>                                                            |             |        |        |
| Mental and behavioural disorders                                 | F00-<br>F99 | 20 047 | (13.8) |
| Unspecified dementia                                             | F03         | 8934   | (6.2)  |
| <hr/>                                                            |             |        |        |
| Musculoskeletal system/connective tissue diseases                | M00-<br>M99 | 17 523 | (12.1) |

|                                                        |                             |                                |        |        |
|--------------------------------------------------------|-----------------------------|--------------------------------|--------|--------|
| Injury                                                 |                             | S00-<br>T35                    | 15 866 | (10.9) |
|                                                        | Fracture of femur           | S72                            | 6427   | (4.4)  |
| Blood diseases                                         |                             | D50-<br>D89                    | 13 458 | (9.3)  |
|                                                        | Iron deficiency anaemia     | D50                            | 6881   | (4.7)  |
| Infectious disease<br>(excluding parasitic<br>disease) | -                           | A00-<br>A49<br>/<br>B90-<br>99 | 12 442 | (8.6)  |
| Skin/subcutaneous tissue<br>disease                    | -                           | L00-<br>L99                    | 4094   | (2.8)  |
| Eye disease                                            | -                           | H00-<br>H59                    | 1565   | (1.1)  |
| Poisoning                                              | -                           | T36-<br>T65                    | 806    | (0.6)  |
| Ear disease                                            | -                           | H60-<br>H95                    | 624    | (0.4)  |
| Others                                                 |                             |                                | 39 232 | (27.0) |
|                                                        | Somnolence, stupor and coma | R40                            | 6943   | (4.8)  |

ICD-10, International Classification of Diseases, 10th Revision.

**Supplemental Table 4 Hospitalisation information.**

|                         |                                           | Number of patients<br>N (%) |        |
|-------------------------|-------------------------------------------|-----------------------------|--------|
| Number of patients      |                                           | 145 219                     |        |
| Type of hospitalisation | Hospitalisation with elective surgery     | 52 766                      | (36.3) |
|                         | Emergency hospitalisation without surgery | 59 727                      | (41.1) |
|                         | Emergency hospitalisation with surgery    | 32 726                      | (22.5) |
| Number of beds          | 0–199 beds                                | 6760                        | (4.7)  |
|                         | 200–499 beds                              | 79 995                      | (55.1) |
|                         | ≥500 beds                                 | 58 464                      | (40.3) |
| Inpatient department    | Surgery                                   | 28 656                      | (19.7) |
|                         | Internal Medicine                         | 28 232                      | (19.4) |
|                         | Gastroenterology                          | 15 445                      | (10.6) |
|                         | Cardiology                                | 12 337                      | (8.5)  |
|                         | Orthopaedics                              | 11 302                      | (7.8)  |
|                         | Neurosurgery                              | 8144                        | (5.6)  |
|                         | Urology                                   | 7031                        | (4.8)  |
|                         | Cardiovascular Surgery                    | 6042                        | (4.2)  |
|                         | Respiratory Medicine                      | 5506                        | (3.8)  |
|                         | Gastrointestinal Surgery                  | 4093                        | (2.8)  |
|                         | Emergency Medicine                        | 3414                        | (2.4)  |
|                         | Neurology                                 | 3008                        | (2.1)  |
|                         | Pulmonary Surgery                         | 1734                        | (1.2)  |
|                         | Obstetrics & Gynaecology                  | 1528                        | (1.1)  |
|                         | Otolaryngology                            | 1416                        | (1.0)  |
| Nephrology              | 1252                                      | (0.9)                       |        |
| Haematology             | 729                                       | (0.5)                       |        |

|         |                                               |        |        |
|---------|-----------------------------------------------|--------|--------|
|         | Endocrinology, Metabolism & Diabetology       | 706    | (0.5)  |
|         | Reconstructive Surgery                        | 625    | (0.4)  |
|         | Ophthalmology                                 | 606    | (0.4)  |
|         | Others                                        | 2977   | (2.1)  |
|         | Unknown                                       | 436    | (0.3)  |
| <hr/>   |                                               |        |        |
| Surgery | Yes                                           | 85 492 | (58.9) |
|         | Surgery sites:                                |        |        |
|         | Abdomen                                       | 38 898 | (26.8) |
|         | Heart and blood vessels                       | 15 240 | (10.5) |
|         | Musculoskeletal system, extremities and trunk | 10 424 | (7.2)  |
|         | Thoracic                                      | 6061   | (4.2)  |
|         | Urinary system and adrenal glands             | 4893   | (3.4)  |
|         | Nervous system and cranial                    | 3708   | (2.6)  |
|         | Skin or subcutaneous tissue                   | 3076   | (2.1)  |
|         | Genital                                       | 2557   | (1.8)  |
|         | Ear, nose and throat                          | 1113   | (0.8)  |
|         | Face, mouth and neck                          | 738    | (0.5)  |
|         | Eyes                                          | 606    | (0.4)  |

---

**Supplemental Table 5 Sensitivity analyses: Delirium identification algorithm, patient characteristics, clinical practice, delirium treatment with antipsychotics and patient outcomes.**

| Characteristics                                         |                                     | Sensitivity analysis 1 |        | Sensitivity analysis 2 |        |
|---------------------------------------------------------|-------------------------------------|------------------------|--------|------------------------|--------|
|                                                         |                                     | N (%)                  |        | N (%)                  |        |
| Number of subjects                                      |                                     | 184 817                |        | 213 844                |        |
| <b>Delirium identification algorithm</b>                |                                     |                        |        |                        |        |
| Patients meeting criteria                               | Diagnosis (ICD-10) only             | 8401                   | (4.5)  | 9874                   | (4.6)  |
|                                                         | Antipsychotic prescription only     | 167 756                | (90.8) | 193 507                | (90.5) |
|                                                         | Both                                | 8660                   | (4.7)  | 10 463                 | (4.9)  |
| <b>Patient demographic and baseline characteristics</b> |                                     |                        |        |                        |        |
| Age (years)                                             | Mean (SD)                           | 76.1 (13.8)            |        | 76.3 (14.1)            |        |
|                                                         | ≤64                                 | 29 659                 | (16.0) | 34 204                 | (16.0) |
|                                                         | 65–74                               | 37 770                 | (20.4) | 41 091                 | (19.2) |
|                                                         | 75–84                               | 62 820                 | (34.0) | 71 825                 | (33.6) |
|                                                         | ≥85                                 | 54 568                 | (29.5) | 66 724                 | (31.2) |
| Sex                                                     | Male                                | 105 167                | (56.9) | 120 696                | (56.4) |
|                                                         | Female                              | 79 650                 | (43.1) | 93 148                 | (43.6) |
| ADL score (point)                                       | Dependent group (0–59)              | 96 591                 | (52.3) | 113 005                | (52.8) |
|                                                         | Independent group (60–100)          | 85 101                 | (46.0) | 97 296                 | (45.5) |
|                                                         | Unknown                             | 3125                   | (1.7)  | 3543                   | (1.7)  |
| Cognitive impairment                                    | Yes                                 | 49 445                 | (26.8) | 60 930                 | (28.5) |
|                                                         | Diagnosis of dementia (ICD-10)      | 26 470                 | (14.3) | 33 014                 | (15.4) |
|                                                         | Prescription of anti-dementia drugs | 15 214                 | (8.2)  | 18 685                 | (8.7)  |
|                                                         | Low degree of independence*         | 30 820                 | (16.7) | 38 575                 | (18.0) |
| Inpatient department                                    | Surgery                             | 36 983                 | (20.0) | 38 799                 | (18.1) |
|                                                         | Internal Medicine                   | 33 955                 | (18.4) | 40 868                 | (19.1) |
|                                                         | Gastroenterology                    | 20 135                 | (10.9) | 26 557                 | (12.4) |
|                                                         | Cardiology                          | 14 845                 | (8.0)  | 19 516                 | (9.1)  |
|                                                         | Orthopaedics                        | 14 769                 | (8.0)  | 15 886                 | (7.4)  |
|                                                         | Neurosurgery                        | 10 039                 | (5.4)  | 12 943                 | (6.1)  |
|                                                         | Urology                             | 8619                   | (4.7)  | 10 501                 | (4.9)  |
|                                                         | Cardiovascular Surgery              | 7953                   | (4.3)  | 7405                   | (3.5)  |
|                                                         | Respiratory Medicine                | 7056                   | (3.8)  | 7484                   | (3.5)  |
|                                                         | Gastrointestinal Surgery            | 5427                   | (2.9)  | 4905                   | (2.3)  |
|                                                         | Emergency Medicine                  | 4047                   | (2.2)  | 5245                   | (2.5)  |
|                                                         | Neurology                           | 3598                   | (1.9)  | 4648                   | (2.2)  |
|                                                         | Pulmonary Surgery                   | 2134                   | (1.2)  | 2297                   | (1.1)  |
|                                                         | Obstetrics & Gynaecology            | 2034                   | (1.1)  | 2274                   | (1.1)  |
|                                                         | Otolaryngology                      | 2033                   | (1.1)  | 2047                   | (1.0)  |



| Characteristics                    |                                                   | Sensitivity analysis 1 |        | Sensitivity analysis 2 |        |
|------------------------------------|---------------------------------------------------|------------------------|--------|------------------------|--------|
|                                    |                                                   | N (%)                  |        | N (%)                  |        |
|                                    | Nephrology                                        | 1728                   | (0.9)  | 1755                   | (0.8)  |
|                                    | General Medicine                                  | 1272                   | (0.7)  | 1574                   | (0.7)  |
|                                    | Haematology                                       | 1024                   | (0.6)  | 974                    | (0.5)  |
|                                    | Endocrinology, Metabolism & Diabetology           | 859                    | (0.5)  | 1037                   | (0.5)  |
|                                    | Reconstructive Surgery                            | 905                    | (0.5)  | 958                    | (0.4)  |
|                                    | Ophthalmology                                     | 720                    | (0.4)  | 1040                   | (0.5)  |
|                                    | Others                                            | 4093                   | (2.2)  | 4550                   | (2.1)  |
|                                    | Unknown                                           | 589                    | (0.3)  | 581                    | (0.3)  |
| Comorbidities                      | Circulatory system diseases                       | 103 602                | (56.1) | 119 306                | (55.8) |
|                                    | Endocrine, nutritional and metabolic diseases     | 77 200                 | (41.8) | 86 310                 | (40.4) |
|                                    | Digestive system diseases                         | 76 319                 | (41.3) | 88 300                 | (41.3) |
|                                    | Malignant neoplasms                               | 56 282                 | (30.5) | 58 680                 | (27.4) |
|                                    | Others                                            | 51 859                 | (28.1) | 57 420                 | (26.9) |
|                                    | Respiratory system diseases                       | 47 586                 | (25.7) | 52 118                 | (24.4) |
|                                    | Nervous system diseases                           | 36 193                 | (19.6) | 42 476                 | (19.9) |
|                                    | Genitourinary system diseases                     | 32 942                 | (17.8) | 36 993                 | (17.3) |
|                                    | Mental and behavioural disorders                  | 24 824                 | (13.4) | 30 773                 | (14.4) |
|                                    | Musculoskeletal system/connective tissue diseases | 22 601                 | (12.2) | 24 732                 | (11.6) |
|                                    | Injury                                            | 20 340                 | (11.0) | 23 901                 | (11.2) |
|                                    | Blood diseases                                    | 18 251                 | (9.9)  | 19 041                 | (8.9)  |
|                                    | Infectious disease (excluding parasitic disease)  | 16 392                 | (8.9)  | 17 308                 | (8.1)  |
|                                    | Skin/subcutaneous tissue disease                  | 5688                   | (3.1)  | 5836                   | (2.7)  |
|                                    | Eye disease                                       | 1960                   | (1.1)  | 2445                   | (1.1)  |
|                                    | Poisoning                                         | 876                    | (0.5)  | 1399                   | (0.7)  |
|                                    | Ear disease                                       | 793                    | (0.4)  | 927                    | (0.4)  |
| <b>Hospitalisation information</b> |                                                   |                        |        |                        |        |
| Type of hospitalisation            | Hospitalisation for elective surgery              | 52 647                 | (28.5) | 64 141                 | (30.0) |
|                                    | Emergency hospitalisation without surgery         | 71 805                 | (38.9) | 88 286                 | (41.3) |
|                                    | Emergency hospitalisation with surgery            | 44 391                 | (24.0) | 48 568                 | (22.7) |
|                                    | Unknown                                           | 15 974                 | (8.6)  | 12 849                 | (6.0)  |
| Number of beds                     | 0–199                                             | 8992                   | (4.9)  | 9895                   | (4.6)  |
|                                    | 200–499                                           | 101 596                | (55.0) | 117 555                | (55.0) |
|                                    | ≥500                                              | 74 229                 | (40.2) | 86 394                 | (40.4) |

| Characteristics          |                                                  | Sensitivity analysis 1 |        | Sensitivity analysis 2 |        |
|--------------------------|--------------------------------------------------|------------------------|--------|------------------------|--------|
|                          |                                                  | N (%)                  |        | N (%)                  |        |
| <b>Clinical practice</b> |                                                  |                        |        |                        |        |
| Prescription of PIM      | Yes                                              | 94 998                 | (51.4) | 69 827                 | (32.7) |
|                          | Antidepressants                                  | 371                    | (0.2)  | 254                    | (0.1)  |
|                          | Anticholinergic drugs                            | 194                    | (0.1)  | 137                    | (0.1)  |
|                          | Benzodiazepines                                  | 38 988                 | (21.1) | 28 269                 | (13.2) |
|                          | Non-benzodiazepines                              | 12 954                 | (7.0)  | 8780                   | (4.1)  |
|                          | Corticosteroids                                  | 21 746                 | (11.8) | 13 734                 | (6.4)  |
|                          | H1-receptor antagonists                          | 12 388                 | (6.7)  | 6959                   | (3.3)  |
|                          | H2-receptor antagonists                          | 21 028                 | (11.4) | 15 246                 | (7.1)  |
|                          | Opioids                                          | 35 588                 | (19.3) | 19 253                 | (9.0)  |
| Prescription of PIM      | 1                                                | 5640                   | (3.1)  | 4728                   | (2.2)  |
| (number of PIM           | 2                                                | 7794                   | (4.2)  | 6064                   | (2.8)  |
| drugs)                   | 3                                                | 7985                   | (4.3)  | 6451                   | (3.0)  |
|                          | ≥4                                               | 73 579                 | (39.8) | 52 584                 | (24.6) |
| Prescription of PIM      | 1                                                | 58 500                 | (31.7) | 51 123                 | (23.9) |
| (number of PIM           | 2                                                | 26 719                 | (14.5) | 15 136                 | (7.1)  |
| classes)                 | 3                                                | 8011                   | (4.3)  | 3089                   | (1.4)  |
|                          | ≥4                                               | 1768                   | (1.0)  | 479                    | (0.2)  |
| Surgery                  | Yes                                              | 113 012                | (61.1) | 125 558                | (58.7) |
|                          | Surgery sites:                                   |                        |        |                        |        |
|                          | Skin or subcutaneous tissue                      | 4477                   | (2.4)  | 4672                   | (2.2)  |
|                          | Musculoskeletal system,<br>extremities and trunk | 13 859                 | (7.5)  | 14 564                 | (6.8)  |
|                          | Nervous system and cranial                       | 4825                   | (2.6)  | 5695                   | (2.7)  |
|                          | Eyes                                             | 704                    | (0.4)  | 1060                   | (0.5)  |
|                          | Ear, nose and throat                             | 1895                   | (1.0)  | 1570                   | (0.7)  |
|                          | Face, mouth and neck                             | 874                    | (0.5)  | 1192                   | (0.6)  |
|                          | Thoracic                                         | 7613                   | (4.1)  | 9017                   | (4.2)  |
|                          | Heart and blood vessels                          | 21 172                 | (11.5) | 21 846                 | (10.2) |
|                          | Abdomen                                          | 51 061                 | (27.6) | 57 020                 | (26.7) |
|                          | Urinary system and adrenal gland                 | 6173                   | (3.3)  | 7365                   | (3.4)  |
|                          | Genital                                          | 2964                   | (1.6)  | 3933                   | (1.8)  |
|                          | Anaesthesia type/duration:                       |                        |        |                        |        |
|                          | Surgery + no/local/light general<br>anaesthesia  | 49 357                 | (26.7) | 58 743                 | (27.5) |
|                          | Surgery + general anaesthesia (<2<br>hours)      | 27 276                 | (14.8) | 32 179                 | (15.0) |

| Characteristics                         |                                                 | Sensitivity analysis 1 |         | Sensitivity analysis 2 |         |        |
|-----------------------------------------|-------------------------------------------------|------------------------|---------|------------------------|---------|--------|
|                                         |                                                 | N (%)                  |         | N (%)                  |         |        |
|                                         | Surgery + general anaesthesia ( $\geq 2$ hours) | 36 379                 | (19.7)  | 34 636                 | (16.2)  |        |
| Duration of hospitalisation             | Mean (SD), days                                 | 19.5 (18.9)            |         | 14.9 (11.7)            |         |        |
|                                         | $\leq 1$ week                                   | 22 368                 | (12.1)  | 44 771                 | (20.9)  |        |
|                                         | $> 1$ week to $\leq 2$ weeks                    | 60 821                 | (32.9)  | 81 671                 | (38.2)  |        |
|                                         | $> 2$ weeks to $\leq 3$ weeks                   | 48 981                 | (26.5)  | 50 271                 | (23.5)  |        |
|                                         | $> 3$ weeks to $\leq 4$ weeks                   | 26 094                 | (14.1)  | 22 322                 | (10.4)  |        |
|                                         | $> 4$ weeks to $\leq 12$ weeks                  | 24 247                 | (13.1)  | 14 092                 | (6.6)   |        |
|                                         | $> 12$ weeks                                    | 2306                   | (1.2)   | 717                    | (0.3)   |        |
| Use of ICU                              | Yes                                             | 42 565                 | (23.0)  | 47 127                 | (22.0)  |        |
| Duration, days                          | Mean (SD)                                       | 3.8 (3.7)              |         | 3.3 (3.0)              |         |        |
|                                         | 1 day                                           | 14 765                 | (8.0)   | 17 264                 | (8.1)   |        |
|                                         | 2 days                                          | 7146                   | (3.9)   | 8810                   | (4.1)   |        |
|                                         | 3 days                                          | 5101                   | (2.8)   | 6174                   | (2.9)   |        |
|                                         | 4 days                                          | 3723                   | (2.0)   | 4281                   | (2.0)   |        |
|                                         | 5 days                                          | 2665                   | (1.4)   | 2913                   | (1.4)   |        |
|                                         | 6 days                                          | 1970                   | (1.1)   | 2119                   | (1.0)   |        |
|                                         | $\geq 7$ days                                   | 7195                   | (3.9)   | 5566                   | (2.6)   |        |
| <b>Antipsychotics used for delirium</b> |                                                 |                        |         |                        |         |        |
| Antipsychotic use for delirium          | Yes                                             | 176 416                | (95.5)  | 203 970                | (95.4)  |        |
| Type of drug formulation                | Haloperidol                                     | INJ                    | 107 433 | (58.1)                 | 128 456 | (60.1) |
|                                         |                                                 | TAB                    | 3030    | (1.6)                  | 2861    | (1.3)  |
|                                         |                                                 | FGR                    | 311     | (0.2)                  | 308     | (0.1)  |
|                                         | Risperidone                                     | SOL                    | 26      | (0.0)                  | 22      | (0.0)  |
|                                         |                                                 | SOL                    | 45 913  | (24.8)                 | 50 360  | (23.5) |
|                                         |                                                 | ODT                    | 10 987  | (5.9)                  | 11 442  | (5.4)  |
|                                         |                                                 | TAB                    | 7314    | (4.0)                  | 7493    | (3.5)  |
|                                         | Quetiapine                                      | FGR                    | 445     | (0.2)                  | 415     | (0.2)  |
|                                         |                                                 | INJ                    | 9       | (0.0)                  | 7       | (0.0)  |
|                                         |                                                 | TAB                    | 28 040  | (15.2)                 | 30 390  | (14.2) |
|                                         | Olanzapine                                      | FGR                    | 1126    | (0.6)                  | 1006    | (0.5)  |
|                                         |                                                 | SRT                    | 26      | (0.0)                  | 34      | (0.0)  |
|                                         |                                                 | TAB                    | 4055    | (2.2)                  | 3569    | (1.7)  |
|                                         |                                                 | ODT                    | 1678    | (0.9)                  | 1569    | (0.7)  |
|                                         | Perospirone                                     | FGR                    | 270     | (0.1)                  | 248     | (0.1)  |
|                                         |                                                 | INJ                    | 27      | (0.0)                  | 16      | (0.0)  |
| TAB                                     |                                                 | 3280                   | (1.8)   | 3334                   | (1.6)   |        |

| Characteristics                           |                                                                                       | Sensitivity analysis 1 |        | Sensitivity analysis 2 |        |
|-------------------------------------------|---------------------------------------------------------------------------------------|------------------------|--------|------------------------|--------|
|                                           |                                                                                       | N (%)                  |        | N (%)                  |        |
| Duration of prescription, days            | Mean (SD)                                                                             | 5.7 (10.1)             |        | 5.3 (7.9)              |        |
| <b>Patient outcomes</b>                   |                                                                                       |                        |        |                        |        |
| Transfer to other hospitals/nursing homes | Yes                                                                                   | 43 028                 | (23.3) | 47 980                 | (22.4) |
|                                           | Transfer to other hospitals or clinics                                                | 29 407                 | (15.9) | 32 083                 | (15.0) |
|                                           | Admission to long-term care health facilities                                         | 3 146                  | (1.7)  | 3 614                  | (1.7)  |
|                                           | Admission to facilities covered by public aid providing long-term care to the elderly | 3 909                  | (2.1)  | 4 485                  | (2.1)  |
|                                           | Admission to social welfare facilities or fee-based homes for the elderly, etc.       | 6 555                  | (3.5)  | 7 783                  | (3.6)  |
|                                           | Nursing home                                                                          | 11                     | (0.0)  | 15                     | (0.0)  |
| Death                                     | Yes                                                                                   | 25 377                 | (13.7) | 21 567                 | (10.1) |
|                                           | No                                                                                    | 159 397                | (86.2) | 192 239                | (89.9) |

\*Low degree of independence in daily life for the elderly with dementia

ADL, activities of daily living; FGR, fine granule; ICD-10, International Classification of Diseases, 10th revision; ICU, intensive care unit; INJ, injectable; ODT, orally disintegrating tablet; PIM, potentially inappropriate medication; SD, standard deviation; SOL, solution; SRT, sustained-release tablet; TAB, tablet.

**Supplemental Figure 1 Patient selection flowchart for the sensitivity analysis.**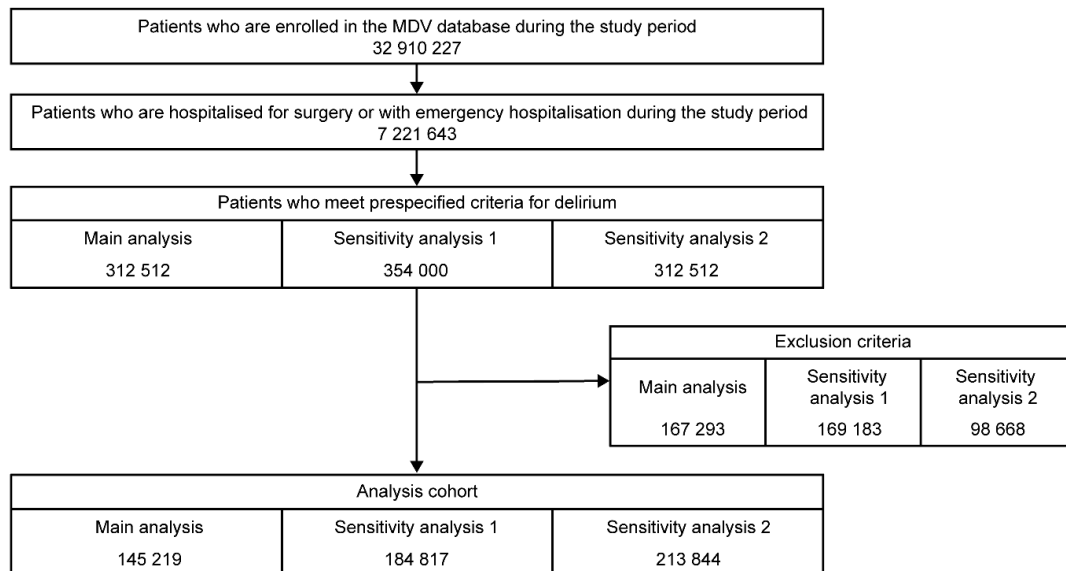

MDV, Medical Data Vision.
